# 1 Spatially aware deep learning reveals tumor heterogeneity patterns that encode distinct kidney 2 cancer states

3 Jackson Nyman<sup>1,2,3</sup>, Thomas Denize<sup>4</sup>, Ziad Bakouny<sup>5,1,6,3</sup>, Chris Labaki<sup>1,3,6</sup>, Breanna M. Titchen<sup>7,1,3</sup>,  
4 Kevin Bi<sup>1,3</sup>, Surya Narayanan Hari<sup>1,3</sup>, Jacob Rosenthal<sup>8,9</sup>, Nicita Mehta<sup>1,3,6</sup>, Bowen Jiang<sup>1,3,10</sup>, Bijaya  
5 Sharma<sup>17</sup>, Kristen Felt<sup>17</sup>, Renato Umeton<sup>8,11,12,9</sup>, David A. Braun<sup>13</sup>, Scott Rodig<sup>4</sup>, Toni K. Chouieri<sup>1,6,14</sup>,  
6 Sabina Signoretti<sup>15,4,6,3</sup>, Eliezer M. Van Allen\*<sup>1,16,3,6</sup>

7  
8 <sup>1</sup>Department of Medical Oncology, Dana-Farber Cancer Institute, Boston, MA, USA, <sup>2</sup>Harvard Graduate  
9 Program in Systems Biology, Cambridge, MA, USA, <sup>3</sup>Broad Institute, Cambridge, MA, USA,  
10 <sup>4</sup>Department of Pathology, Brigham and Women's Hospital, Boston, MA, USA, <sup>5</sup>Department of  
11 Medicine, Brigham and Women's Hospital, Boston, MA, USA, <sup>6</sup>Harvard Medical School, Boston, MA,  
12 USA, <sup>7</sup>Harvard Graduate Program in Biological and Biomedical Sciences, Boston, MA, USA,  
13 <sup>8</sup>Department of Informatics & Analytics, Dana-Farber Cancer Institute, Boston, MA, USA, <sup>9</sup>Department  
14 of Laboratory Medicine, Weill Cornell Medicine, New York, NY, USA, <sup>10</sup>Stanford University, Stanford,  
15 CA, USA, <sup>11</sup>Department of Biological Engineering, Massachusetts Institute of Technology, Cambridge,  
16 MA, USA, <sup>12</sup>Department of Biostatistics, Harvard T.H. Chan School of Public Health, Boston, MA, USA,  
17 <sup>13</sup>Center of Molecular and Cellular Oncology, Yale Cancer Center, Yale School of Medicine, New  
18 Haven, CT, USA, <sup>14</sup>Brigham and Women's Hospital, Boston, MA, USA, <sup>15</sup>Department of Oncologic  
19 Pathology, Dana-Farber Cancer Institute, Boston, MA, USA, <sup>16</sup>Department of Population Sciences,  
20 Dana-Farber Cancer Institute, Boston, MA, USA, <sup>17</sup>ImmunoProfile, Department of Pathology, Brigham  
21 & Women's Hospital and Dana-Farber Cancer Institute, Boston, MA, \*Corresponding Author

## 22 Abstract

23  
24 Clear cell renal cell carcinoma (ccRCC) is molecularly heterogeneous, immune infiltrated, and  
25 selectively sensitive to immune checkpoint inhibition (ICI). Established histopathology paradigms like  
26 nuclear grade have baseline prognostic relevance for ccRCC, although whether existing or novel  
27 histologic features encode additional heterogeneous biological and clinical states in ccRCC is  
28 uncertain. Here, we developed spatially aware deep learning models of tumor- and immune-related  
29 features to learn representations of ccRCC tumors using diagnostic whole-slide images (WSI) in  
30 untreated and treated contexts (n = 1102 patients). We discovered patterns of nuclear grade  
31 heterogeneity in WSI not achievable through human pathologist analysis, and these graph-based  
32 “microheterogeneity” structures associated with *PBRM1* loss of function, adverse clinical factors, and  
33 selective patient response to ICI. Joint computer vision analysis of tumor phenotypes with inferred  
34 tumor infiltrating lymphocyte density identified a further subpopulation of highly infiltrated,  
35 microheterogeneous tumors responsive to ICI. In paired multiplex immunofluorescence images of  
36 ccRCC, microheterogeneity associated with greater PD1 activation in CD8+ lymphocytes and  
37 increased tumor-immune interactions. Thus, our work reveals novel spatially interacting tumor-immune  
38 structures underlying ccRCC biology that can also inform selective response to ICI.

## 39 Background

40  
41 Renal cell carcinoma (RCC) is among the 10 most common cancers worldwide and is  
42 comprised of several histological subtypes<sup>1</sup>. The clear cell histological subtype (ccRCC) is the most  
43 common form of RCC and accounts for the vast majority (75-80%) of metastatic cases<sup>1</sup>. In addition to  
44 highly recurrent mutations in hypoxia (*VHL*) and chromatin regulator genes (e.g. *PBRM1*, *BAP1*,

45 *SETD2*), ccRCC exhibits extensive genomic intratumoral heterogeneity (ITH)<sup>2</sup>, which was correlated  
46 with worse progression free survival in both the TRACERx and TCGA-KIRC cohorts<sup>3-5</sup>. Nuclear grade,  
47 an established histopathologic score of tumor nuclei dedifferentiation, is a primary prognostic feature in  
48 ccRCC and can provide a histologic description of ITH<sup>6</sup> to pinpoint cell structures enriched for  
49 metastatic potential<sup>7,8</sup>. In addition, high nuclear grade has been associated with increased tumor-  
50 infiltrating lymphocytes (TILs) in ccRCC<sup>9</sup>, though whether molecular ITH or its relationship to histologic  
51 properties (e.g. grade, TILs) inform immunoresponsive tumor states in ccRCC is uncertain. Indeed,  
52 while immune checkpoint inhibitors (ICIs) are a standard therapy in ccRCC, this tumor type defies many  
53 conventions about molecular features that associate with selective ICI response identified in other solid  
54 tumors<sup>10-11-13</sup>, and both the underlying biology and clinical biomarkers to stratify patients for ICI in  
55 ccRCC remain elusive.

56 Current approaches to simultaneously quantify tumor-intrinsic heterogeneity and its potential  
57 relationship to immune microenvironmental interactions in patients are hamstrung by (i) lack of spatial  
58 resolution in molecular sequencing, (ii) difficulty with simultaneous multiregional measurements of  
59 tumor and immune molecular properties in sufficient cohort sizes, and (iii) practical limitations related to  
60 pathologists being incapable of manually perform such measurements from histopathology data at  
61 scale. However, by leveraging biologically guided deep learning applied to WSIs, highly detailed  
62 evaluation of both established pathology features (e.g. nuclear grade) and novel spatial structures that  
63 arise from these features are possible at a scale otherwise intractable via manual pathologist  
64 review<sup>14,15</sup>. Thus, we hypothesized that spatially aware deep learning models of ccRCC WSIs could  
65 provide a unified understanding of distinct tissue structures that dictate biological and clinical states in  
66 ccRCC, and we examined this hypothesis in multiple clinical ccRCC cohorts.

67

## 68 **Results**

### 69 **Development of a deep learning framework for ccRCC diagnostic images**

70 We first developed prediction models that provide high resolution, quantitative, and human-  
71 understandable representations of ccRCC hematoxylin & eosin (H&E) WSIs to identify established  
72 pathology features like tumor tissue and nuclear grade at scale<sup>16,17</sup> (Fig. 1A; Methods, Extended Data  
73 Figures 1-8). After quality control analysis, we examined WSIs from 1102 ccRCC patients (n = 421  
74 TCGA-KIRC, 439 CM-025, 208 DFCI-PROFILE, 21 multiblock nephrectomy cases, 13 paired mIF  
75 ccRCC cases; Methods). We next trained a second CNN classifier to distinguish low (G2) from high  
76 (G4) grade cases in the DFCI-PROFILE cohort, achieving high accuracy at the patient level when  
77 evaluated on the TCGA-KIRC dataset using an ensemble of four models (AUROC=0.88; Fig. 1B,  
78 Extended Data Fig. 1A). In addition to this binary prediction performance, we also compared the  
79 stratification capabilities of continuous nuclear grading to classical pathologist-assigned grades in  
80 TCGA-KIRC. We first discretized continuous grade scores into tercile bins to mirror G2/G3/G4  
81 categories, which produced significant patient stratifications for both progression-free interval (PFI) and  
82 overall survival (OS) (Fig. 1C, Extended Data Fig. 1B, p < 1e-5 [PFI], p < 1e-5 [OS], multivariate log-  
83 rank test). Thus, a deep learning computer vision model could both mimic and refine clinically standard  
84 categorical nuclear grade assignments in ccRCC.

85 Then, to represent each patient slide compactly, we formed region adjacency graphs (RAGs)  
86 that describe where regions of distinct tumor and grade prediction phenotypes occur in a slide, as well  
87 as whether these regions directly or indirectly contact one another (Methods). In aggregate, this  
88 framework produces a multi-layered, information rich latent representation of ccRCC patient tumor

89 images. Moreover, by condensing the local predictions made by each model, we also represent spatial  
90 patterns that arise between these image-derived features.

91

## 92 **Spatial microheterogeneity in ccRCC**

93 Upon inspection of the model representations, we observed a distinct heterogeneity  
94 phenomenon in continuous nuclear grade prediction graphs: Some WSIs demonstrated co-occurrence  
95 of different grade phenotypes within the same slide, while others were markedly homogeneous. This  
96 co-occurrence, which we termed “microheterogeneity”, can be described in two primary (but not  
97 mutually exclusive) forms: (i) “proximal”, wherein heterogeneity occurred between tumor tissues that  
98 directly contacted one another (Fig. 2A), and (ii) “distal”, wherein stromal barriers or separation in the  
99 slide image interrupted the differing tumor tissues (Fig. 2B). We identified microheterogeneity (any  
100 proximal or distal occurrences) in 40.6% of TCGA-KIRC cases, and 34.7% of CM-025 (Fig. 2C-D,  
101 Extended Data Fig. 9). WSI microheterogeneity was present in varying frequencies within pathologist-  
102 assigned grade labels in each cohort, without any consistent pattern between pathologist grade label  
103 groups (Fig. 2D, frequency of microheterogeneity = 0.36/0.494/0.317 [G2/G3/G4, TCGA-KIRC],  
104 0.524/0.333/0.230 [G2/G3/G4, CM-025]). To produce a continuous measurement of the amount of  
105 microheterogeneity in a single WSI among slides that had microheterogeneity, we calculated the  
106 weighted sum of the number of heterogeneous contacts (RAG edges) per WSI, where larger weights  
107 are given to contacts with similar tumor region areas (Methods). In two independent ccRCC cohorts,  
108 tumors exhibited a wide distribution of microheterogeneity abundance per WSI (Fig. 2E, Extended Data  
109 Fig. 10). Thus, in ccRCC WSIs, distinct nuclear grade patterns create microheterogeneity structures  
110 that can be quantitatively represented as graphs for further investigation.

111

## 112 **Establishing the Linkage Between Micro- and Macro-level Heterogeneity**

113 Given the distribution of microheterogeneity abundance per WSI, we then examined how this  
114 local, slide-level microheterogeneity related to variation throughout a whole tumor  
115 (“macroheterogeneity”). We evaluated a cohort of multiple spatially separated tumor blocks from the  
116 same nephrectomy specimen (Fig. 3A-B, Extended Data Fig. 11). For a given patient’s tumor, the  
117 maximum microheterogeneity abundance in any single WSI correlated with the presence of  
118 microheterogeneity across all WSI from that tumor, and this correlation was not driven by patient  
119 sample size (Fig. 3C, Extended Data Fig. 12A-B). In contrast, variation in image-derived grade scores  
120 did not correlate with sample size or frequency of microheterogeneity (Fig. 3D; Extended Data Fig.  
121 12C-D). Moreover, subsequent predictive modeling demonstrated that a single WSI could predict  
122 microheterogeneity for the remaining WSIs from the same patient (min.  $\log_{10}(\text{Bayes factor}) = 3.04$ ;  
123 Extended Data Fig. 13; Methods). These findings indicate that observing a single reference slide is  
124 predictive of macro-level tumor phenotypes, particularly when that reference slide contains higher  
125 grade phenotypes, and that a single ccRCC WSI encodes latent information regarding spatial  
126 structures present throughout the tumor.

127

## 128 **Molecular correlates of microheterogeneity in ccRCC**

129 Since certain somatic mutations have been associated with macro-level tumor heterogeneity,  
130 we subsequently evaluated whether computationally derived microheterogeneity structures from a  
131 single WSI were associated with recurrent somatic driver mutations in ccRCC, even though direct  
132 prediction of mutations from ccRCC images without multi-layered analysis has thus far been limited<sup>18,19</sup>.

133 WSIs from tumors with somatic *PBRM1* loss of function (LOF), previously associated with molecular  
134 ITH, were also associated with a higher frequency of microheterogeneity compared to WSIs from non-  
135 LOF tumors (Extended Data Fig. 14). We also examined other common driver mutations in ccRCC and  
136 found a similar trend of higher microheterogeneity frequency in *SETD2* LOF mutants, but inconclusive  
137 trends for *BAP1* and *PTEN* (Extended Data Fig. 14). Regarding somatic copy number alterations,  
138 tumors with 9p21.3 deletions, a molecular feature previously implicated in ccRCC oncogenesis<sup>20–22</sup>,  
139 were enriched for microhomogeneity patterns (Extended Data Fig. 14). Thus, microheterogeneity  
140 patterns also encoded features related to recurrent somatic alterations in ccRCC.

141

### 142 **Prognostic relevance of microheterogeneity**

143 Since certain somatic mutations have prognostic value in ccRCC, we assessed whether  
144 computationally derived microheterogeneity from WSIs contained additional prognostic information  
145 beyond pathologist derived nuclear grade. We compared univariate Cox Proportional Hazards models,  
146 using either pathologist assigned grade or computationally inferred continuous grade, to bivariate  
147 models that introduced a binary indicator of whether microheterogeneity was observed. In both  
148 univariate and bivariate models in TCGA-KIRC, continuous grade had a stronger concordance index  
149 (C-Index) for progression free interval (PFI), but not for overall survival (OS) (Extended Data Fig. 15).  
150 Within bivariate models for both survival contexts and grading types, the presence of  
151 microheterogeneity was negatively correlated with survival (hazard ratios all above 1), most notably in  
152 the continuous grade model (Extended Data Fig. 16). Thus, the presence of microheterogeneity in a  
153 single localized, untreated ccRCC WSI can identify tumors with poor prognosis and greater metastatic  
154 potential, consistent with phenomena previously described through using multi-region molecular  
155 profiling<sup>7</sup>.

156

### 157 **Microheterogeneity and response to ICI**

158 In addition to prognostic clinical value, we assessed whether this computer vision derived  
159 feature may be predictive for certain ccRCC therapeutics. We assessed spatial microheterogeneity  
160 patterns within both treatment arms of CM-025, a phase III randomized clinical trial cohort that  
161 compared anti-PD1 blockade (nivolumab) to mTOR inhibition (everolimus) in anti-angiogenic refractory  
162 metastatic ccRCC patients (Methods)<sup>13,23</sup>. Presence of microheterogeneity was associated with  
163 improved OS and PFS in the ICI arm, but not in the mTOR inhibitor arm (Fig. 4A; Extended Data Fig.  
164 17). Given that continuous grade score correlated with OS for each trial arm, we also examined  
165 whether microheterogeneous cases correlated with changes in survival due to having lower overall  
166 grade scores. However, within microheterogeneous cases in the ICI arm, grade score did not contribute  
167 statistically significant predictive signal for PFS or OS, though it trended toward significance for OS  
168 (Fig. 4B, Extended Data Fig. 18). Thus, in CM-025, microheterogeneity was selectively associated with  
169 improved response to ICI even though it was a poor prognostic marker in the primary, untreated setting.

170

### 171 **High immune infiltration combined with grade microheterogeneity identifies a further population** 172 **of ICI responders**

173 Immune infiltration as measured by CD8 immunofluorescence was not associated with  
174 response to ICI<sup>13,24</sup>, despite its predictive value in other immune-responsive cancers. We hypothesized  
175 that TIL patterns may still be relevant for predicting response to ICI in ccRCC, but joint inference of  
176 tumor spatial heterogeneity with TIL patterns are required for adequate context. Thus, we inferred TILs

177 in the CM-025 WSIs and related these features to microheterogeneity (Fig. 5A; Methods). In WSIs with  
178 microheterogeneity, highly infiltrated cases associated with improved OS only in the ICI arm (Fig. 5B;  
179  $p=0.0220$ , log-rank test). This subset of ICI-treated patients also demonstrated a consistent trend in  
180 improved PFS, but did not reach statistical significance (Fig. 5B;  $p=0.0662$ , log-rank test).

181 We also compared the performance of predictive models that exclusively use image-derived or  
182 previously nominated molecular features<sup>13</sup>. For OS in the ICI arm of CM-025, models using computer  
183 vision features had similar performance to those only using genomic features (*PBRM1* LOF, 9p21.3  
184 deletion) (Extended Data Figures 19-28; Methods). Moreover, combining these features resulted in net  
185 improvements while retaining consistent parameter associations (i.e., *PBRM1* LOF and  
186 microheterogeneity each retained positive coefficient weights). We lastly introduced clinical risk  
187 covariates into a full parameter model, which produced further improvements to c-index metrics  
188 (Extended Data Figures 21, 25; Methods). Taken together, tandem consideration of tumor-intrinsic  
189 spatial microheterogeneity and TIL features in WSIs learned by the computer vision models captured  
190 meaningful representations of selective ICI response.

191

### 192 **Tumor-immune interactions are more extensive and involve greater CD8+ PD-1 activation in** 193 **advanced ccRCC**

194 To more precisely understand the tumor-immune spatial interactions identified from WSIs and  
195 linked to selective ICI response, we evaluated advanced ccRCC tumors with paired H&E and multiplex  
196 immunofluorescence (mIF) images derived from the same tissue (markers = {PAX8, CD8, DAPI, PD1,  
197 PDL1, FOXP3})<sup>25,26</sup>. To describe spatial phenotypes, we built a nearest-neighbor graph of CD8+ and  
198 tumor cells, and classified cells as “tumor-immune interacting” if they were adjacent to a distinct cell  
199 type in the graph (Methods). Through analysis of regions with high tumor-immune interaction density  
200 from each patient (Methods), we observed that microheterogeneous tumors had higher CD8+ cell  
201 density, while tumor cell density was similar between heterogeneous and homogeneous cases  
202 (Extended Fig. Data 31-33). The frequency of tumor cells adjacent to CD8+ cells was higher in  
203 heterogeneous cases, suggesting a greater presence of “desert”-like regions of non-infiltrated tumor  
204 tissue in homogeneous cases (Fig. 6C,  $p=0.00215$  [Tumor+, tumor-immune], Wilcoxon Rank-Sum test).  
205 In contrast, the frequency of CD8+ cells adjacent to tumor cells was similar between heterogeneous  
206 and homogeneous cases (Fig. 6C,  $p=0.418$  [CD8+ tumor-immune]). Thus, the observed increase in  
207 tumor-immune interaction frequency in microheterogeneous tumors resulted from increased infiltration  
208 deeper within tumor-dense regions, rather than a uniform increase across the tumor microenvironment.

209 We lastly asked whether any of these observed differences related to tumor-immune cell  
210 subtypes, specifically PD1 low/high CD8+ and PDL1 low/high tumor cells. In general, PD1 high CD8+  
211 cells were common, and PDL1 high tumor cells were sparser (PD1 median freq. = 0.480, PDL1 median  
212 freq. = 0.150; Extended Data Fig. 33). Within CD8+ cells engaged in a tumor interaction,  
213 microheterogeneous cases had a higher frequency of PD1 high cells compared to homogeneous cases  
214 (Fig. 6D,  $p = 0.00908$ , Wilcoxon Rank-Sum test). Thus, spatial microheterogeneity structures in ccRCC,  
215 which exhibited enrichment for ICI response, may foster an immune compartment that is both more  
216 tumor experienced and abundant.

217

### 218 **Discussion**

219 Simultaneous quantitative measurements of key tumor and microenvironmental properties that  
220 represent distinct modes of oncogenesis, evolution, and immune evasion may unlock new insights in

221 ccRCC biology and potential modes of patient stratification. To this end, we developed a series of  
222 biologically informed neural network models to perform spatially aware computer vision analysis on  
223 multiple independent ccRCC cohorts. In doing so, we produced a continuous, quantitative, and  
224 automated grading approach that reproduces existing manual histological assessments of nuclear  
225 grade and provides comparable prognostic value without interobserver variability. More importantly, by  
226 formalizing tumor phenotype predictions into spatial maps and subsequent region adjacency graphs  
227 using a single WSI per patient, we discovered histological intratumoral heterogeneity properties not  
228 feasibly measurable by manual review that were informative for multiple phenomena, and represented  
229 patterns present throughout a patient's tumor. Namely, the graph-based microheterogeneity feature  
230 contained additional prognostic value beyond established pathology scores, as well as predictive value  
231 specifically for response to ICI in CM-025. Furthermore, this feature correlated with a series of  
232 molecular characteristics, such as *PBRM1* LOF, and thus may provide a unified histological  
233 representation for connecting clinically relevant molecular features. Upon simultaneously integrating  
234 tumor and immune microenvironmental features, we identified a subset of ICI responders enriched for  
235 microheterogeneity and a higher degree of TILs. Moreover, microheterogeneity in advanced ccRCC  
236 associated with greater PD1 activation in CD8+ lymphocytes and a greater extent of tumor-immune  
237 interaction, suggesting a more active tumor-immune interaction landscape that is more likely to respond  
238 to ICI. Taken together, these findings suggest that tumor and immune features of ccRCC can be jointly  
239 considered in a spatially aware manner to guide biological and clinical investigations using widely  
240 available H&E WSIs.

241 There are several challenges and limitations to this analysis. The histological data analyzed  
242 from CM-025 consisted of pre-treatment primary tumor samples, and thus may differ from the tumor  
243 state at the time of trial accrual due to ongoing tumor evolution. As such, the specimens we analyzed  
244 may be uncoupled from eventual metastatic progression. Similarly, larger sample sizes in additional  
245 clinical cohorts are necessary to generalize these findings to the evolving combination treatment  
246 landscapes of ccRCC, and additional histologic features could be added to our model framework (e.g.  
247 necrosis, TIL subtypes). While we were able to provide an orthogonal glimpse at the specific cell  
248 populations that might underlie the tumor-immune phenotypes associated with microheterogeneity, our  
249 analysis of paired mIF and H&E data also had key limitations. In particular, the sample size was small  
250 and composed of varying biopsy sites, and larger paired cohorts representing diverse biopsy sites will  
251 guide extensions of these observations.

252 Taken together, we propose spatially aware deep learning models that build upon inference of  
253 known histological features (e.g. nuclear grade) to learn interacting new features (graph-based  
254 microheterogeneity) and reveal distinct oncogenic paths and ICI response phenotypes in ccRCC. The  
255 occurrence of microheterogeneity and its predictive capacity for PFS and OS in ICI warrants further  
256 study, including via model systems, to unravel how this phenomenon influences tumor evolution and  
257 anti-tumor immunity. Broadly, the use of biologically guided computer vision strategies for cancer  
258 histopathology to automatically infer tumor and microenvironmental features, their respective higher-  
259 order interactions, and their relationship to molecular and clinical states may have general utility across  
260 tumor types and therapeutic modalities.

261  
262  
263  
264

## 265 **Methods**

### 266 *Clinical Cohorts*

267 Three distinct patient cohorts were used in the analysis: TCGA-KIRC, the CheckMate 025 (CM-025)  
268 phase III clinical trial (NCT01668784), and the DFCI-PROFILE of ccRCC patients from the Dana-Farber  
269 Cancer Institute (also under DFCI IRB #20-293 and 20-376). Additional datasets include a set of multi-  
270 block nephrectomy samples from Dana-Farber/Brigham (under DFCI IRB #20-293 and 20-376), and  
271 multiplexed immunofluorescence data from Dana-Farber/Brigham the ImmunoProfile project (under  
272 DFCI IRB #20-293 and 20-376).

273

### 274 *Data Acquisition*

275 For the TCGA-KIRC cohort, we obtained clinical data, and normalized bulk RNA and genomic  
276 sequencing from the GDC PanCanAtlas (<https://gdc.cancer.gov/about-data/publications/pancanatlas>),  
277 and downloaded whole-slide H&E stained diagnostic images from the ISB-CGC mirror of TCGA data.  
278 For the CheckMate 025 cohort, we directly obtained H&E stained diagnostic images from the Signoretti  
279 Lab via an established Bristol Myers Squibb IION agreement, and used clinical and molecular data  
280 previously generated by Braun et al., 2020 (European Genome-Phenome Archive: EGAS00001004290,  
281 EGAS00001004291, EGAS00001004292). DFCI-PROFILE images were obtained via the Dana-  
282 Farber/Brigham and Women's PROFILE project. Multiplexed Immunofluorescence (and accompanying  
283 H&E images) were obtained via the Dana-Farber/Brigham and Women's ImmunoProfile project. Multi-  
284 block nephrectomy images were obtained from the Signoretti Lab. These images are available upon  
285 request with provision of IRB and adherence to institutional policies regarding storage security and  
286 other parameters.

287

### 288 *Truncating mutation categorization*

289 When considering somatic alterations, we consider mutations only if they are truncating (likely loss of  
290 function). Within MAF annotation data, this comprised the following variant categories:  
291 {'Nonsense\_Mutation', 'Frame\_Shift\_Ins', 'Frame\_Shift\_Del', 'Splice\_Site'}.

292

### 293 *Image Quality Control*

294 Quality control of H&E whole-slide images was performed using the HistoQC<sup>27</sup> toolkit. A full set of  
295 modules used is available as a `.ini` file. Custom examples used to train pen detection modules are  
296 available in a forked repository (<https://github.com/jmnyman/HistoQC>). Following HistoQC filtration, we  
297 further removed small slide images with fewer than 500 tiles (512px at 20X resolution).

298

### 299 *Cross Validation*

300 Training and validation were performed in the DFCI-PROFILE cohort, with additional testing done in the  
301 TCGA-KIRC and CM-025 cohorts. In subsequent finetuning experiments for tumor and grade  
302 classification, we utilized 4-fold cross-validation. Each dataset was split into folds at the patient level to  
303 ensure no patient-level information bled between training and validation contexts. Datasets were then  
304 subsampled to ensure a balanced label composition. Following balanced patient-level fold creation, we  
305 then sample a fixed number (per specified hyperparameters) of 512 pixel tiles (20X) from each patient  
306 slide to create folds that were label-balanced.

307

308

### 309 *Tumor Classification*

310 A model to classify general renal cell carcinoma tumor tissue versus adjacent normal stromal tissue  
311 was trained using pixel-level pathologist annotations from the DFCI-PROFILE cohort (n=36 slides).  
312 Following quality control, training data slides were split into 512 pixel tiles (20X), and assigned labels  
313 according to pathologist annotations (ie, whether a region contained tumorous tissue or not). A  
314 pretrained ResNet-50 neural network model was then finetuned using color jitter, and the highest  
315 performing model in a series of 4-fold cross validation was selected for subsequent inference. All neural  
316 network architecture and training code used the PyTorch and PyTorch-Lightning libraries, and 1-2  
317 NVIDIA Tesla V100 GPU units on Google Cloud VM instances<sup>28,29</sup>. Hyperparameters used for training  
318 are available in the project repository.

319

### 320 *Tumor Grading*

321 A second finetuned ResNet-50 neural network model was trained to distinguish low (G2) from high (G4)  
322 ccRCC cases from the DFCI-PROFILE cohort (n=190 slides). This cohort contained samples collected  
323 prior to and following the adoption of the WHO/ISUP grading changes, and as such contains both  
324 Fuhrman and WHO/ISUP grades<sup>6</sup>. These conventions share significant overlap and are generally  
325 highly concordant<sup>30</sup>. Additionally, manual review for sarcomatoid and rhabdoid (S/R) tumor content  
326 was previously performed, and cases with S/R content were upgraded to G4 if previously assigned a  
327 lower grade to ensure greater concordance with WHO/ISUP guidelines. Following quality control,  
328 training data slides were again split into 512 pixel tiles (20X), and tiles were assigned labels according  
329 to pathologist annotation of the source slide. Tiles were only considered for model training if their  
330 predicted probability of containing tumor tissue was  $\geq 0.7$ , and slides were restricted to those with at  
331 least 500 putative tumor-containing tiles. A pretrained ResNet-50 neural network model was again  
332 finetuned using heavy color jitter. An ensemble composed of each model trained in 4-fold cross  
333 validation was then used for subsequent inference, taking the average across all model softmax  
334 outputs to make predictions. All neural network architecture and training code used the PyTorch and  
335 PyTorch-Lightning libraries, and 1-2 NVIDIA Tesla V100 GPU units on Google Cloud VM instances  
336<sup>28,29</sup>. Hyperparameters used for training are available in the project repository.

337

### 338 *Inference Post-Processing*

339 Following tumor and grade inference, tile-level model scores were smoothed using uniform nearest  
340 neighbor averaging (n=4 nearest tiles). For grade score smoothing, we considered tiles if their  
341 predicted probability of containing tumor tissue was  $\geq 0.5$ . Smoothed tumor and grade scores were  
342 used for all downstream analysis.

343

### 344 *Phenotype Segmentation*

345 Regions of tumor tissue were identified using watershed segmentation in scikit-image<sup>31</sup>. We first  
346 performed segmentation on smoothed tumor prediction scores, and classified regions as “tumor” if their  
347 average segment score was  $\geq 0.7$ . Following an initial watershed segmentation, regions were merged  
348 if they were similar (region score difference  $< 0.2$ ). These putative tumor regions were then considered  
349 for secondary segmentation using smoothed grade scores to identify regions of distinct grade.  
350 Furthermore, a slide-average grade score was obtained using the average grade score across all  
351 putative tumor area.

352



### 353 *Adjacency Descriptions*

354 Following watershed segmentation of tumor and grade scores, we represented each slide as a region  
355 adjacency graph<sup>32</sup> (RAG) to describe the connectivity of each region produced, wherein directly  
356 contacting regions are assigned an edge in the graph. Small area nodes were removed ( $n < 50$  total  
357 tiles) following RAG construction. Subsequently, we performed a series of segmentation expansions to  
358 recover missing connectivity locally (e.g., regions that are visually in contact, but are separated by a  
359 thin layer of non-tumor predicted area), and also to describe long-range differences (e.g., regions that  
360 are distinct in grade score, but separated by 10+ tiles). RAG edges forming either directly or at an  
361 expansion distance of 1 tile were classified as “proximal”, and those forming at an expansion distance  
362 of up to 25 tiles were classified as “distal”. In analyses using TIL predictions, we only considered edges  
363 containing at least one node with an average grade score above 0.8 (see *Tumor Infiltration*  
364 *Classification*).

### 366 *Heterogeneity Description*

367 Patients with at least one proximal or distal RAG edge were classified as “heterogeneous”, and those  
368 lacking any edges as “homogeneous”. In analyses using TIL predictions, we only considered  
369 proximal/distal edges containing at least one node with an average grade score above 0.8 (see *Tumor*  
370 *Infiltration Classification*). To describe microheterogeneity continuously, we derived two related metrics.  
371 First was a “total-weighted” heterogeneity score (t-HS), we calculated a weighted sum of the number of  
372 RAG edges, wherein each edge was weighted by the total fractional tumor area occupied by the node  
373 pair involved in that edge (e.g., if two nodes comprise nearly all of the tumor area, that edge is highly  
374 weighted, while smaller regions contribute less to the sum). The second score was “f-weighted” (f-HS),  
375 and instead used the harmonic mean of the area fractions of each node in an edge to produce a  
376 weight, which describes both the contribution scale and balance of the nodes involved in that edge.

### 378 *Reference Slide Modeling*

379 Null models were configured for each case based on the number of blocks available for a given patient  
380 (1 H&E stained slide per block,  $n=21$  patients, minimum 3 blocks, average = 4.57 blocks, median = 4  
381 blocks, max = 10 blocks), and a Beta prior was set according to the empirical observations of  
382 microheterogeneity in the CM-025 cohort (prior parameters:  $a=148$ ,  $b=279$ ). Alternative models for each  
383 patient were configured by first setting a uniform prior ( $a=1$ ,  $b=1$ ), and then updating based on the  
384 microheterogeneity status of a reference slide (e.g.,  $\{a=2, b=1\}$  when observing microheterogeneous  
385 reference). We selected the reference slide based on grade score in 4 different ways: highest slide-  
386 average, highest by segment, highest by segment (with 10% area minimum), and highest by segment  
387 (with 25% area minimum). We also considered near-ties, considering a tie if two candidate grade  
388 scores were within 0.01 of each other, taking the average log likelihood of the competing alternative  
389 models for a given patient when comparing to the null in downstream testing. Comparison testing was  
390 done with a log-likelihood ratio test. Bayes factors were calculated analytically under beta-binomial  
391 distributions.

### 393 *Tumor Infiltrating Lymphocyte Inference*

394 A HoVerNet model trained on the PanNuke dataset was used for nuclei segmentation<sup>17,33</sup>. We  
395 leveraged the implementation and pretrained model from the PathML toolkit<sup>34</sup> for computational  
396 pathology (<https://github.com/Dana-Farber-AIOS/pathml>). While this pretrained model produces

397 accurate nucleus segmentation, its subtype classification notably fails on clear cell renal carcinoma,  
398 likely due to a near-absence of this histology within PanNuke. Consequently, we finetuned the  
399 classification head of the model to predict tumor-context vs stromal-context nuclei using a pseudo-  
400 labeling scheme; nuclei in a tile were randomly assigned “tumor nuclei” labels proportionally to the  
401 predicted probability produced by the tumor classifier (ex., 90% of nuclei randomly assigned “tumor  
402 nuclei” if tumor score == 0.9). Following inference, we further stratified nuclei predicted to be “tumor-  
403 context nuclei” to distinguish tumor cells from infiltrating lymphocytes (TILs) using heuristic cutoffs  
404 chosen via manual pathologist review; lymphocytes were selected by a combined criteria of increased  
405 circularity, smaller area, and darker pixels.

406

#### 407 *Tumor Infiltration Classification*

408 Following nuclei inference, we aggregated nuclei calls at the tile-level, and classified a tile as  
409 “infiltrated” if it contained 14 or more TILs, a cutoff selected by maximizing concordance with  
410 pathologist annotations for the presence of lymphocytes in a given tile (Extended Data Fig. 4;  
411 bootstrapped AUROC comparing “infiltrated” vs “non-infiltrated” tile-level labels). We then considered  
412 region-level descriptions of infiltration, describing the proportion of tiles above the “infiltrated” cutoff as  
413 the “area infiltration fraction”. Next, we binarized samples into “low” versus “high” infiltration by splitting  
414 at the median area infiltration fraction value (cutoff = 15.16%). This was restricted to high-grade regions  
415 (grade score  $\geq 0.8$ ) to avoid excessive false positive infiltration calls, as lower-grade ccRCC nuclei can  
416 be visually ambiguous from TILs, even to expert pathologists (n=256 patient slides post filtration) (See  
417 Extended Data Figures 5-7). Area infiltration fraction as determined by H&E-inference showed general  
418 agreement with CD8+ immunofluorescence measurements where overlap existed (See Extended Data  
419 Fig. 7]).

420

#### 421 *Survival Analysis*

422 Survival analysis in the TCGA-KIRC And CM-025 cohorts was performed using the python package  
423 *Lifelines*<sup>35</sup>. Kaplan-Meier regression and plotting was performed using the *KaplanMeierFitter* function  
424 with default parameters, and multivariate Cox Proportional Hazards regression was performed using  
425 the *CoxPHFitter* function with moderate regularization (L1 ratio = 0.1 [multivariate models], L1 ratio = 0  
426 [univariate models], penalizer scale = 0.1 [multivariate models], penalizer = 0.0 [univariate models]). We  
427 also further excluded slide images with fewer than 200 tiles predicted to contain tumor tissue. We  
428 considered only slides obtained from primary biopsy sites, excluding metastatic biopsies to remain  
429 consistent between cohorts. When annotations were available, we excluded Grade 1 (G1) cases due to  
430 their rarity. We only considered cases where watershed segmentation successfully produced at least  
431 one segment containing 50 or more tiles with an average tumor score  $\geq 0.7$ . When describing TIL  
432 infiltration content in CM-025 in Kaplan-Meier curves, we used binary (lower/higher) groups as  
433 described above, and continuous area infiltration fraction for Cox modeling.

434

#### 435 *Image Registration*

436 We adapted PathFlow MixMatch, displacing an input H&E image against a fixed mIF image at 1.25X,  
437 and using GPU acceleration (Tesla V100) when learning each case’s alignment/displacement tensor.  
438 Learned displacement tensors were then used to shift H&E-based grade segmentation maps into the  
439 same coordinate space as mIF data. These aligned maps were then used in K-nearest neighbors  
440 regression to assign cell predictions in the mIF data to a grade segmentation label. Since the image

441 pairs are not from the same exact tissue section, alignments were assessed visually via overlay to  
442 assess quality, resulting in 13 total passing cases. Within successful alignments, putative tumor regions  
443 were manually reviewed, resulting in omission of two false-positive regions (adjacent metastatic tissue  
444 misclassified as “tumor”).

445

#### 446 *Multiplexed Immunofluorescence Image Preprocessing*

447 To first predict cellular locations, we used a pretrained Mesmer model <sup>36</sup>, which produced a candidate  
448 mask of cell segmentations for each mIF WSI. We used DAPI as the “nuclear channel”, and PAX8 with  
449 CD8 as the “membrane channels”. Full resolution (20X) mIF images were broken into 10,000 pixel  
450 bands as batch inputs to Mesmer using GPU acceleration (Tesla V100). A subset of images (3) that  
451 failed this batch procedure were re-run with 2500 pixel square tiles as batched inputs. To quantify area-  
452 normalized cellular expression, we used the Ark analysis toolkit’s `create\_marker\_count\_matrix`  
453 function <sup>36,37</sup>, which produces a description of each predicted cell segmentation that contains both  
454 morphological and arcsinh-transformed, area-normalized expression values.

455

#### 456 *Cell Phenotype Calling*

457 Following expression quantification, we inspected the histograms of each case’s channel values, as  
458 well as the ratio of CD8+ : Autofluorescence, and determined manual cutoffs to gate each primary cell  
459 population (CD8+ vs Tumor+ vs ungated). These cutoffs were then used to make a coarse-grained  
460 estimate of each cell subpopulation. We then performed an orthogonal clustering analysis, using cell  
461 expression and morphology features produced by the Ark toolkit (*{centroid\_dif, num\_concavities,*  
462 *convex\_hull\_resid, major\_axis\_equiv\_diam\_ratio, perim\_square\_over\_area, arcsinh(Cell Area)}*) and  
463 the Louvain method for community detection in scanpy (number of principal components = 5, nearest  
464 neighbors=15, cluster resolution=10) <sup>38,39</sup>. Cells with low DAPI (<7 arcsinh units) were also excluded.  
465 Clusters with outlier morphology (>50% of its cells having 3+ features outside of 5th/95th percentile  
466 values), or high autofluorescence-to-CD8+ signal (>35% below case-specific CD8+ : Autofluorescence  
467 ratio cutoffs) were excluded. Remaining clusters were assigned to “CD8+” or “Tumor+” identities if at  
468 least 60% of a cluster’s cells were assigned that label when using purely manual cutoffs. Remaining  
469 cells were labeled “ungated” and excluded from downstream analysis. To determine cell  
470 subpopulations, we subsetted each primary cell population (CD8+, Tumor+), and fit a linear regression  
471 model of autofluorescence vs submarker expression, using the resulting residuals as a noise-corrected  
472 expression value. Resulting submarker distributions (PDL1 for Tumor+ cells and PD1 for CD8+ cells)  
473 were inspected, and binary cutoffs were chosen for each case individually. We lastly performed a  
474 filtering of false-positive tumor cell predictions which exhibited high PAX8 and high DAPI (likely to be B  
475 cell lineage), and again used manual histogram inspection to remove the DAPI-high subpopulation.

476

#### 477 *Cell graph construction*

478 To construct a graph of cell-interactions, we first removed ungated cells, and then performed Delaunay  
479 triangulation with a maximum radius of 100px to form a parsimonious nearest neighbor graph. We then  
480 defined “self” interactions as edges between cells of the same type (e.g. CD8+), and “tumor-immune”  
481 interactions as those occurring between CD8+ and Tumor+ cells. Cells disconnected from the graph  
482 were deemed “isolated”, and grouped with “self” interactions for downstream analysis.

483

484

## 485 *Immune Hotspot Analysis*

486 To select regions of interest with high tumor-immune activity, we split full resolution mIF WSI data into  
487 tiles 2000px (approx 1mm) wide, and further selected for regions with at least 50% area overlap with  
488 H&E-inferred tumor region predictions. We then filtered for regions with at least 50 CD8+ and 50  
489 Tumor+ cells that were engaged in tumor-immune interactions. From each patient slide, we sampled up  
490 to 10 hotspots, selecting those with the most CD8+ density involved in tumor-immune interactions  
491 (min=2 samples, mean=9.0 samples; 42 total microheterogeneous samples [n=5 slides], 57 total  
492 microhomogeneous samples [n=6 slides]) (See Extended Data Figures 28-29). Two patients lacked  
493 any hotspots and were excluded from this analysis.

494

## 495 *Statistical Testing*

496 All statistical analysis was performed using python 3. For comparison of group counts, Fisher's Exact  
497 test was used via the scipy function *fisher\_exact*<sup>40</sup>. Other continuous, score-based comparisons were  
498 performed using a two-sided Wilcoxon rank-sum (Mann-Whitney U) test using the *statannotations*  
499 package to directly annotate Seaborn plots with p-value results<sup>41,42</sup>. For survival analyses, cohort  
500 subgroup survival distributions were compared using the log-rank test using the  
501 *multivariate\_logrank\_test* and *pairwise\_logrank\_test* functions in *Lifelines*. For Cox models, the  
502 concordance index (C-Index) and (Log) Likelihood Ratio Test (LLRT) were used to evaluate goodness  
503 of fit. When comparing continuous to categorical grade, the relative likelihood was estimated using the  
504 partial AIC produced for each Cox model, and interpreted as the probability one model minimizes the  
505 AIC of the other. Barplot error bars indicated standard error. Boxplot elements are as follows: center  
506 line, median; box limits, upper and lower quartiles; whiskers, 1.5 interquartile range (IQR); points,  
507 outliers past 1.5 IQR. Violinplot dotted interior lines indicate median, and upper and lower quartiles.

508

## 509 **Data Availability**

510 Restrictions apply to the availability of the raw in-house and external data, which were used with  
511 institutional permission through IRB approval for the current study, and are thus not publicly available.  
512 Please email all requests for academic use of raw and processed data to DFCI Contracts Team  
513 (ContractsTeam@DFCI.HARVARD.EDU). All requests will be evaluated based on institutional and  
514 departmental policies to determine whether the data requested is subject to intellectual property or  
515 patient privacy obligations. Data can only be shared for non-commercial academic purposes and will  
516 require a formal Data Use Agreement.

517

## 518 **Code Availability**

519 Code used to perform the analyses described in this study will be made available in a public github  
520 repository upon publication.

521

## 522 **Acknowledgements**

523 This work was supported in part by Bristol Myers Squibb through its International Immuno-Oncology  
524 Network.

525 The results shown here are also in part based upon data generated by the TCGA Research Network:  
526 <https://www.cancer.gov/tcga>. This work was supported by Dana-Farber/Harvard Cancer Center Kidney  
527 SPORE (P50CA101942-15). This work was also supported in part by the National Institutes of Health  
528 (R37 CA222574, R01CA227388, P50CA191842 [E.M.V.A.]; T32GM007753 [N.M.]; P30CA016359

529 [D.A.B.]; F31 CA250136 [J.N.]), a Dunkin' Donuts Breakthrough Grant [J.N., E.M.V.A.], and the DOD  
530 Academy of Kidney Cancer Investigators (KC190128) [D.A.B.]. T.K.C. is supported in part by the  
531 Kohlberg Chair at Harvard Medical School and the Trust Family, Michael Brigham, and Loker Pinard  
532 Funds for Kidney Cancer Research at DFCI.

533

### 534 **Author Contributions**

535 Conceptualization - J.N., E.M.V.A, S.S., D.A.B., S.S., T.K.C.; Formal analysis - J.N. ; Interpretation of  
536 the data - S.N.H, B.J., N.M., C.L., Z.B., T.D., D.A.B., K.B., B.M.T; Resources - R.U., J.R.; Data curation  
537 & annotation - T.D., Z.B., C.L., S.S., S.R., K.F., B.S.; Writing (original draft) - J.N., E.M.V.A; Writing  
538 (reviewing and editing) - S.S., D.A.B., S.S., T.K.C., B.J., N.M., S.N.H, K.B., B.M.T; Visualization - J.N.;  
539 Supervision - E.M.V.A, S.S., T.K.C.; Funding acquisition - E.M.V.A, S.S., T.K.C.

540

### 541 **Competing Interests**

542 T.K.C reports institutional and personal, paid and unpaid support for research, advisory boards,  
543 consultancy, and honoraria from: AstraZeneca, Aravive, Aveo, Bayer, Bristol Myers-Squibb, Calithera,  
544 Circle Pharma, Eisai, EMD Serono, Exelixis, GlaxoSmithKline, IQVA, Infinity, Ipsen, Jansen, Kanaph,  
545 Lilly, Merck, Nikang, Nuscan, Novartis, Pfizer, Roche, Sanofi/Aventis, Surface Oncology, Takeda,  
546 Tempest, Up-To-Date, CME events (Peerview, OncLive, MJH and others), outside the submitted work;  
547 institutional patents filed on molecular mutations and immunotherapy response, and ctDNA; equity in  
548 Tempest, Pionyr, Osel, NuscanDx. T.K.C serves on the committees of NCCN, GU Steering Committee,  
549 ASCO/ESMO. Medical writing and editorial assistance support may have been funded by  
550 Communications companies in part. No speaker's bureau. Mentored several non-US citizens on  
551 research projects with potential funding (in part) from non-US sources/Foreign Components. The  
552 institution (Dana-Farber Cancer Institute) may have received additional independent funding of drug  
553 companies or/and royalties potentially involved in research around the subject matter. E.M.V.A. reports  
554 advisory/consulting with Tango Therapeutics, Genome Medical, Invitae, Monte Rosa, Enara Bio,  
555 Manifold Bio, Riva Therapeutics, Serinus Bio, and Janssen; research support from Novartis and BMS;  
556 equity in Tango Therapeutics, Genome Medical, Syapse, Manifold Bio, Monte Rosa, Enara Bio, Riva  
557 Therapeutics, Serinus Bio; Patents: Institutional patents filed on chromatin mutations and  
558 immunotherapy response, and methods for clinical interpretation; intermittent legal consulting on  
559 patents for Foaley & Hoag. D.A.B. reports personal fees from LM Education and Exchange, Adnovate  
560 Strategies, MDedge, Cancer Network, Cancer Expert Now, OncLive, Catenion, AVEO, and grants and  
561 personal fees from Exelixis, outside the submitted work. C.L. reports research funding from  
562 Genentech/imCORE. Z.B. reports research funding from Bristol-Myers Squibb & Genentech/imCORE;  
563 Honoraria from UpToDate. S.S. reports grants from Exelixis, grants from Bristol-Myers Squibb,  
564 personal fees from Merck, grants and personal fees from AstraZeneca, personal fees from CRISPR  
565 Therapeutics, personal fees from NCI, and personal fees from AACR; a patent for Biogenex with  
566 royalties paid. K.B. has consulted for Related Sciences (RS) outside of the scope of this work. SR  
567 receives research funding from Bristol-Myers Squibb and KITE/Gilead, and is a member of the SAB for  
568 Immunitas Therapeutics.

569

570

### 571 **References**

- 572 1. Hsieh, J. J. *et al.* Renal cell carcinoma. *Nat Rev Dis Primers* **3**, 17009 (2017).
- 573 2. Gerlinger, M. *et al.* Intratumor heterogeneity and branched evolution revealed by multiregion  
574 sequencing. *N. Engl. J. Med.* **366**, 883–892 (2012).
- 575 3. Turajlic, S. *et al.* Tracking Cancer Evolution Reveals Constrained Routes to Metastases:  
576 TRACERx Renal. *Cell* **173**, 581–594.e12 (2018).
- 577 4. Mitchell, T. J. *et al.* Timing the Landmark Events in the Evolution of Clear Cell Renal Cell Cancer:  
578 TRACERx Renal. *Cell* **173**, 611–623.e17 (2018).
- 579 5. Turajlic, S. *et al.* Deterministic Evolutionary Trajectories Influence Primary Tumor Growth:  
580 TRACERx Renal. *Cell* **173**, 595–610.e11 (2018).
- 581 6. Delahunt, B. *et al.* The International Society of Urological Pathology (ISUP) grading system for  
582 renal cell carcinoma and other prognostic parameters. *Am. J. Surg. Pathol.* **37**, 1490–1504 (2013).
- 583 7. Zhao, Y. *et al.* Selection of metastasis competent subclones in the tumour interior: TRACERx  
584 renal. Preprint at <https://doi.org/10.21203/rs.3.rs-61979/v1>.
- 585 8. Sirohi, D. *et al.* Histologic Growth Patterns in Clear Cell Renal Cell Carcinoma Stratify Patients into  
586 Survival Risk Groups. *Clin. Genitourin. Cancer* **20**, e233–e243 (2022).
- 587 9. Ghatalia, P. *et al.* Prognostic impact of immune gene expression signature and tumor infiltrating  
588 immune cells in localized clear cell renal cell carcinoma. *J Immunother Cancer* **7**, 139 (2019).
- 589 10. Choueiri, T. K. & Motzer, R. J. Systemic Therapy for Metastatic Renal-Cell Carcinoma. *N. Engl. J.*  
590 *Med.* **376**, 354–366 (2017).
- 591 11. Miao, D. *et al.* Genomic correlates of response to immune checkpoint therapies in clear cell renal  
592 cell carcinoma. *Science* **359**, 801–806 (2018).
- 593 12. Braun, D. A. *et al.* Clinical Validation of PBRM1 Alterations as a Marker of Immune Checkpoint  
594 Inhibitor Response in Renal Cell Carcinoma. *JAMA Oncol* **5**, 1631–1633 (2019).
- 595 13. Braun, D. A. *et al.* Interplay of somatic alterations and immune infiltration modulates response to  
596 PD-1 blockade in advanced clear cell renal cell carcinoma. *Nat. Med.* **26**, 909–918 (2020).
- 597 14. Diao, J. A. *et al.* Human-interpretable image features derived from densely mapped cancer  
598 pathology slides predict diverse molecular phenotypes. *Nat. Commun.* **12**, 1613 (2021).
- 599 15. Tellez, D., Litjens, G., van der Laak, J. & Ciompi, F. Neural Image Compression for Gigapixel  
600 Histopathology Image Analysis. *arXiv [cs.CV]* (2018).
- 601 16. He, K., Zhang, X., Ren, S. & Sun, J. Deep Residual Learning for Image Recognition. *arXiv [cs.CV]*  
602 (2015).
- 603 17. Graham, S. *et al.* Hover-Net: Simultaneous segmentation and classification of nuclei in multi-tissue  
604 histology images. *Med. Image Anal.* **58**, 101563 (2019).
- 605 18. Acosta, P. H. *et al.* Intratumoral Resolution of Driver Gene Mutation Heterogeneity in Renal Cancer  
606 Using Deep Learning. *Cancer Res.* **82**, 2792–2806 (2022).
- 607 19. Fu, Y. *et al.* Pan-cancer computational histopathology reveals mutations, tumor composition and  
608 prognosis. *bioRxiv* 813543 (2019) doi:10.1101/813543.
- 609 20. Baietti, M. F. *et al.* Loss of 9p21 Regulatory Hub Promotes Kidney Cancer Progression by  
610 Upregulating HOXB13. *Mol. Cancer Res.* **19**, 979–990 (2021).
- 611 21. El-Mokadem, I. *et al.* Significance of chromosome 9p status in renal cell carcinoma: a systematic  
612 review and quality of the reported studies. *Biomed Res. Int.* **2014**, 521380 (2014).
- 613 22. Bakouny, Z. *et al.* Integrative molecular characterization of sarcomatoid and rhabdoid renal cell  
614 carcinoma. *Nat. Commun.* **12**, 808 (2021).
- 615 23. Motzer, R. J. *et al.* Nivolumab versus Everolimus in Advanced Renal-Cell Carcinoma. *N. Engl. J.*  
616 *Med.* **373**, 1803–1813 (2015).
- 617 24. Fridman, W. H., Zitvogel, L., Sautès-Fridman, C. & Kroemer, G. The immune contexture in cancer  
618 prognosis and treatment. *Nat. Rev. Clin. Oncol.* **14**, 717–734 (2017).
- 619 25. Carey, C. D. *et al.* Topological analysis reveals a PD-L1-associated microenvironmental niche for  
620 Reed-Sternberg cells in Hodgkin lymphoma. *Blood* **130**, 2420–2430 (2017).
- 621 26. Griffin, G. K. *et al.* Spatial signatures identify immune escape via PD-1 as a defining feature of T-  
622 cell/histiocyte-rich large B-cell lymphoma. *Blood* **137**, 1353–1364 (2021).

- 623 27. Janowczyk, A., Zuo, R., Gilmore, H., Feldman, M. & Madabhushi, A. HistoQC: An Open-Source  
624 Quality Control Tool for Digital Pathology Slides. *JCO Clin Cancer Inform* **3**, 1–7 (2019).
- 625 28. Paszke, A. *et al.* PyTorch: An Imperative Style, High-Performance Deep Learning Library. in  
626 *Advances in Neural Information Processing Systems* (eds. Wallach, H. *et al.*) vol. 32 (Curran  
627 Associates, Inc., 2019).
- 628 29. Falcon, W. The PyTorch Lightning team. *Pytorch lightning* **3**, 6 (2019).
- 629 30. Dagher, J. *et al.* Clear cell renal cell carcinoma: validation of World Health  
630 Organization/International Society of Urological Pathology grading. *Histopathology* **71**, 918–925  
631 (2017).
- 632 31. van der Walt, S. *et al.* scikit-image: image processing in Python. *PeerJ* **2**, e453 (2014).
- 633 32. Trémeau, A. & Colantoni, P. Regions adjacency graph applied to color image segmentation. *IEEE*  
634 *Trans. Image Process.* **9**, 735–744 (2000).
- 635 33. Gamper, J., Alemi Koohbanani, N., Benet, K., Khuram, A. & Rajpoot, N. PanNuke: An Open Pan-  
636 Cancer Histology Dataset for Nuclei Instance Segmentation and Classification. in *Digital Pathology*  
637 11–19 (Springer International Publishing, 2019).
- 638 34. Rosenthal, J. *et al.* Building Tools for Machine Learning and Artificial Intelligence in Cancer  
639 Research: Best Practices and a Case Study with the PathML Toolkit for Computational Pathology.  
640 *Mol. Cancer Res.* (2021) doi:10.1158/1541-7786.MCR-21-0665.
- 641 35. Davidson-Pilon, C. *lifelines, survival analysis in Python.* (2021). doi:10.5281/zenodo.5745573.
- 642 36. Greenwald, N. F. *et al.* Whole-cell segmentation of tissue images with human-level performance  
643 using large-scale data annotation and deep learning. *Nat. Biotechnol.* **40**, 555–565 (2022).
- 644 37. Liu, C. C. *et al.* Robust phenotyping of highly multiplexed tissue imaging data using pixel-level  
645 clustering. *bioRxiv* 2022.08.16.504171 (2022) doi:10.1101/2022.08.16.504171.
- 646 38. Wolf, F. A., Angerer, P. & Theis, F. J. SCANPY: large-scale single-cell gene expression data  
647 analysis. *Genome Biol.* **19**, 15 (2018).
- 648 39. Blondel, V. D., Guillaume, J.-L., Lambiotte, R. & Lefebvre, E. Fast unfolding of communities in  
649 large networks. *Journal of Statistical Mechanics: Theory and Experiment* vol. 2008 P10008  
650 Preprint at <https://doi.org/10.1088/1742-5468/2008/10/p10008> (2008).
- 651 40. Virtanen, P. *et al.* SciPy 1.0: fundamental algorithms for scientific computing in Python. *Nat.*  
652 *Methods* **17**, 261–272 (2020).
- 653 41. Charlier, F. *statannotations: add statistical significance annotations on seaborn plots. Further*  
654 *development of statannot, with bugfixes, new features, and a different API.* (Github).
- 655 42. Waskom, M. seaborn: statistical data visualization. *J. Open Source Softw.* **6**, 3021 (2021).

a

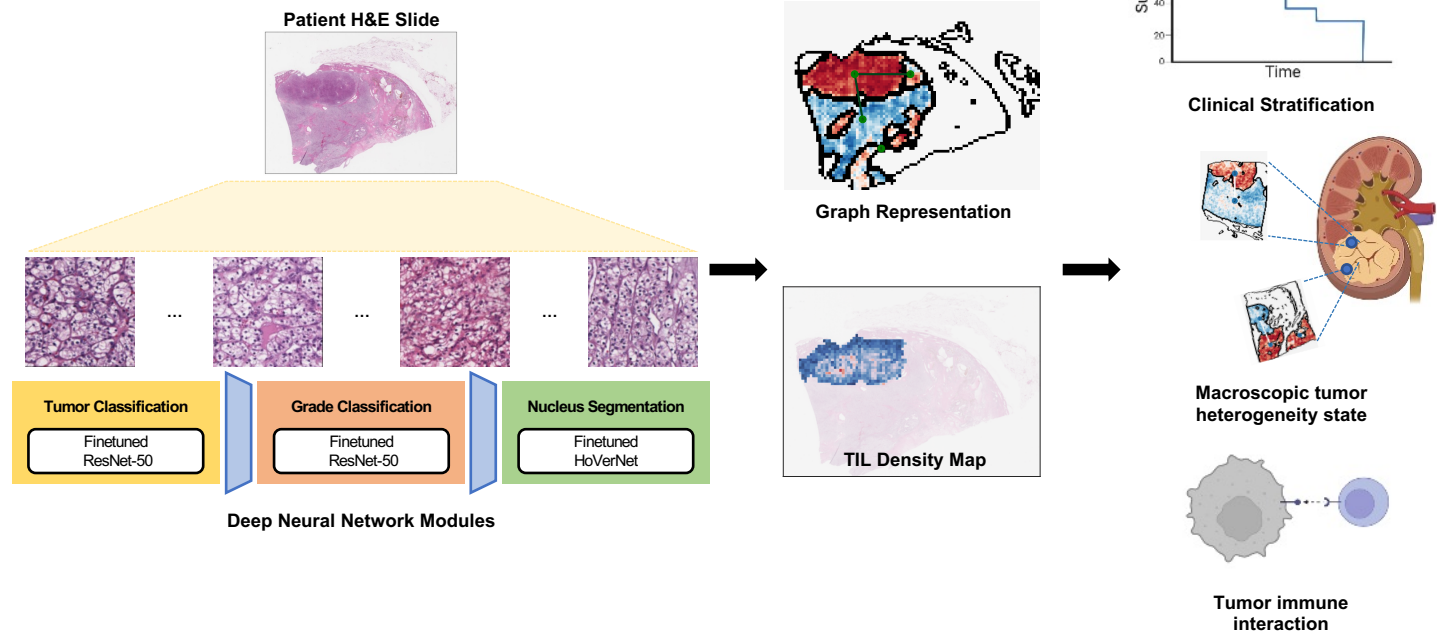

b

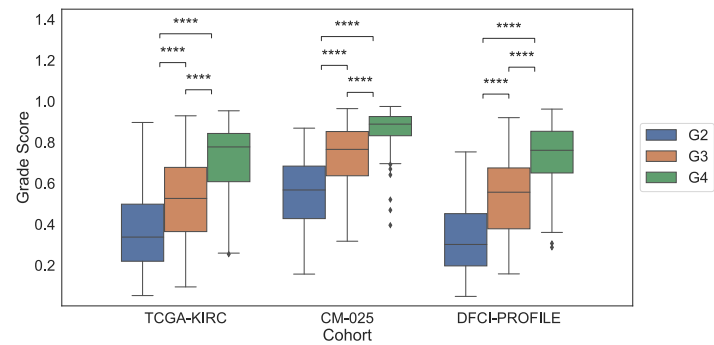

c

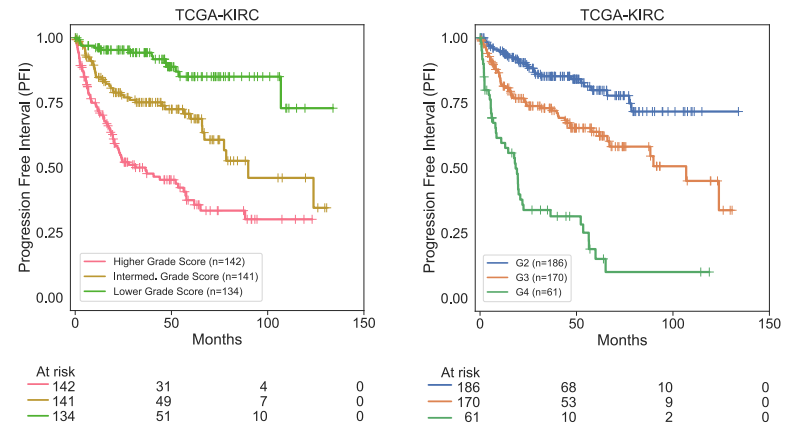

**Figure 1: A spatially aware deep learning framework for studying ccRCC.** A. Our approach builds a series of biologically relevant prediction models to provide both high resolution and readily human-understandable representations of ccRCC slide images. The first two models identify tumor tissue and grade phenotype within predicted tumor regions, each using a finetuned ResNet-50 convolutional neural network (CNN). A third model identifies tumor infiltrating lymphocytes (TILs) using a finetuned HoVerNet CNN. Local predictions are grouped via watershed segmentation and assembled into graph representations for slide-level description of patients. Computationally inferred patient representations capture both clinically relevant, and biologically informative characteristics of ccRCC. B. Comparison of assigned pathologist grade and grade score on held-out cohorts (TCGA-KIRC, CM-025) in-house training set used for tumor and grade classifier development (DFCI-PROFILE). C. Kaplan-Meier curves for progression free interval (PFI) in TCGA-KIRC based on tercile bins of computationally inferred continuous grade score (left) and assigned pathologist grade (right).



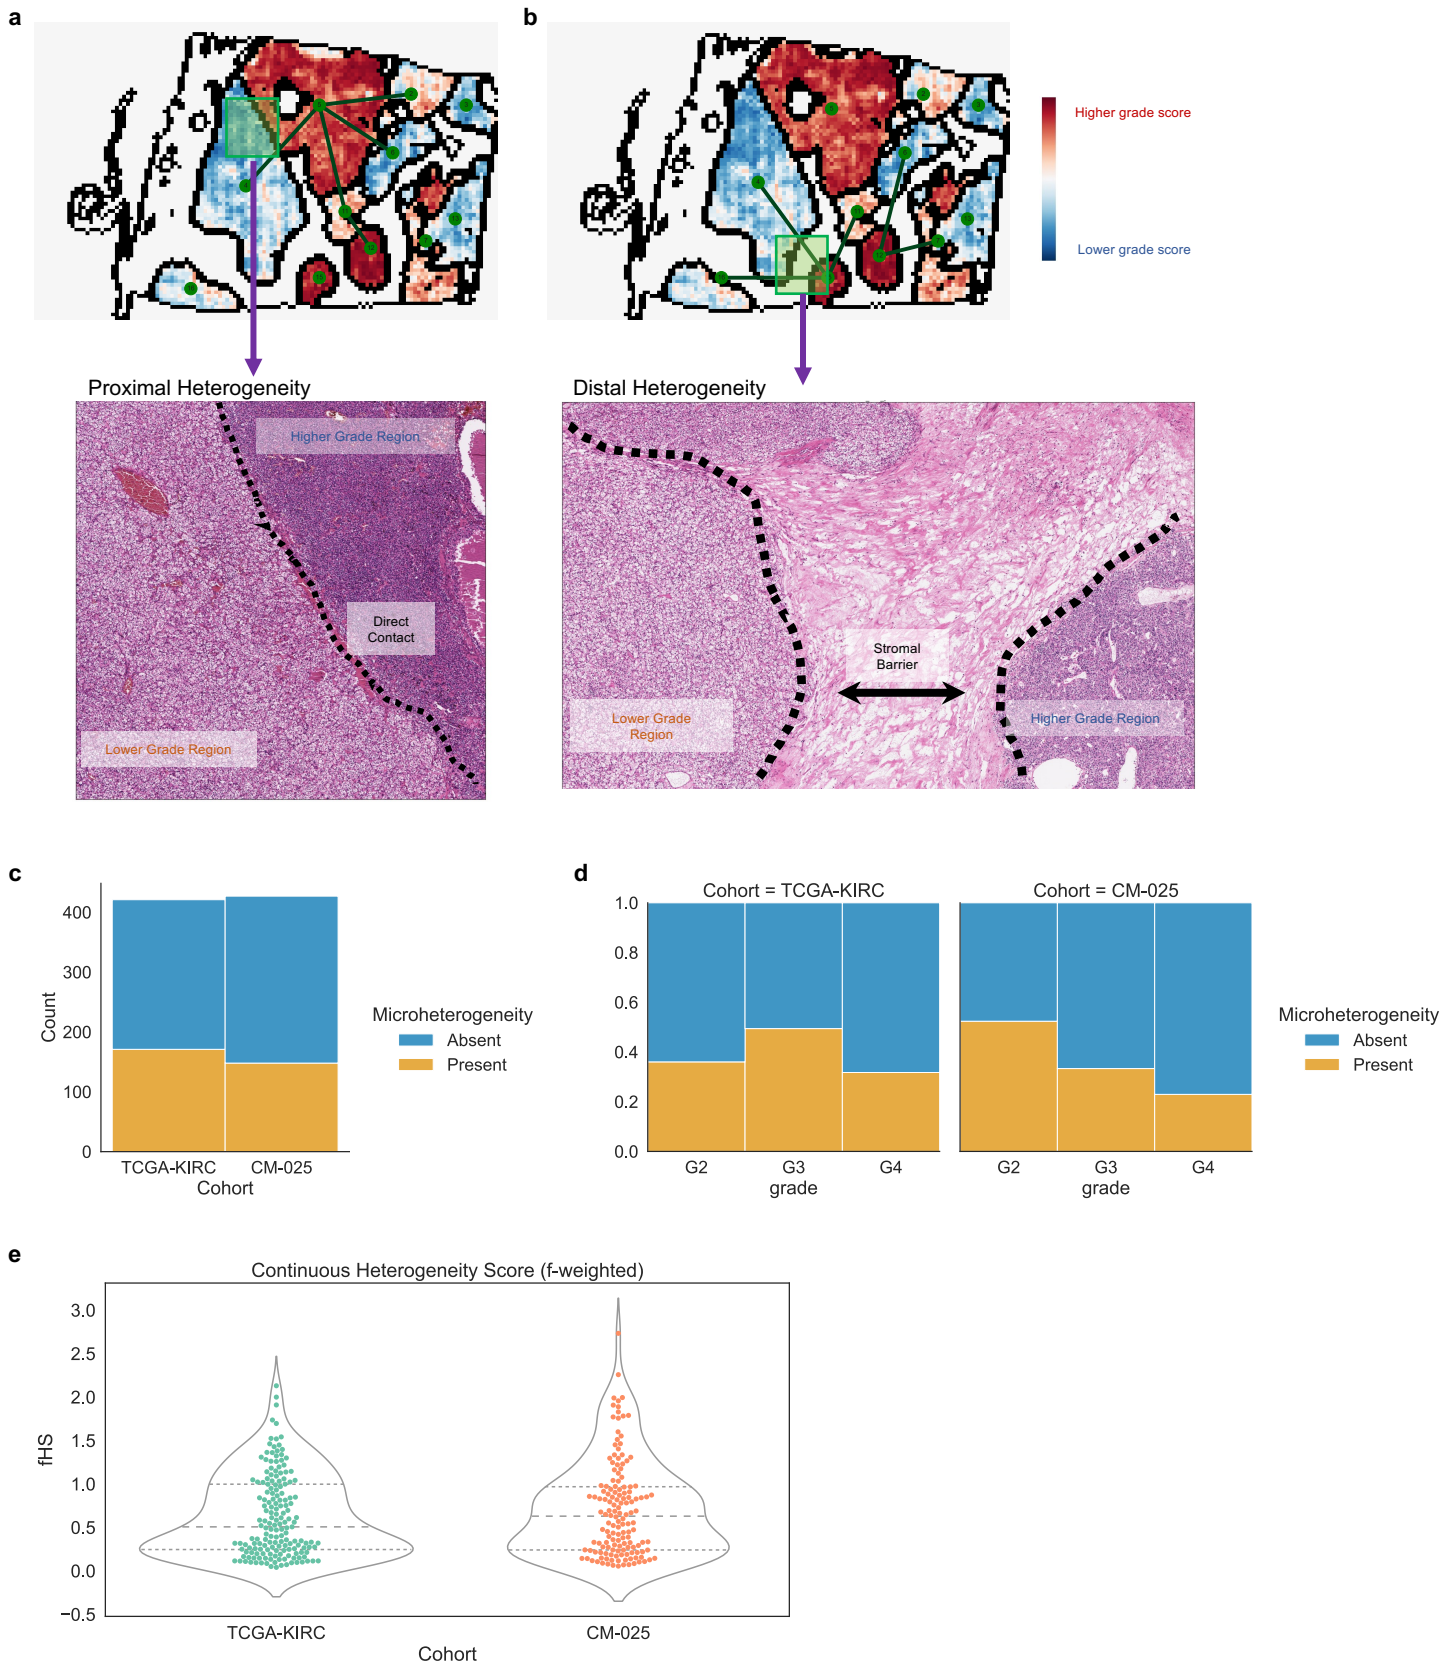

**Figure 2: Computationally inferred phenotypic variation in ccRCC.** A. Representative example of proximally occurring grade microheterogeneity (dashed line indicating interface of region contact). B. Representative example of distally occurring grade microheterogeneity. C-E: Summary statistics surrounding microheterogeneity in the TCGA-KIRC and CM-025 cohorts. C: Number of patients with/without microheterogeneity. D: Frequency of microheterogeneity by assigned pathologist grade (where available). E: Distribution of continuous heterogeneity score (f-weighted) in non-homogeneous cases, which describes the extent of microheterogeneity in a given slide.

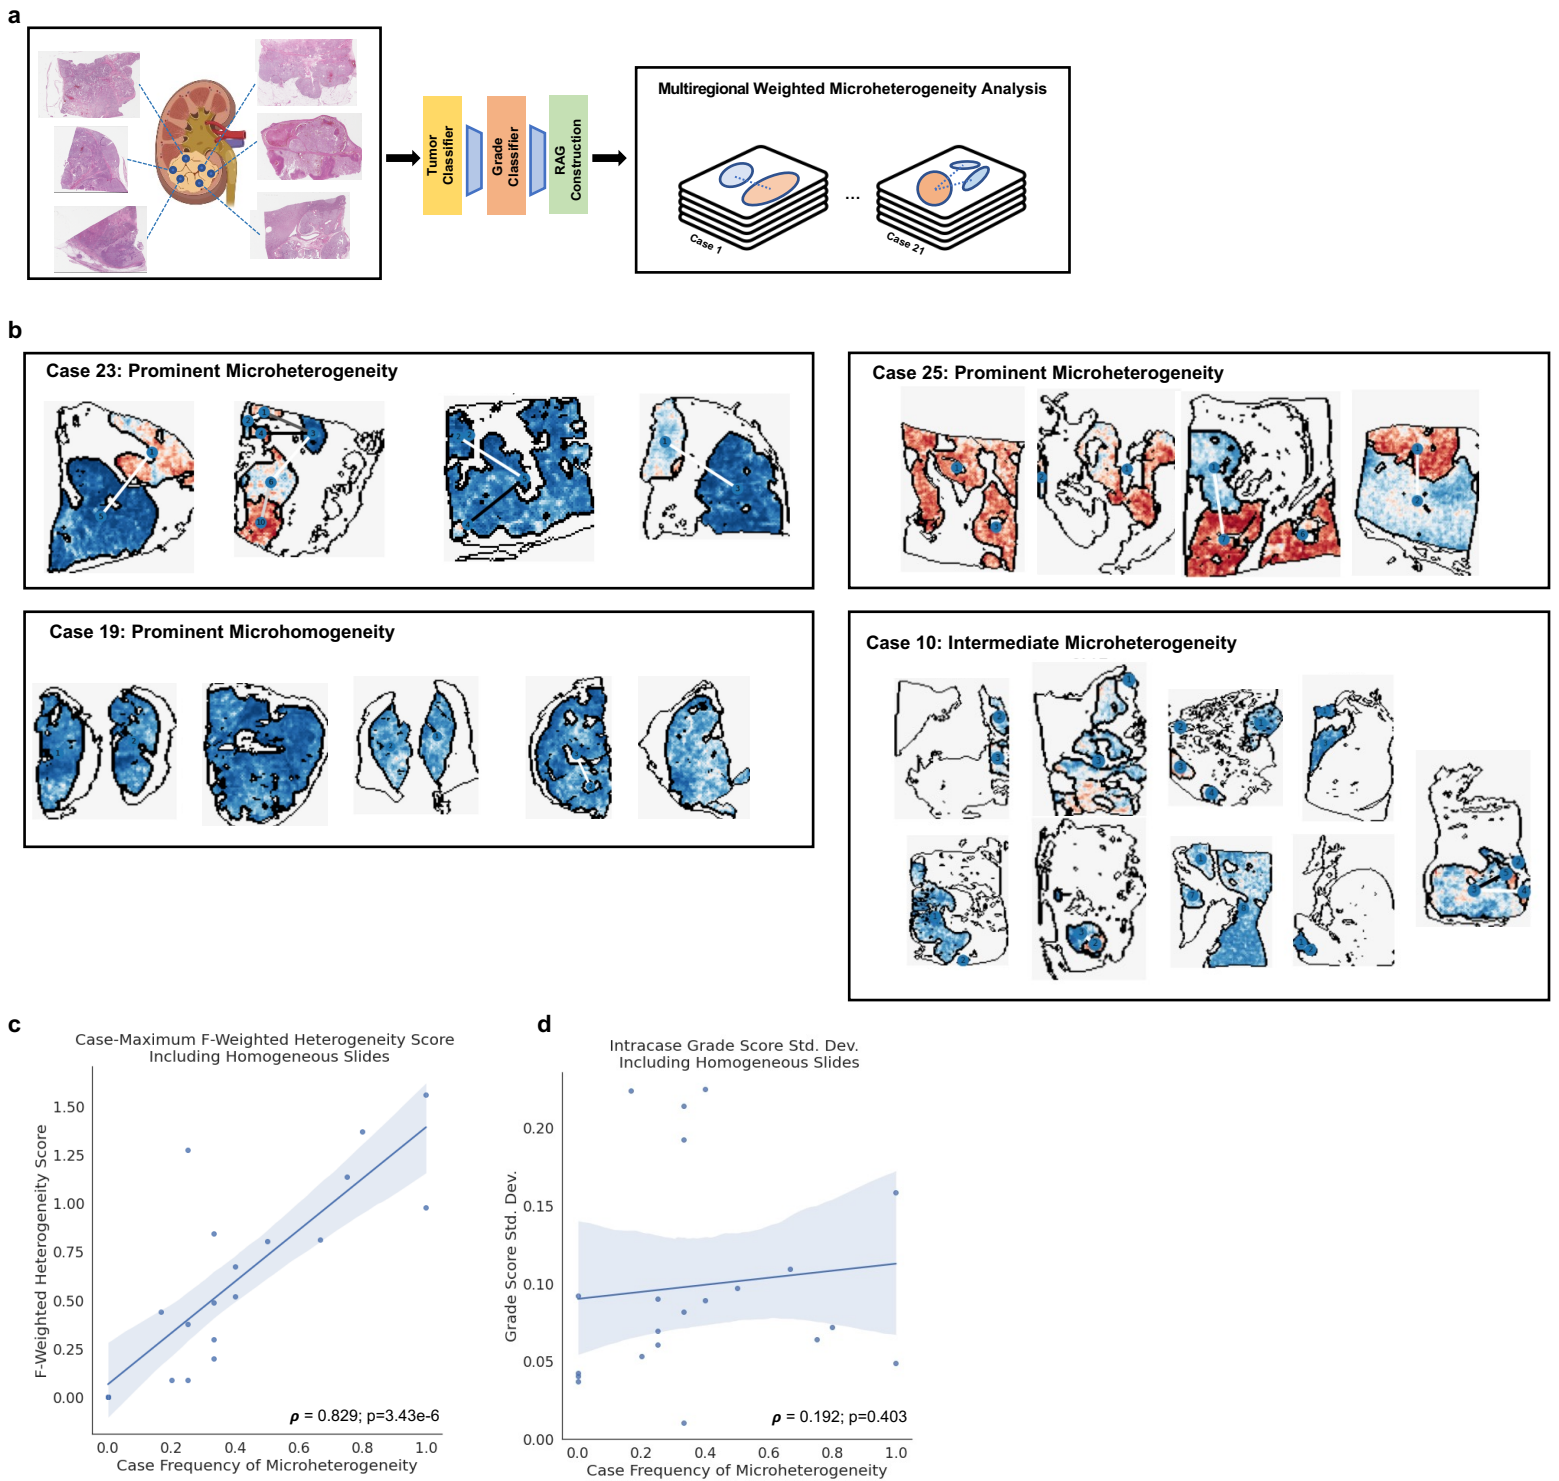

**Figure 3: Linkage between microheterogeneity and whole-tumor variation.** A. Schematic for creating a multiregional weighted microheterogeneity analysis using computer vision models. B. Example data collections from four patients, showing RAG plots for the scanned slide of each tissue block. C. Case-wise frequency of microheterogeneity versus the maximum observed f-weighted heterogeneity score, which describes the largest extent of heterogeneity observed in a patient. Statistics aggregated within a given patient's set of scanned tissue blocks (1 slide per block). D. Case-wise frequency of microheterogeneity versus standard deviation of grade score predictions within the same case. Statistics aggregated within a given patient's set of scanned tissue blocks (1 slide per block). Pearson's Rho  $\rho$ -values calculated via exact distribution.

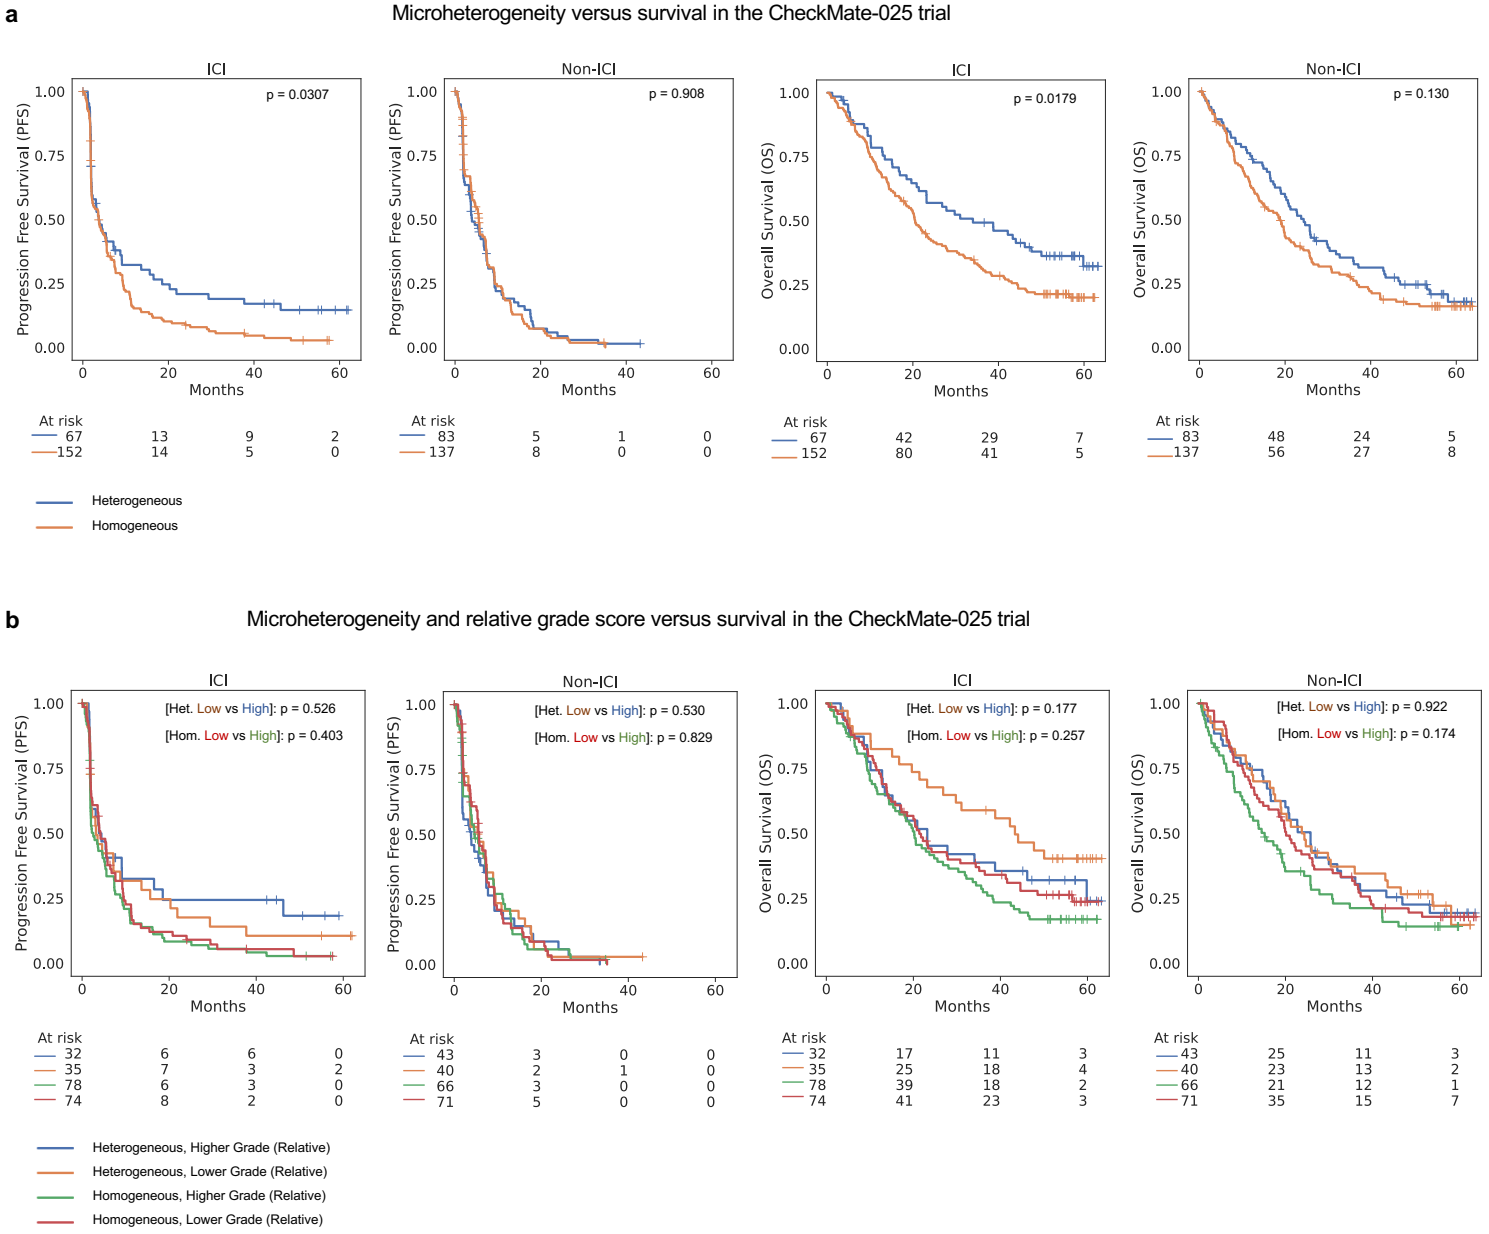

**Figure 4: Inferred patterns of grade microheterogeneity associate with improved survival in the CheckMate-025 (CM-025) cohort, but only for immune checkpoint inhibitor (ICI) treated patients. A.** Kaplan-Meier curves for overall survival (OS) and progression free survival (PFS) in the CM-025 cohort based on the presence of microheterogeneity. Significance values were calculated via log-rank test. **B.** Kaplan-Meier curves for overall survival (OS) and progression free survival (PFS) in the CM-025 cohort based on the presence of microheterogeneity, stratifying further based on relative grade score within a grade microheterogeneity category. Significance values were calculated via (pairwise) log-rank test.

a

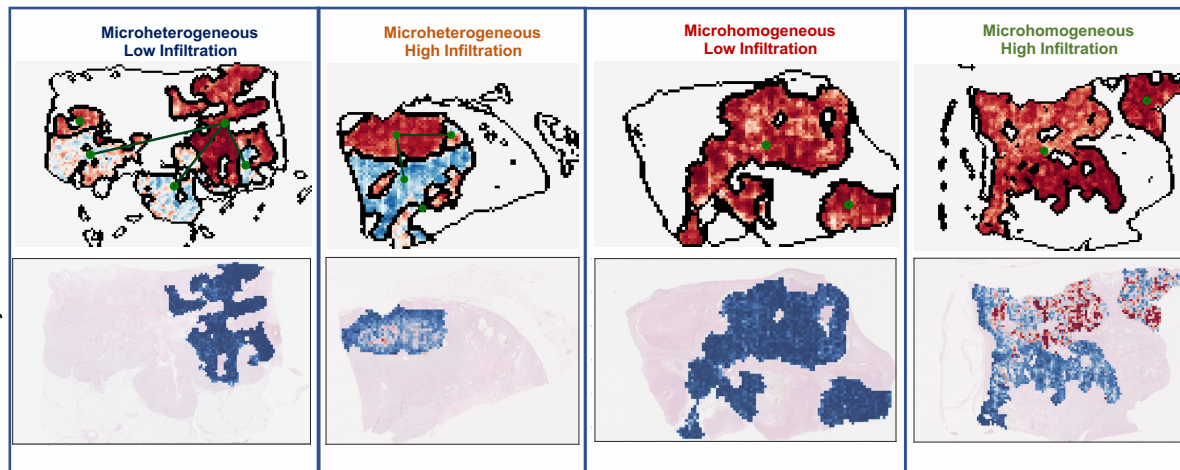

b

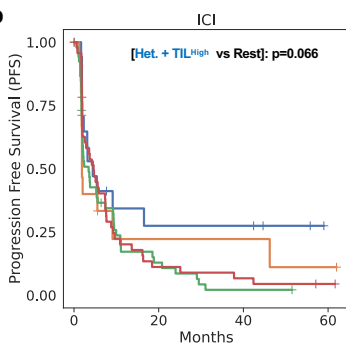

| At risk |   |   |   |  |
|---------|---|---|---|--|
| 17      | 4 | 4 | 0 |  |
| 15      | 2 | 2 | 1 |  |
| 55      | 6 | 1 | 0 |  |
| 48      | 5 | 3 | 1 |  |

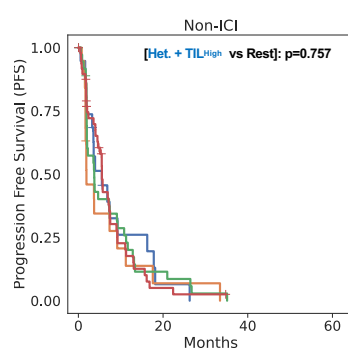

| At risk |   |   |   |  |
|---------|---|---|---|--|
| 21      | 1 | 0 | 0 |  |
| 19      | 1 | 0 | 0 |  |
| 39      | 4 | 0 | 0 |  |
| 49      | 2 | 0 | 0 |  |

c

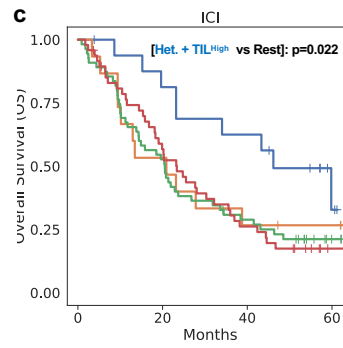

| At risk |    |    |   |  |
|---------|----|----|---|--|
| 17      | 13 | 10 | 2 |  |
| 15      | 8  | 4  | 3 |  |
| 55      | 29 | 15 | 2 |  |
| 48      | 26 | 12 | 1 |  |

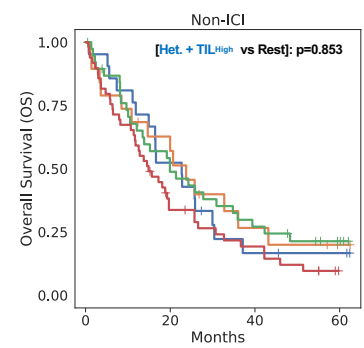

| At risk |    |    |   |  |
|---------|----|----|---|--|
| 21      | 11 | 3  | 2 |  |
| 19      | 10 | 4  | 1 |  |
| 39      | 18 | 10 | 4 |  |
| 49      | 15 | 8  | 0 |  |

— Heterogeneous, High Infiltration  
— Heterogeneous, Low Infiltration  
— Homogeneous, High Infiltration  
— Homogeneous, Low Infiltration

Figure 5: **Combining computationally inferred tumor and immune states identifies a further subset of responders to immune checkpoint inhibition (ICI) in the CheckMate-025 trial.** A. Representative examples of four classes of patients identified using computational inference, based on the presence of grade microheterogeneity, and the relative abundance of tumor infiltrating lymphocytes in high-grade tumor regions (TIL Density). Top row: representative RAG plots based on grade score (Blue: lower score, Red: higher score). Bottom row: Representative inferred TIL densities (blue: lower infiltration, red: Higher infiltration; uncolored: lower grade regions not considered for TIL density evaluation). B-C: Kaplan-Meier curves for progression free survival (PFS) and overall survival (OS) in both arms of the CM-025 trial based on the groups demonstrated in (a). Significance values were calculated via log-rank test between “Microheterogeneous and High Infiltration” patients and all remaining patients within a trial arm.

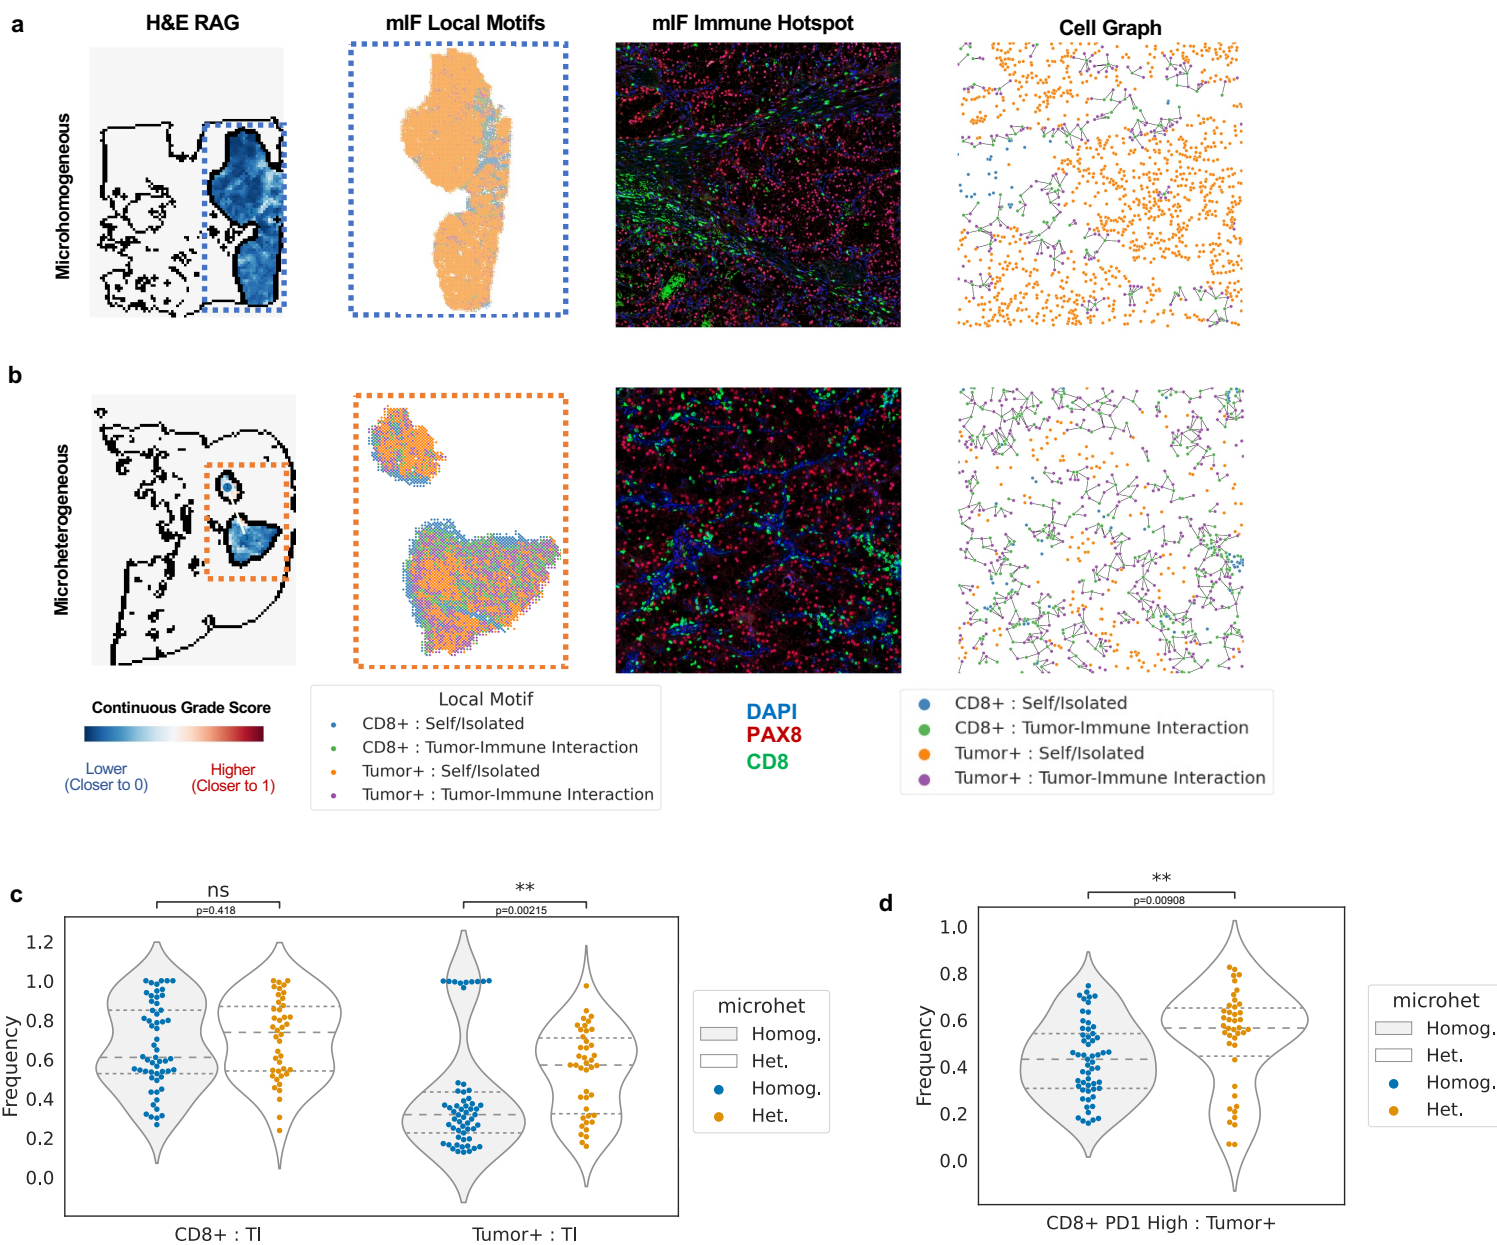

**Figure 6: Exploration of microheterogeneity implications in paired multiplexed imaging data.** A,B. Representative example of a Microhomogeneous case (A), and Microheterogeneous case (B). H&E Rag: slide-level representation of H&E-inferred tumor and grade properties. mIF Local Motifs: indicates the primary cell type and context present within overlapping 200 pixel windows. mIF Immune Hotspot: representative example of an area of high tumor-immune interaction density. Cell Graph: visualization of tumor and CD8+ cells, and their interaction context; edges are drawn between interacting tumor and CD8+ cells (nearest neighbors in a Delaunay triangulation). C. Comparison of the frequency of tumor-immune interaction within CD8+ cells (left) and tumor cells (right) versus H&E-inferred microheterogeneity status. (TI: “tumor-immune” interaction context). D. Comparison of the frequency of PD1-High within CD8+ cells that interact with tumor cells versus H&E-inferred microheterogeneity status. Significance calculated via Wilcoxon rank sum test.

p-value annotation legend:

ns:  $p \leq 1.00e+00$   
 \*:  $1.00e-02 < p \leq 5.00e-02$   
 \*\*:  $1.00e-03 < p \leq 1.00e-02$   
 \*\*\*:  $1.00e-04 < p \leq 1.00e-03$   
 \*\*\*\*:  $p \leq 1.00e-04$

# **Extended Data**

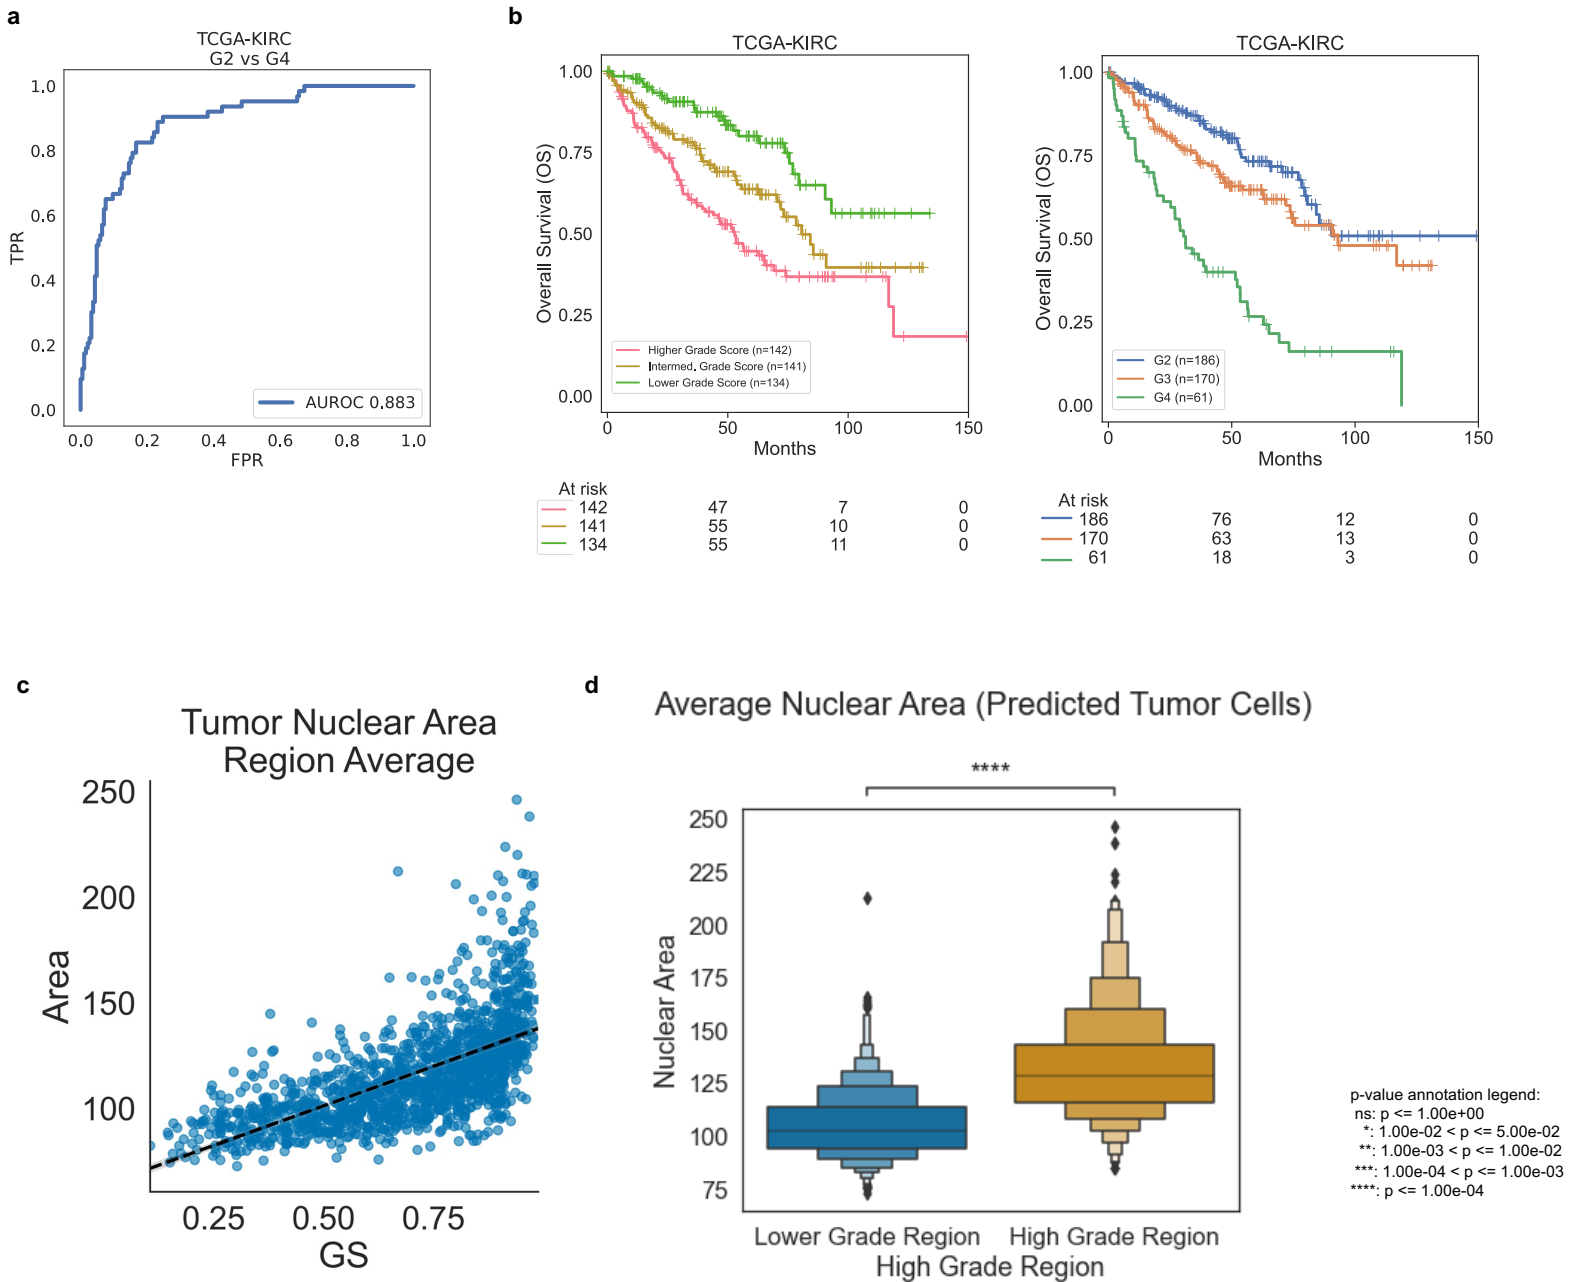

**Extended Data Figure 1: Evaluation of grade neural network model.** A. Receiver operator characteristic curve (ROC) for evaluating performance of a grade classifier on TCGA-KIRC (*AUROC*: area under ROC curve statistic; *TPR*: true positive rate; *FPR*: false positive rate). B Kaplan-Meier curves for overall survival (OS) in TCGA-KIRC based on tertile bins of computationally inferred continuous grade score (left) and assigned pathologist grade (right). C. The average area of predicted tumor nuclei versus grade score (GS), aggregated over distinct tumor regions per WSI. D. Dichotomizing regions based on high grade designation (average score above 0.8).

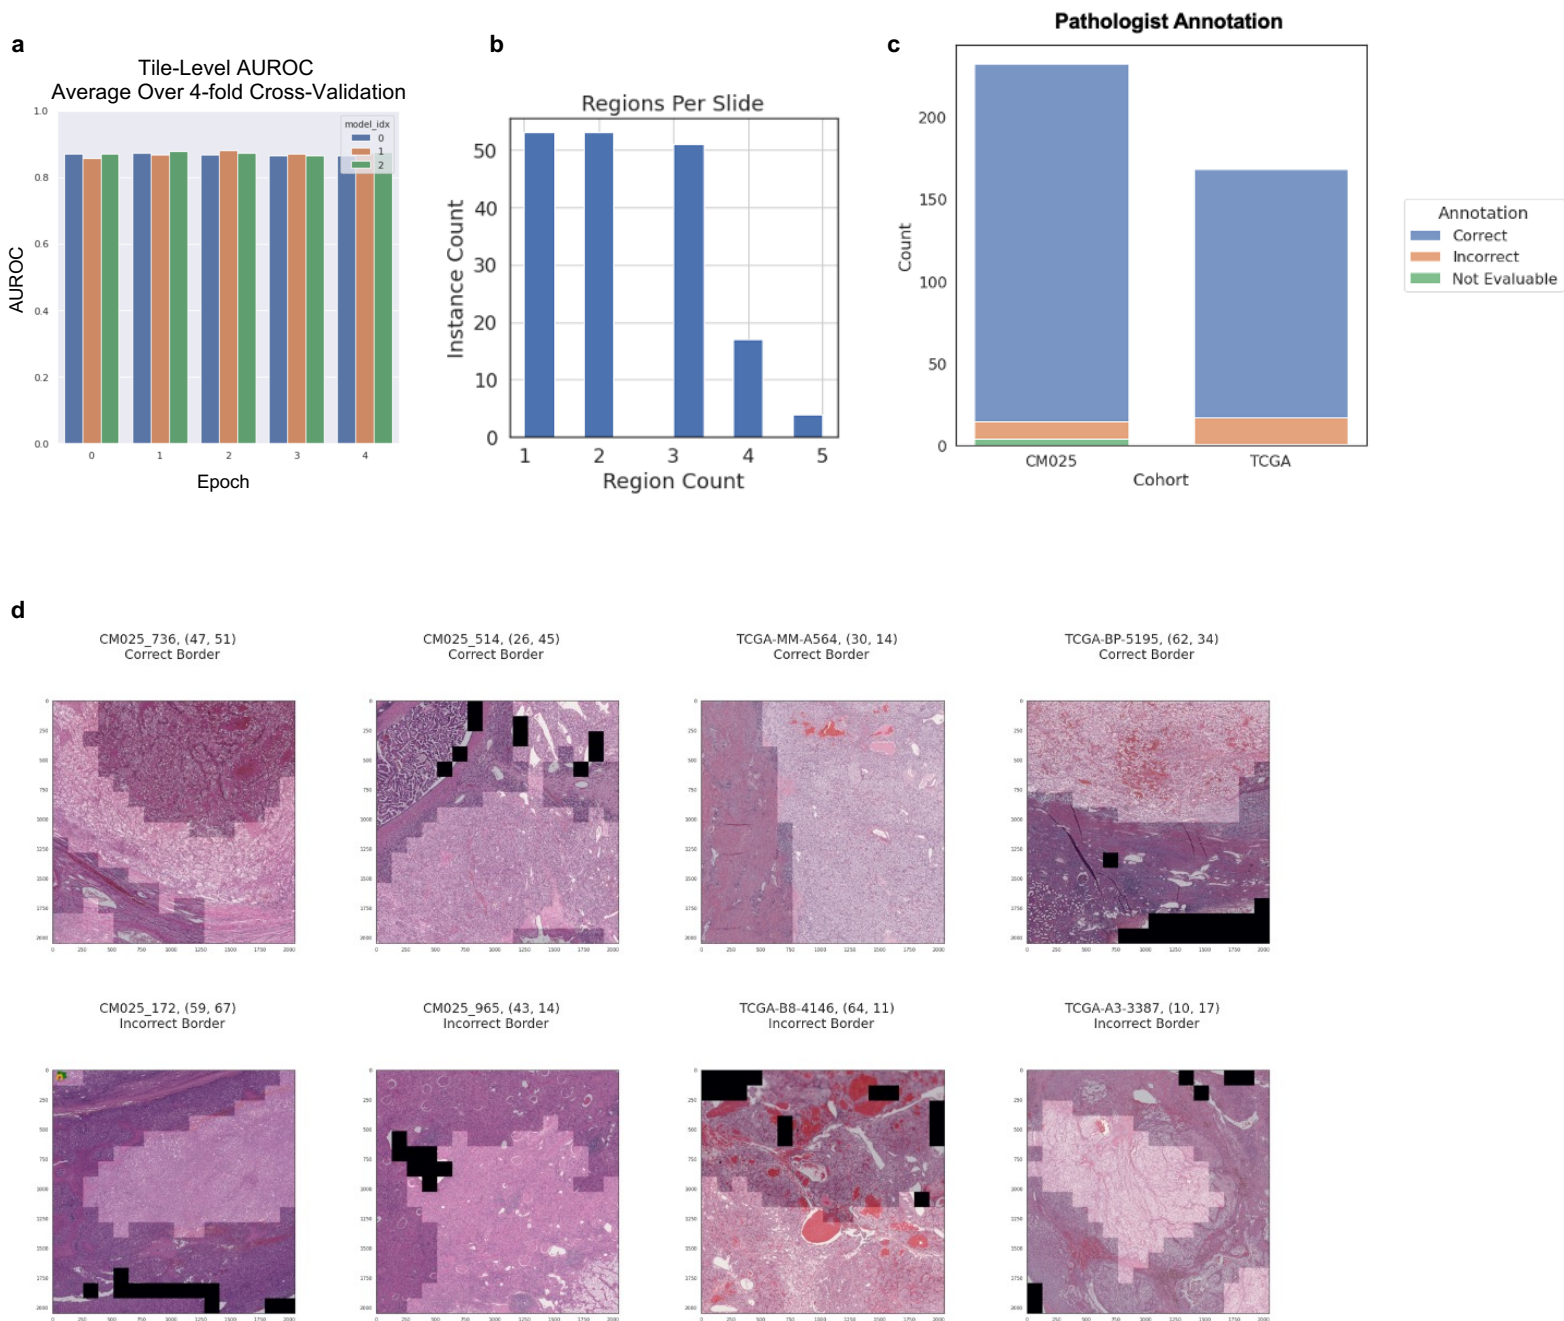

**Extended Data Fig. 2: Evaluation of tumor region segmentations by pathologist.** A. Tile-level AUROC for tumor vs non-tumor prediction, averaged over 4-fold cross-validation. (Model 0: Finetuned ResNet-18, Model 1: Finetuned ResNet-50 (Selected for downstream), Model 2: Modified ResNet-50.) B. Number of regions examined per sampled slide. C. Distribution of pathologist assessments by cohort. D. Examples of correct and incorrect tumor-stroma borders.



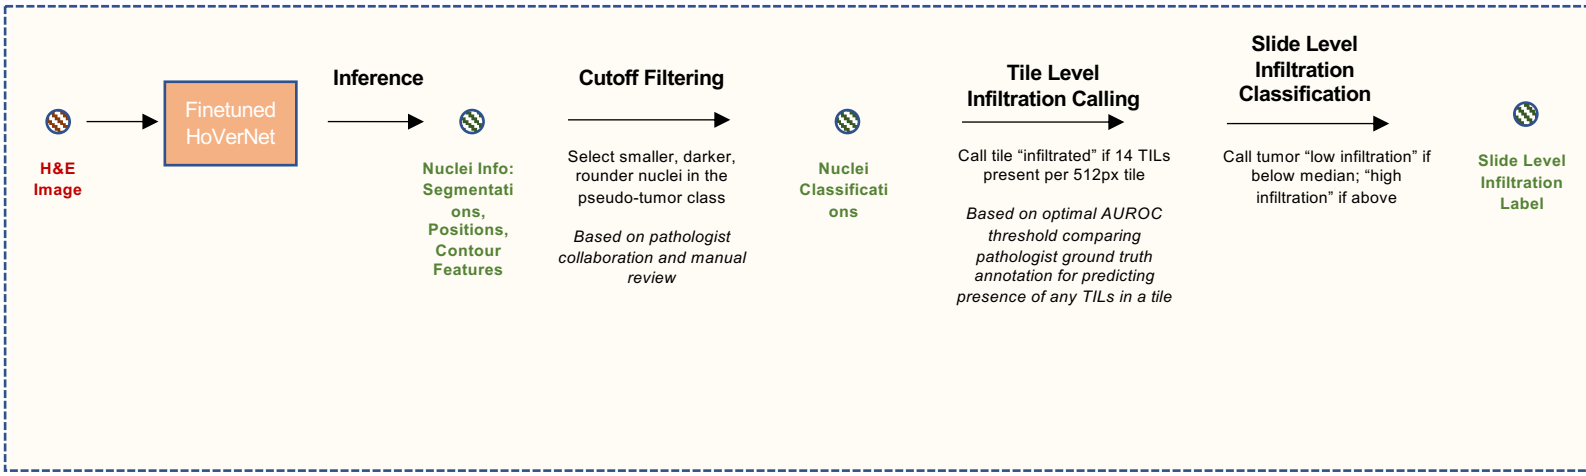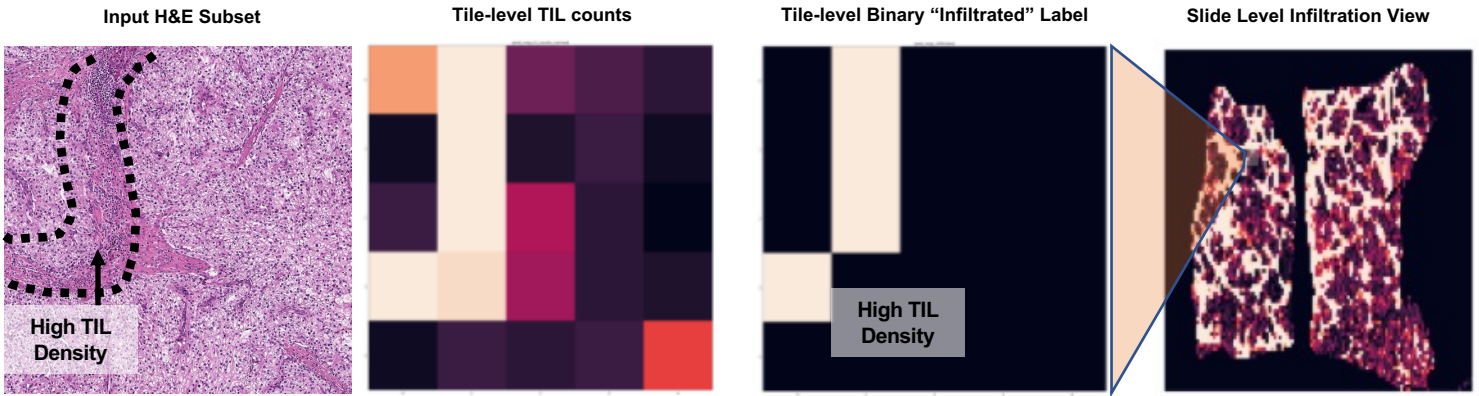

**Extended Data Figure 3: TIL inference process description.** Top: sequential descriptions of inference process. Bottom: visual example for illustration.

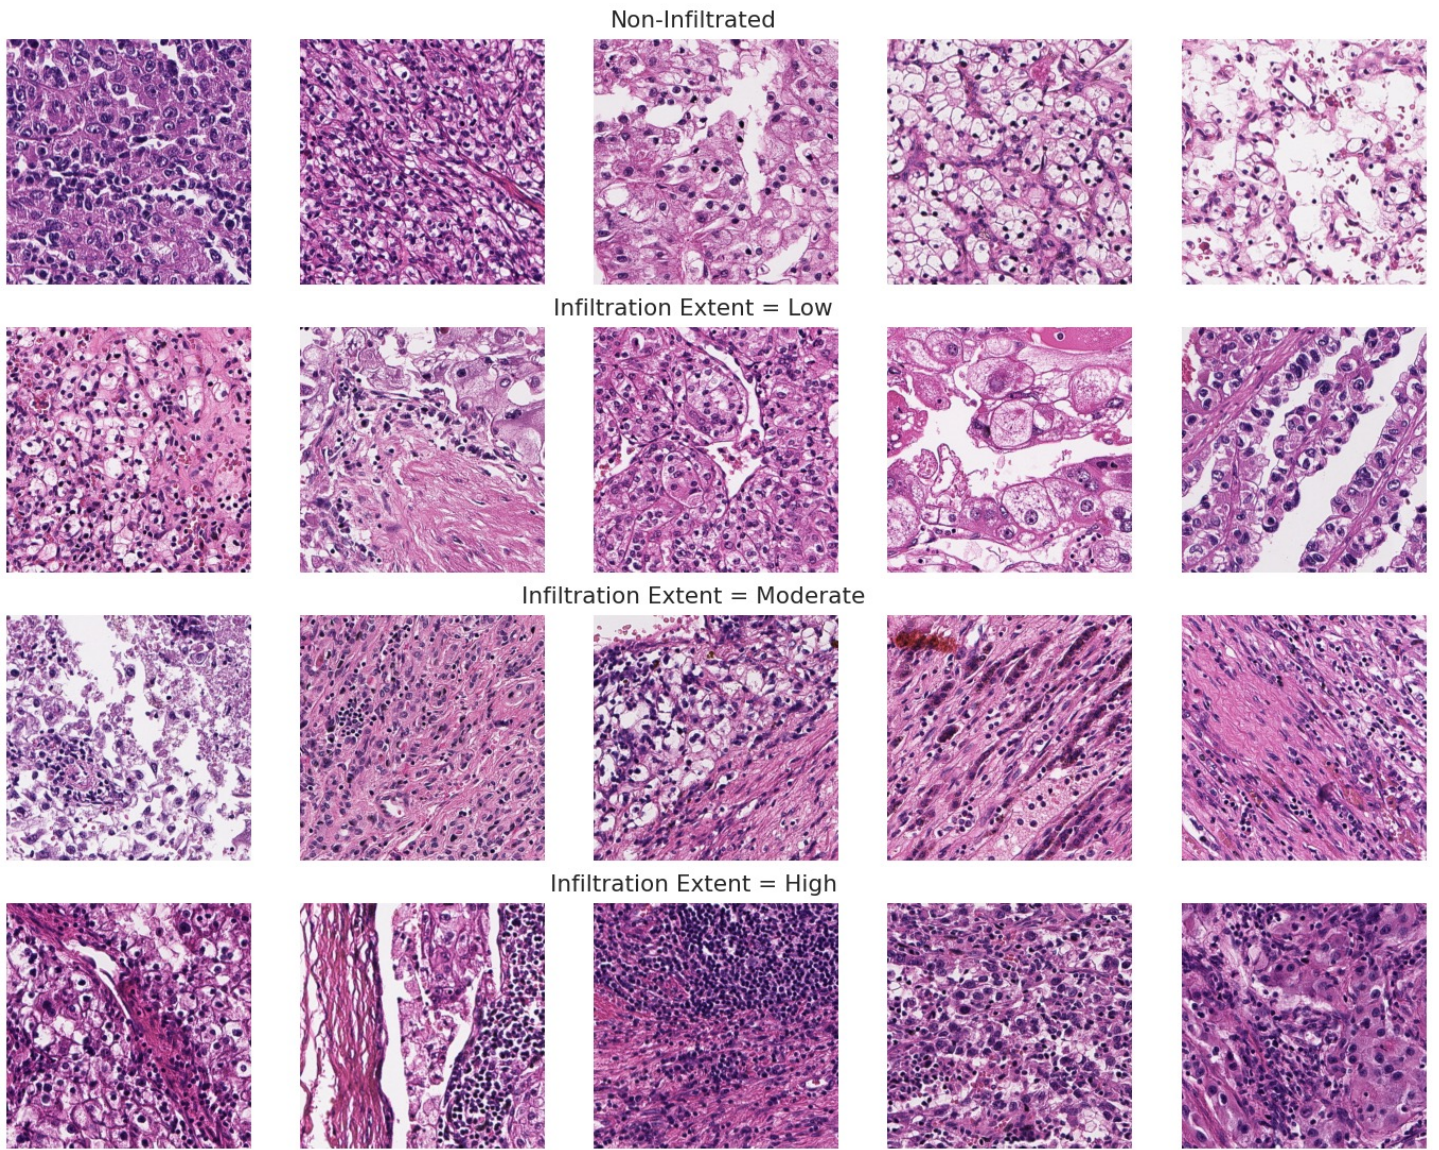

**Extended Data Figure 4: Ground truth/pathologist-labeled examples for TIL infiltration extent used for evaluating tile level TIL thresholds.**

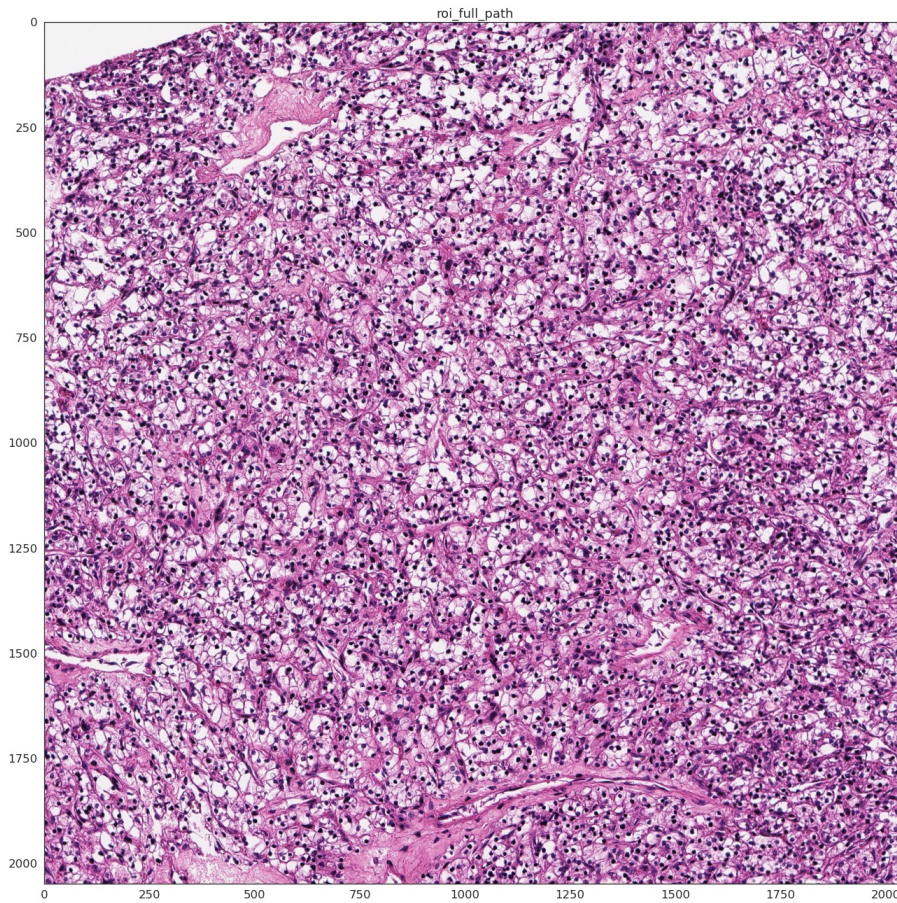

Example of lower grade tissue incorrectly called as highly infiltrated

**Extended Data Fig. 5: Lower grade tumor tissue is prone to extreme false positive rates, wherein tumor nuclei are classified as TILs incorrectly.**

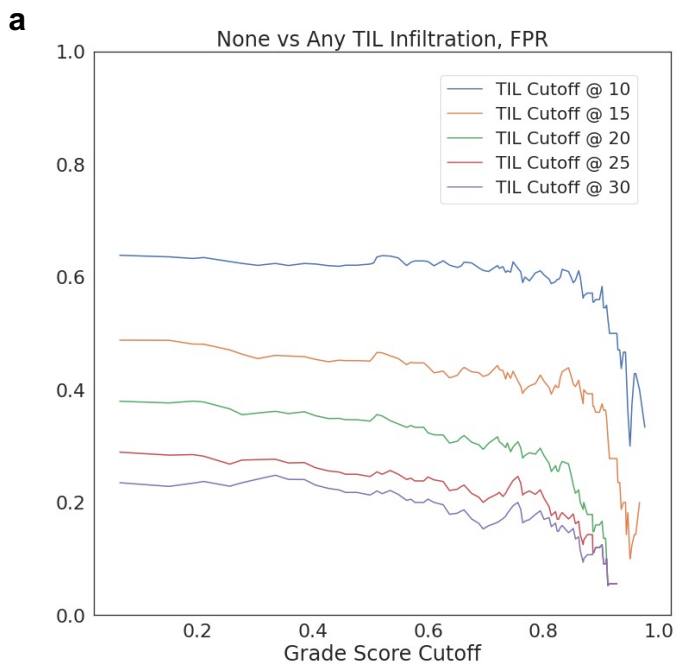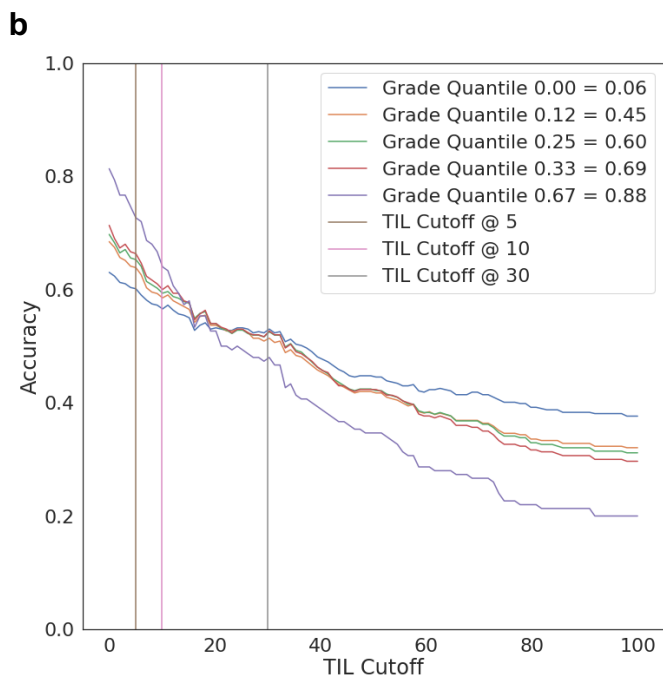

**c**

M-W Comparison of Grade Score Distributions  
 Correct vs Incorrect Predictions  
 None vs Any

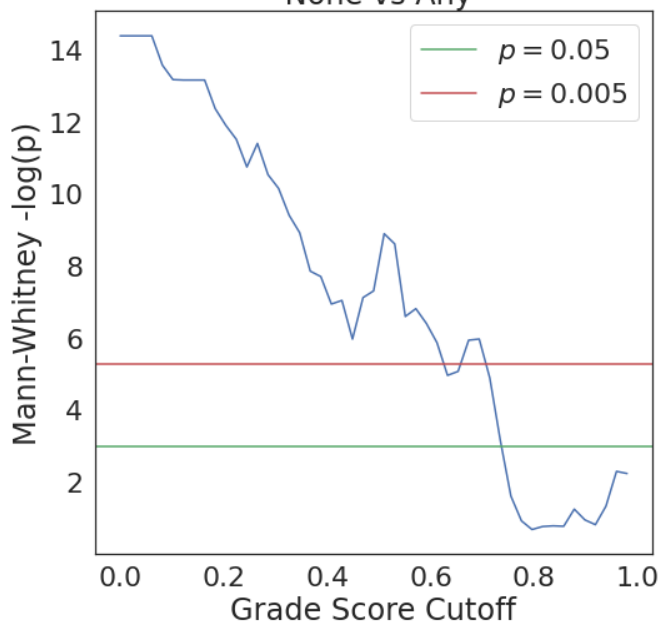

**Extended Data Fig. 6: Accuracy in predicting TIL infiltration presence relies on both grade score and infiltration cutoff choice. A/B.** False positive rate (FPR) and accuracy, respectively, versus minimum tissue segment grade score required for TIL evaluation at different cutoffs for calling “infiltrated”. **C.** Mann-Whitney U test statistic p-values from comparing grade score distributions of correctly versus incorrectly classified tiles (“none” vs “any” TIL presence) at different minimum grade score cutoffs.

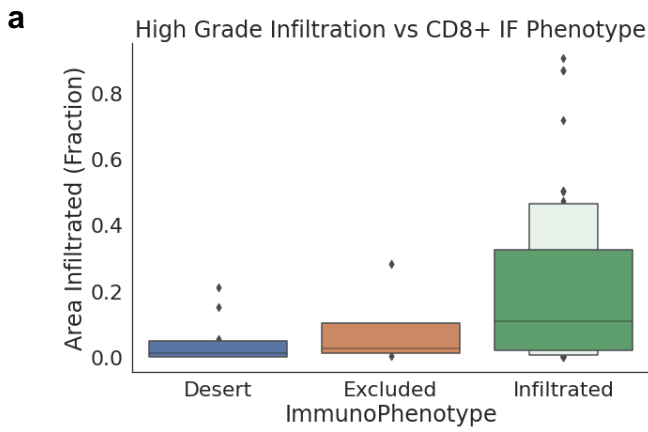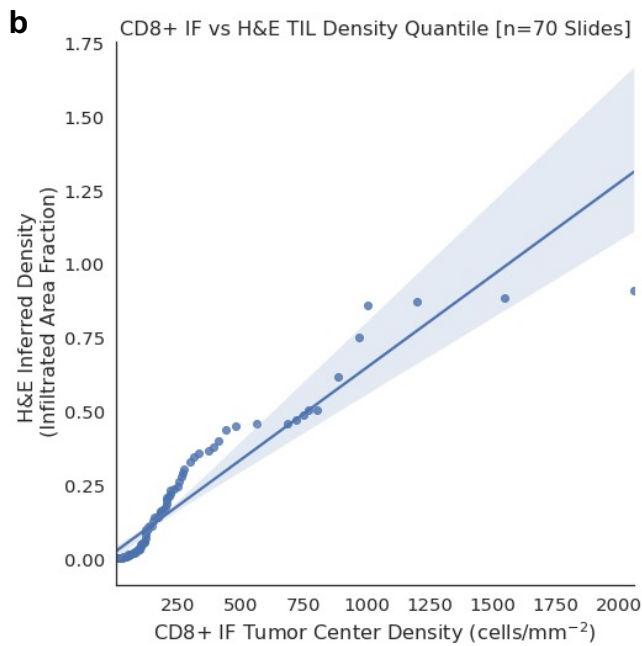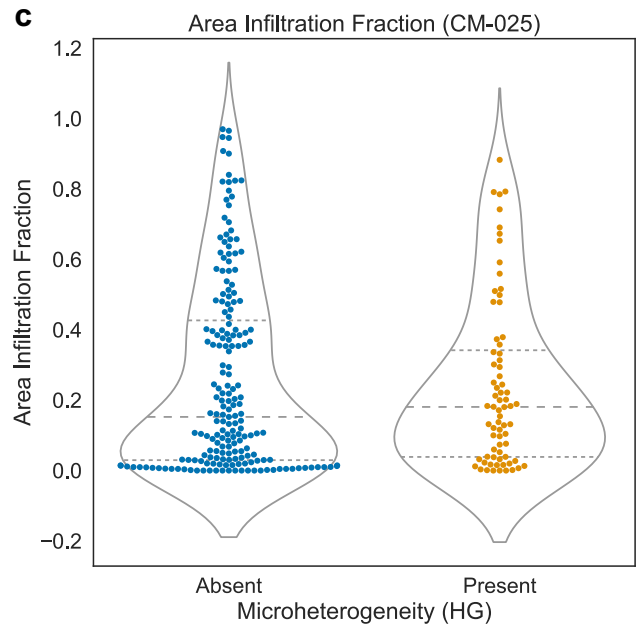

**Extended Data Fig. 7: Comparing H&E derived TIL phenotypes to CD8+ data from the same tumor. A.** Inferred tumor infiltrating lymphocyte density in high grade foci is consistent with CD8+ immunofluorescence data collected for a subset in the same cohort (Braun et al., 2020). **B.** QQ-plot comparison of CD8+ IF tumor center cell density versus H&E-inferred TIL infiltrated area fraction. **C.** Area infiltration fraction in CM-025 versus microheterogeneity status (within edges containing a high grade node [score  $\geq 0.8$ ]). Area infiltration fraction: proportion of tiles above the “infiltrated” cutoff (14 TIL/tile).

**a**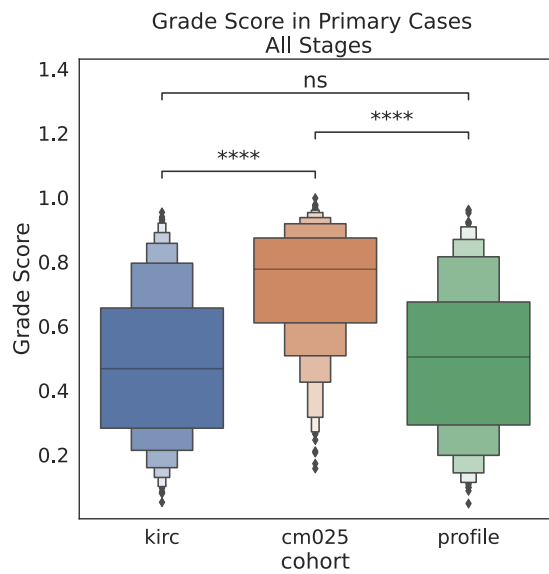**b**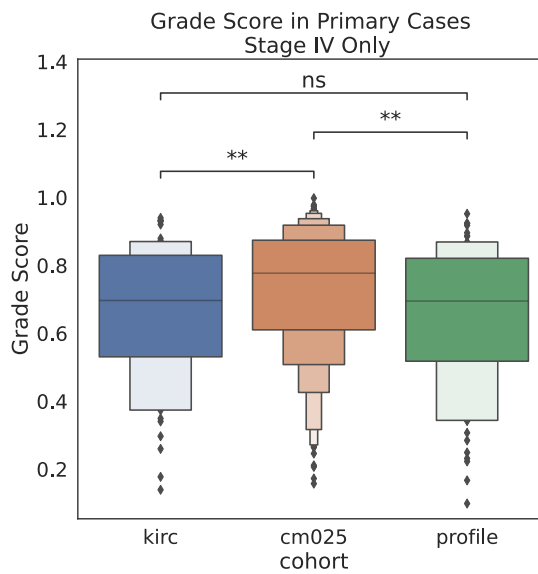

**Extended Data Fig. 8: Cohort level distributional differences in grade score. A.** Grade score distributions for each cohort. **B.** Grade score distributions in each cohort, limited to Stage IV cases.

p-value annotation legend:

ns:  $p \leq 1.00e+00$

\*:  $1.00e-02 < p \leq 5.00e-02$

\*\* :  $1.00e-03 < p \leq 1.00e-02$

\*\*\*:  $1.00e-04 < p \leq 1.00e-03$

\*\*\*\*:  $p \leq 1.00e-04$

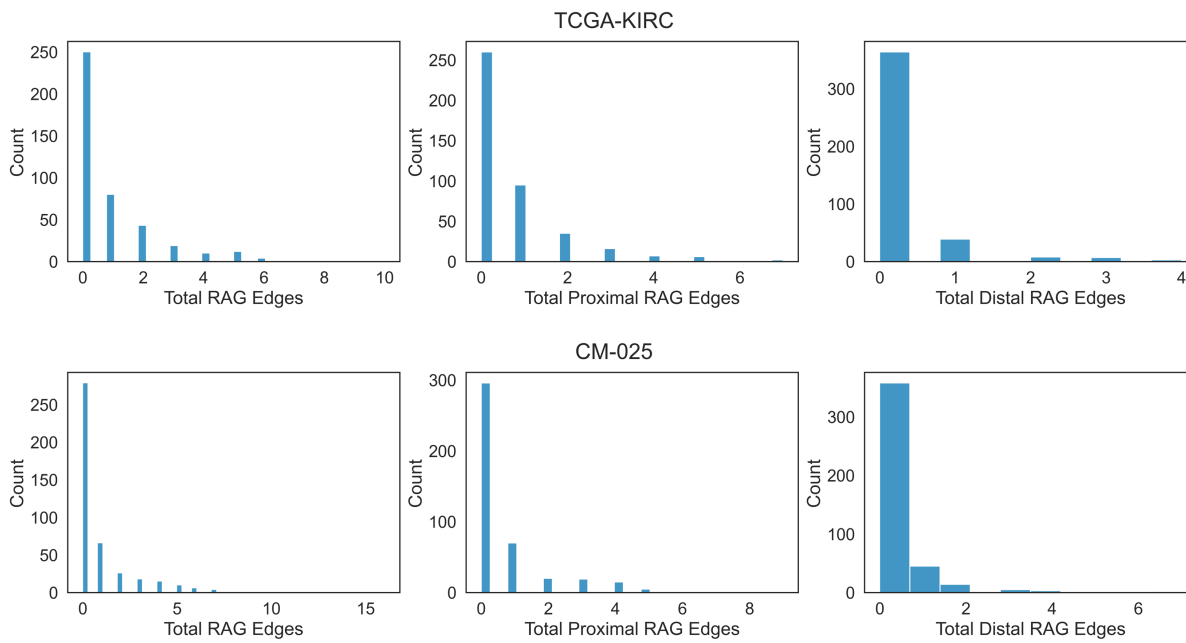

**Extended Data Figure 9: Distribution of RAG edges across TCGA-KIRC and CM-025.** Histograms of RAG edge counts, split by type.

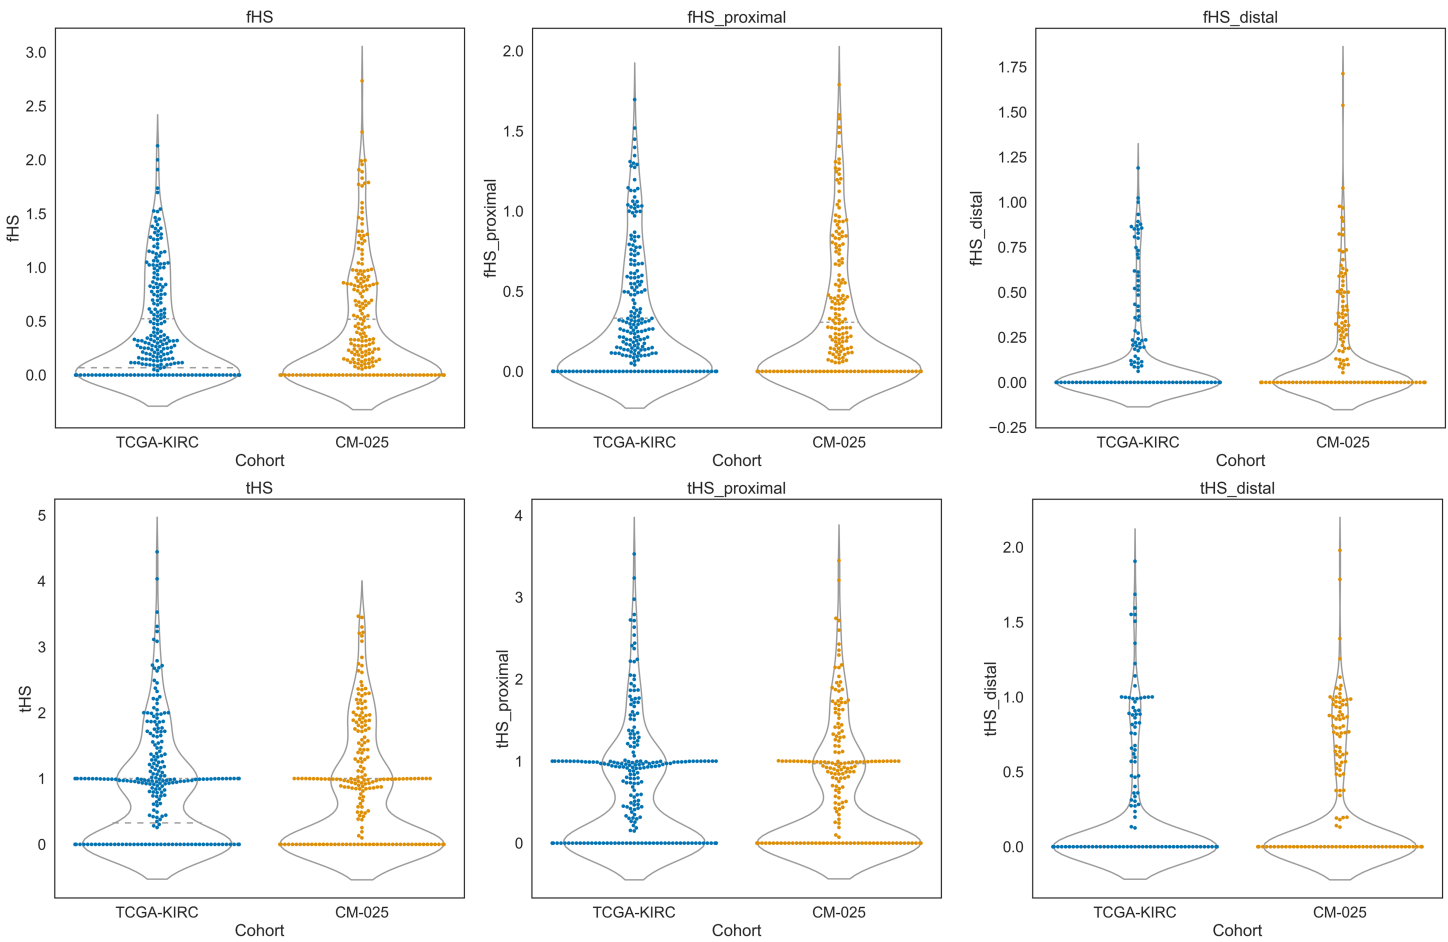

**Extended Data Figure 10: Distribution of continuous heterogeneity scores across TCGA-KIRC and CM-025.** Violin-Swarm plots for f-weighted heterogeneity scores (f-HS). Left column: combined (summed) proximal and distal counts/scores. Middle: proximal context ("proximal"). Right: Distal context ("distal").

**a**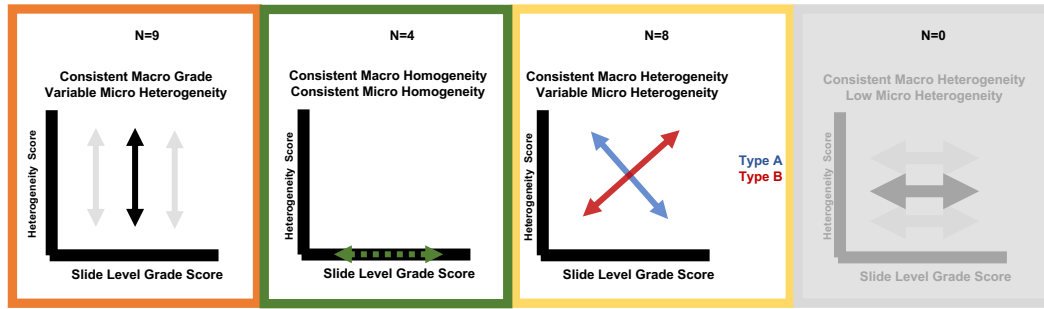**b**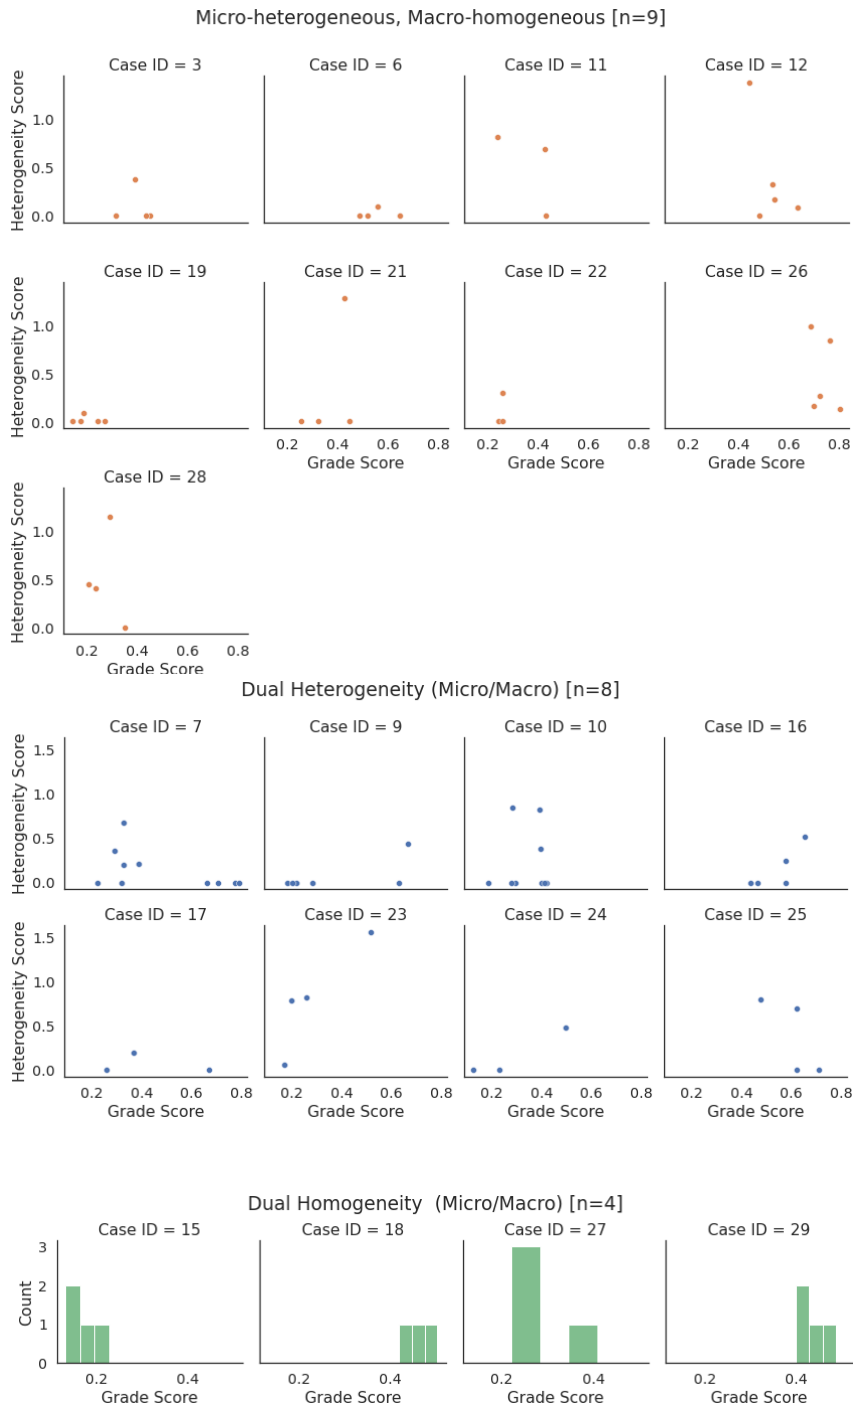

**Extended Data Figure 11: Multiregional microheterogeneity dataset description.** A. schematic of proposed covariation patterns of microheterogeneity score and grade score within the samples collected from a single patient tumor. B. Actual data analyzed.



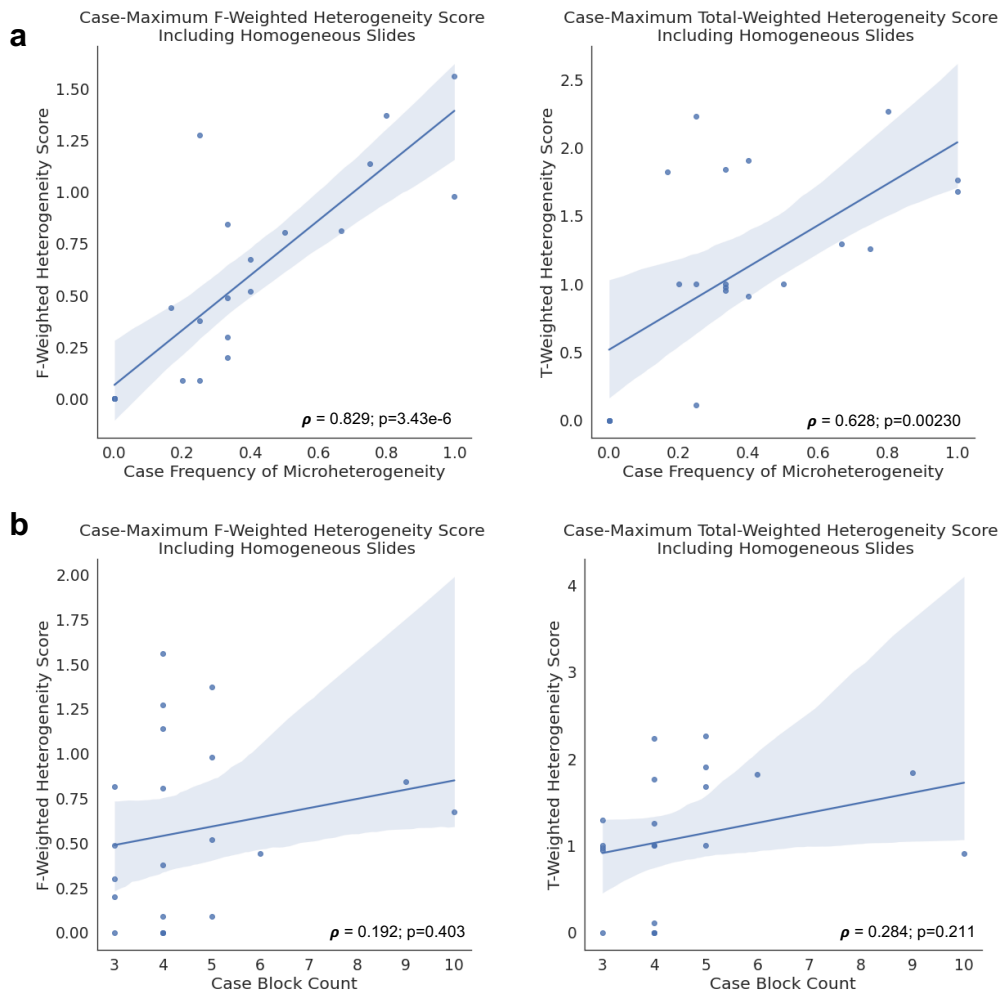

**Extended Data Figure 12: Aggregate continuous heterogeneity scores.** A. Case-wise frequency of microheterogeneity versus the maximum observed f-weighted or total-weighted heterogeneity score. B. Case-wise block count versus the maximum observed f-weighted or total-weighted heterogeneity score. Statistics aggregated within a given patient's set of scanned tissue blocks (1 slide per block). Pearson's Rho p-values calculated via exact distribution.

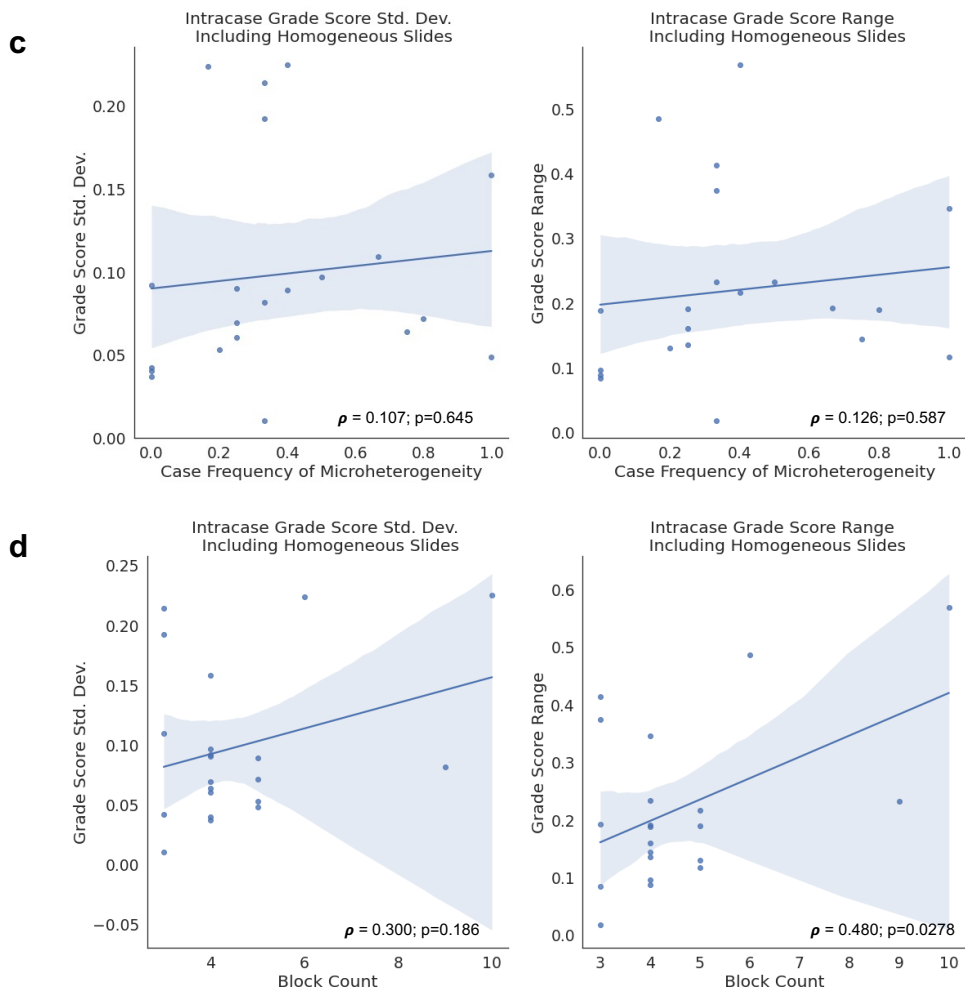

**Extended Data Figure 12 (continued): Aggregate grade score descriptions.** C. Case-wise frequency of microheterogeneity versus the intracase grade score standard deviation or range. D. Case-wise block count versus intracase grade score standard deviation or range. Statistics aggregated within a given patient's set of scanned tissue blocks (1 slide per block). Pearson's Rho  $\rho$ -values calculated via exact distribution.

**a**  $-\log_{10}(\text{Log-likelihood Ratio Test p-value})$  vs Slide Selection Strategy

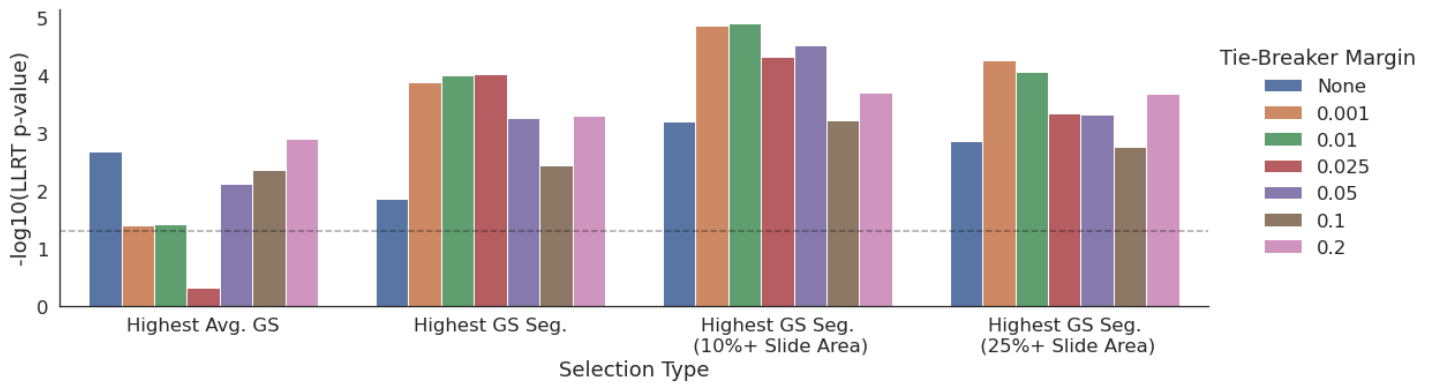

**b**

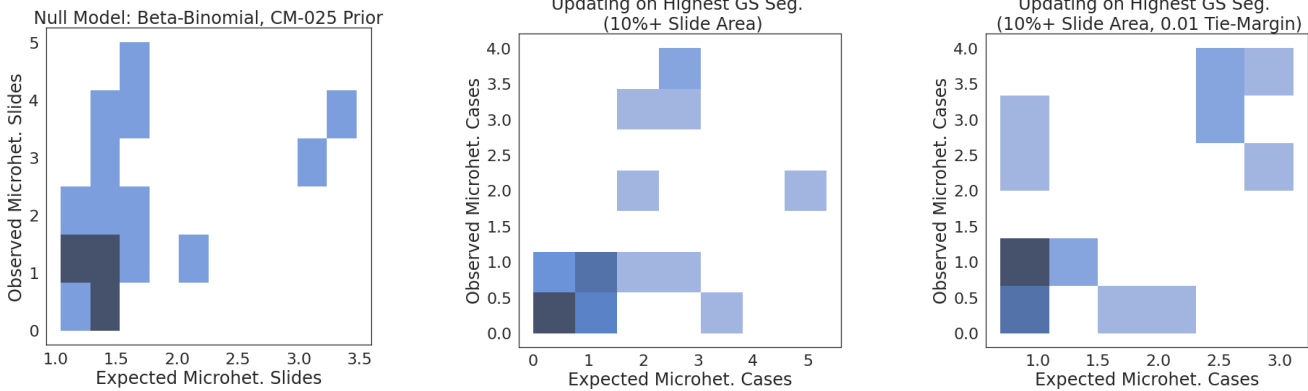

**Extended Data Figure 13: Modeling microheterogeneity occurrence.** A. Negative log<sub>10</sub> p-values for a likelihood ratio test comparing a null model (beta binomial) to a model that updates its parameters upon observing one “reference” slide from a patient’s collection of samples. X-axis: different selection strategies. Tie-Breaker Margin: margin to allow for considering two or more samples as equally weighted references. GS: Grade Score. B. visualization of expected versus observed data for predicting occurrence of microheterogeneity based on null model or alternative reference model strategy.

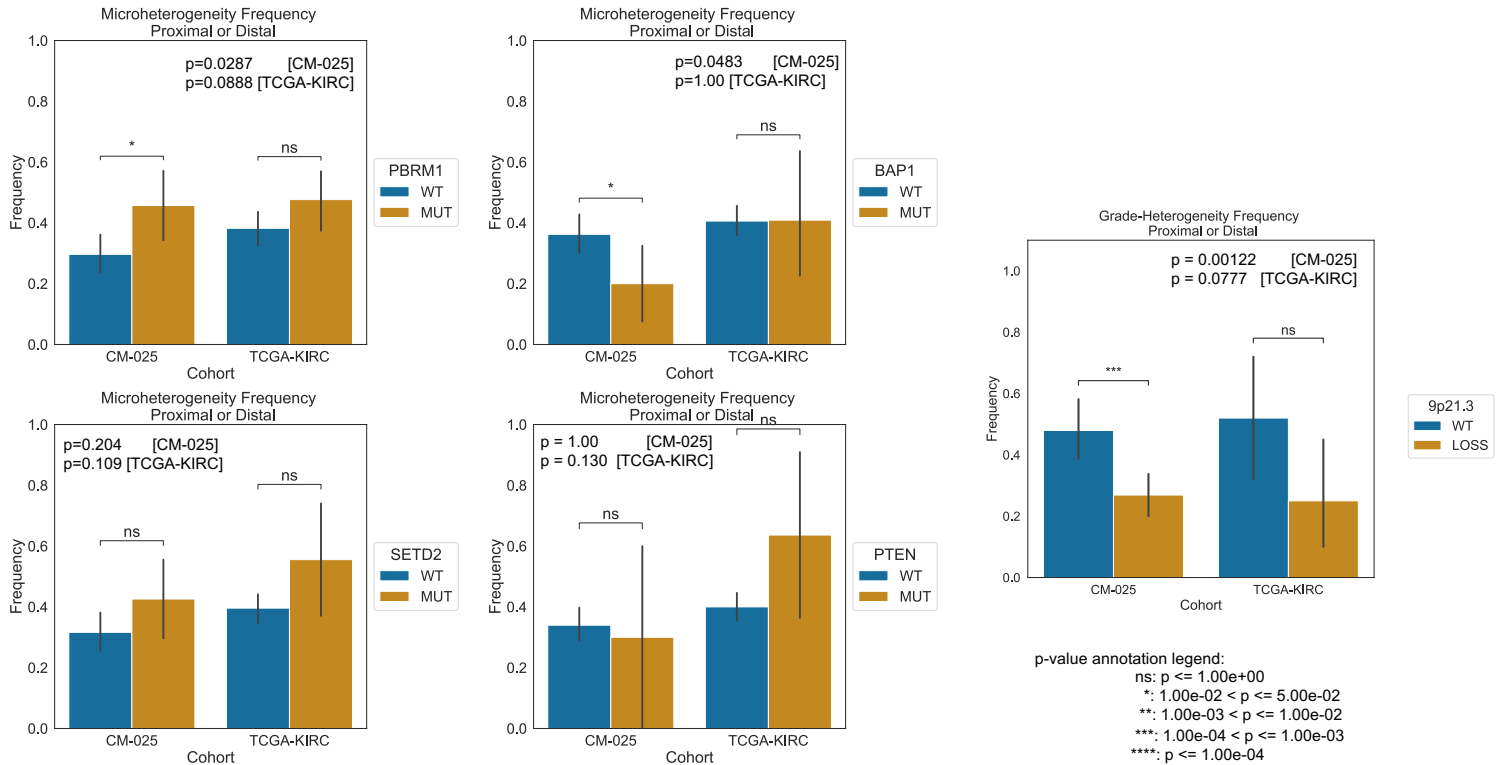

**Extended Data Figure 14: Frequency of microheterogeneity within different loss of function states in TCGA-KIRC and CM-025. Significance calculated with Fisher's Exact test.**

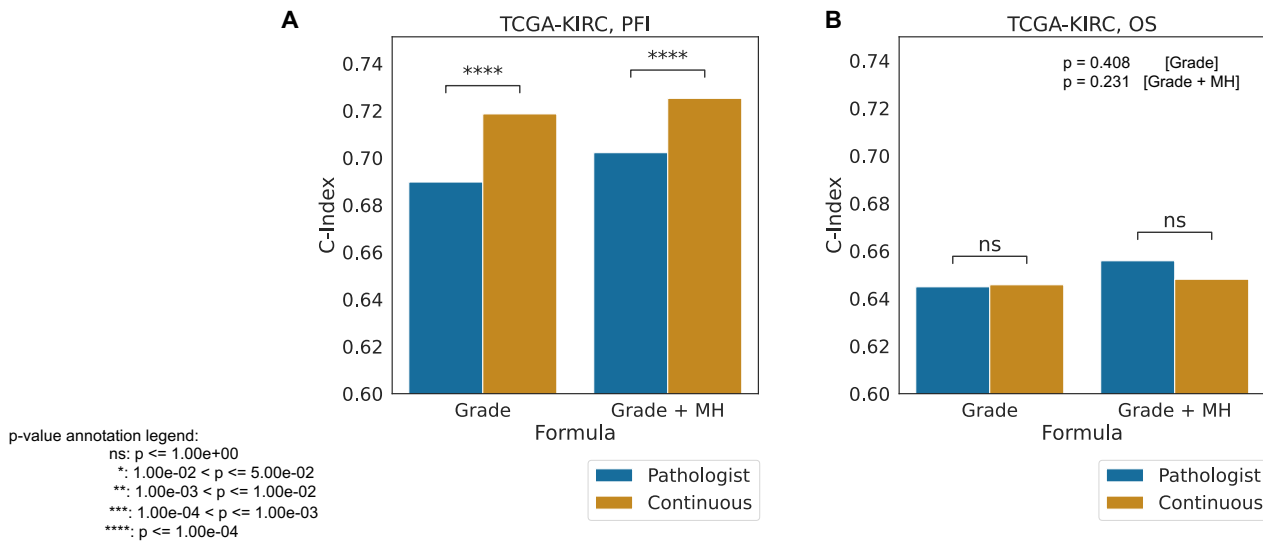

**Extended Data Figure 15 Prognostic correlates of microheterogeneity.** Concordance Index (C-Index) for univariate and bivariate models of PFI and OS in TCGA-KIRC. "Grade": grade type (pathologist vs continuous). "MH" microheterogeneity status (present/absent) as second included covariate. Significance calculated via relative likelihood.

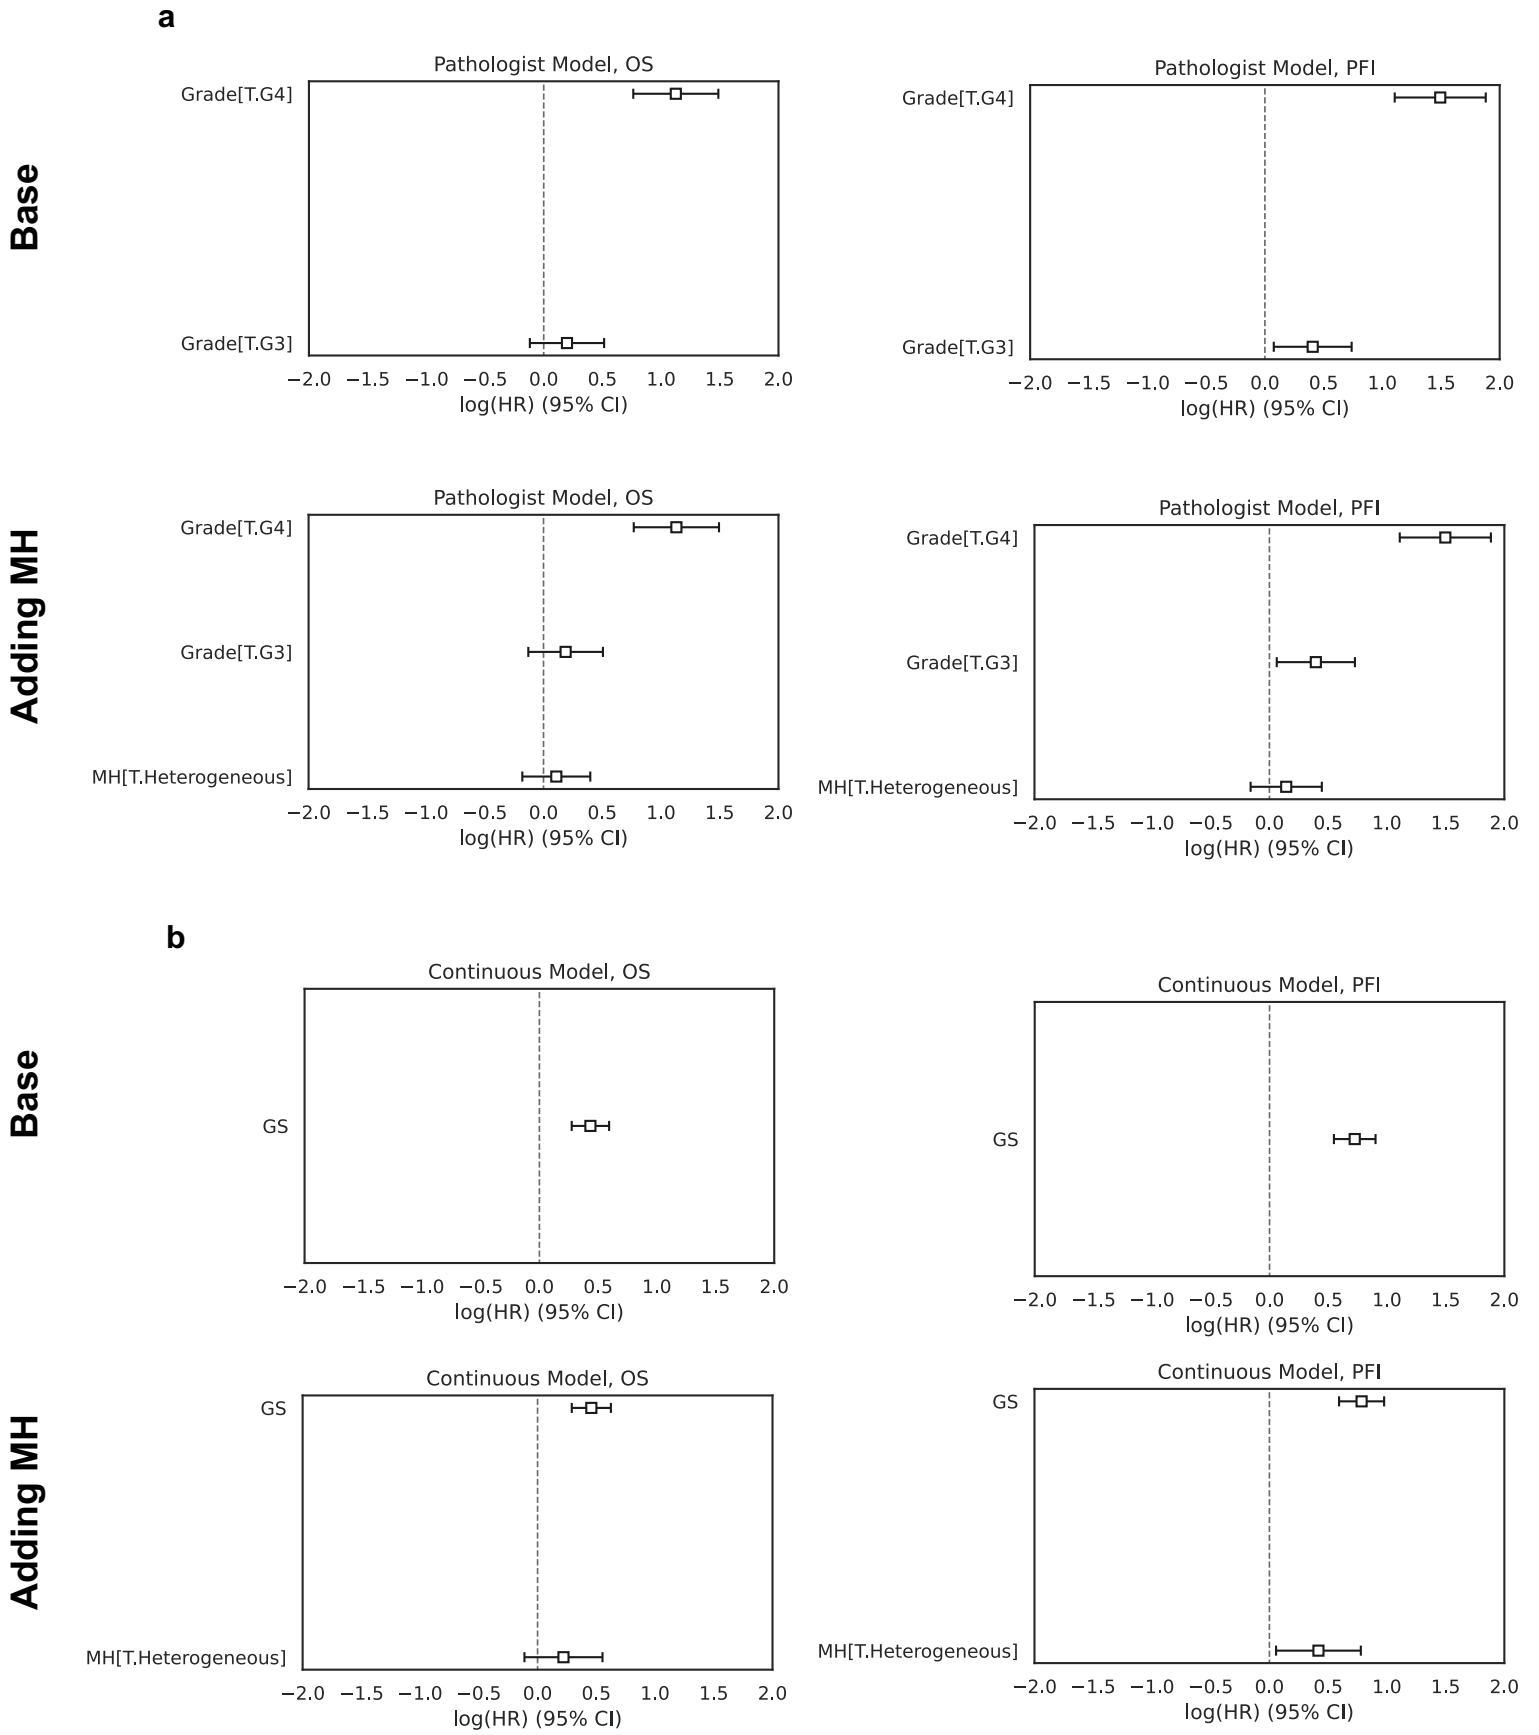

**Extended Data Figure 16: Coefficients for univariate and bivariate Cox proportional hazards models for OS/PFI in TCGA-KIRC. A: pathologist grade. B: continuous grade. “Base”:** single covariate type(s). “MH”: microheterogeneity binary presence.

**c**

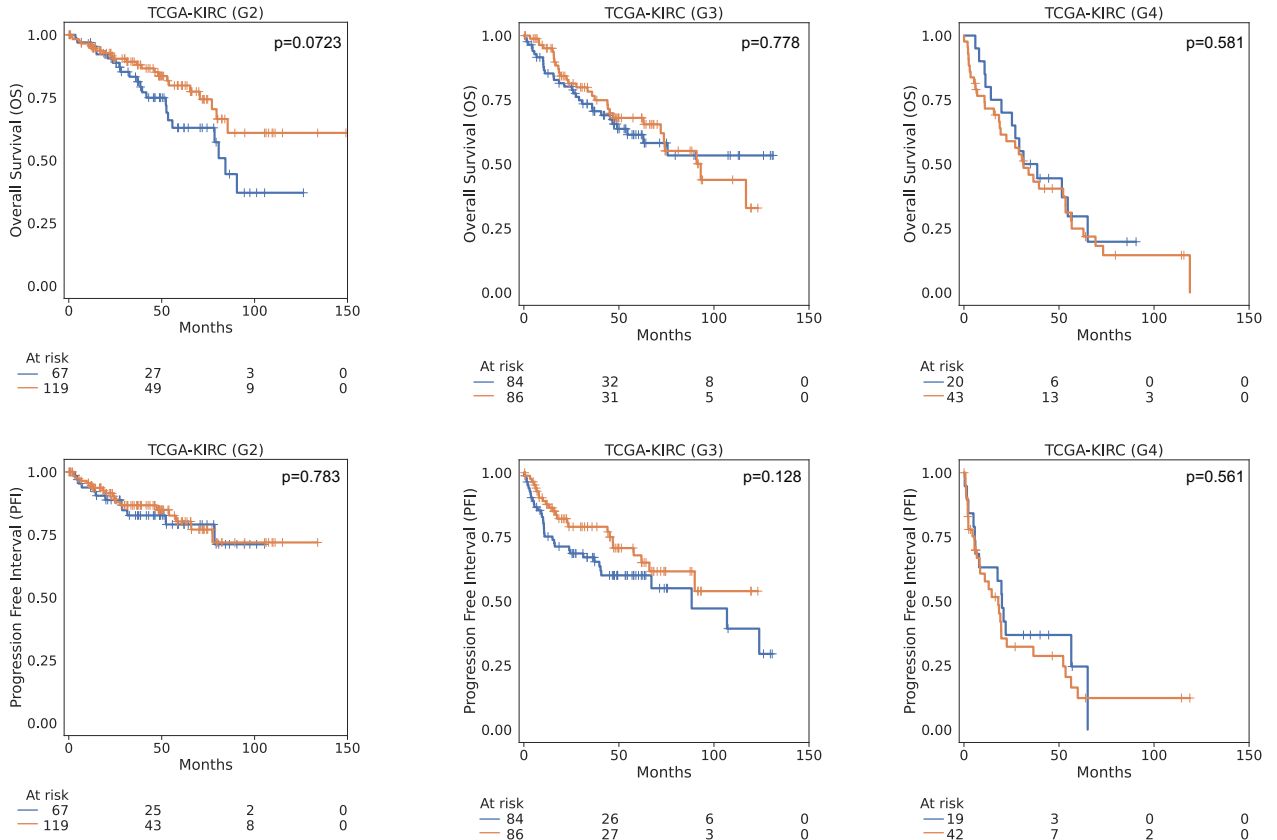

**d**

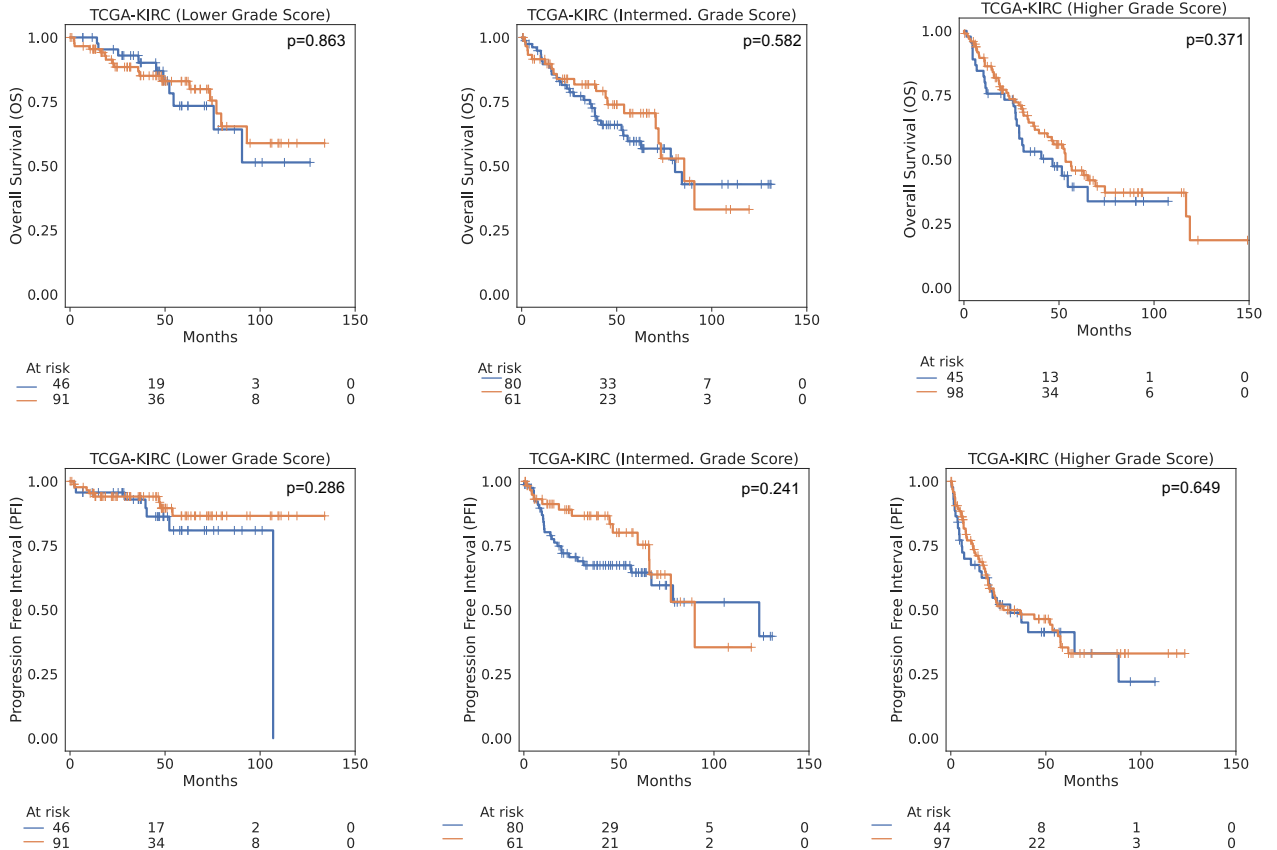

**Extended Data Figure 16 (continued): Coefficients for univariate and bivariate Cox proportional hazards models for OS/PFI in TCGA-KIRC. C: pathologist grade. D: continuous grade. P-values calculated via log-rank test.**

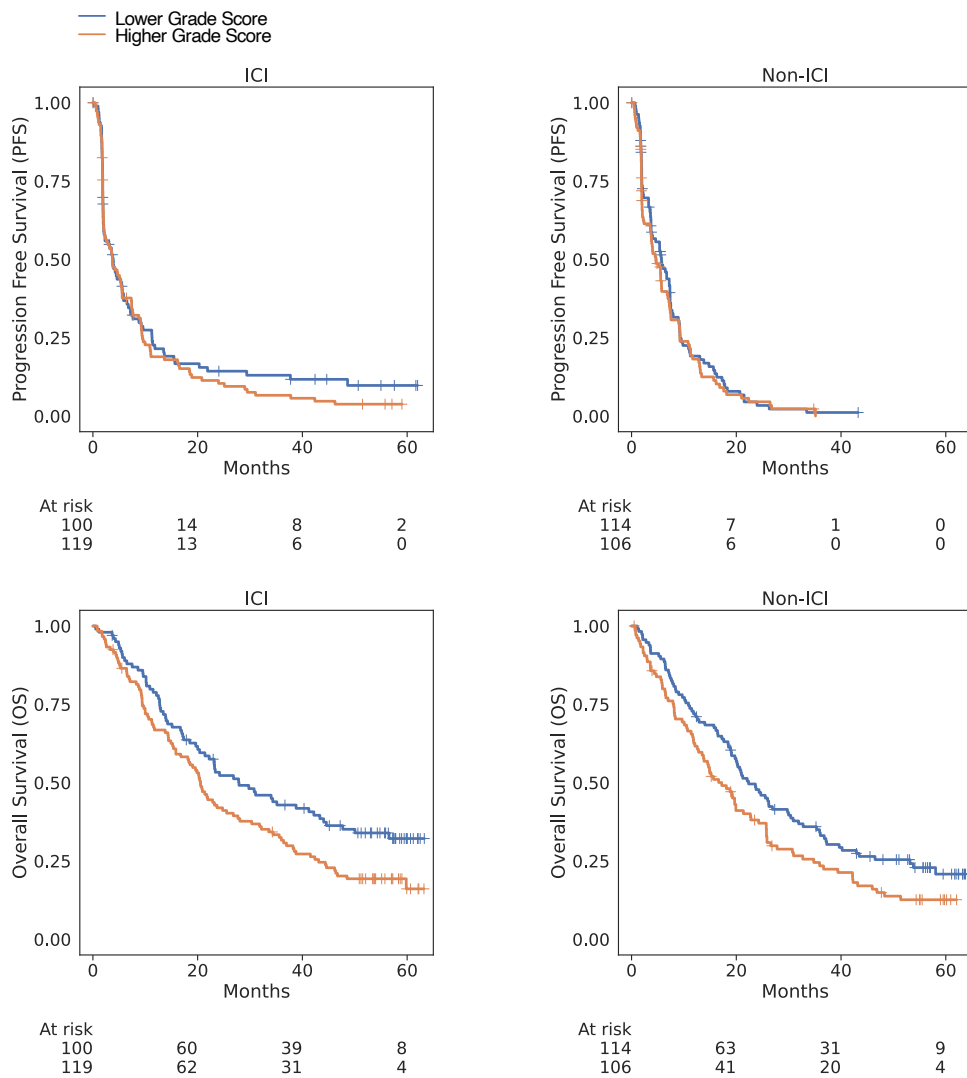

|            | ICI Arm | Non-ICI Arm |
|------------|---------|-------------|
| <b>PFS</b> | 0.419   | 0.569       |
| <b>OS</b>  | 0.0177  | 0.0282      |

**Extended Data Fig. 17: Kaplan-Meier curves for low versus high grade score within each arm of the CM-025 trial.** Top row: progression free survival (PFS). Bottom row: overall survival (OS). Stratification based on the median inferred grade score in the CM-025 cohort. Table: log-rank test p-values for shown curves.

|            | <b>ICI Arm<br/>Microheterogeneous only</b> | <b>ICI Arm<br/>Microhomogeneous<br/>Only</b> |
|------------|--------------------------------------------|----------------------------------------------|
| <b>OS</b>  | 0.0770                                     | 0.726                                        |
| <b>PFS</b> | 0.390                                      | 0.988                                        |

**Extended Data Fig. 18: Likelihood ratio test evaluation of univariate Cox proportional hazards models using continuous grade score in the ICI arm of CM-025.** Columns: subset of data; rows: survival endpoint modelled.



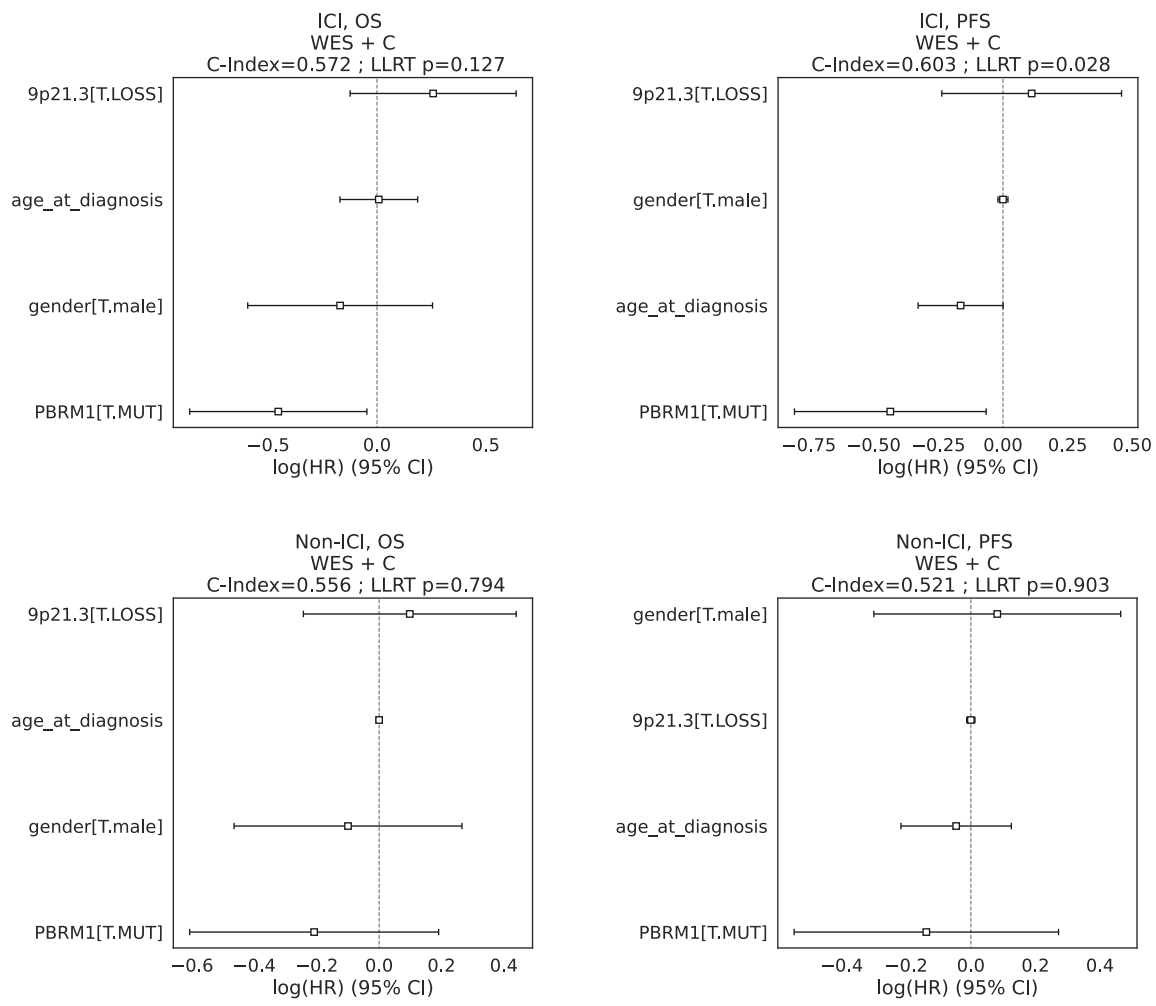

**Extended Data Fig. 19: Cox model coefficients for models in the CM-025 cohort, limited to genomic and clinical features ("WES + C").** LLRT: loglikelihood ratio test. C-Index: concordance index. WES: whole-exome sequencing.

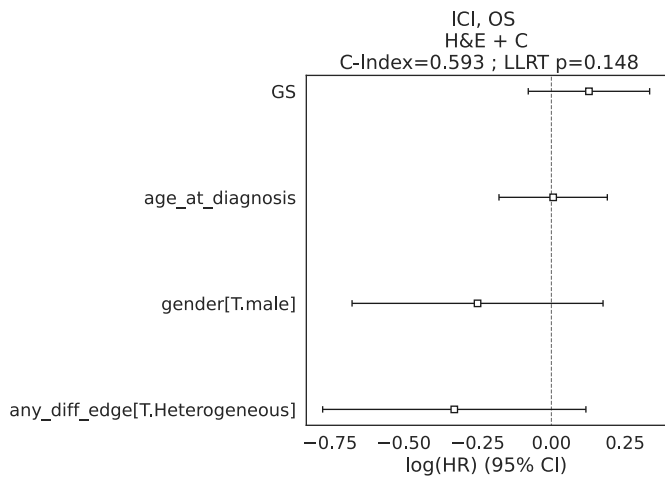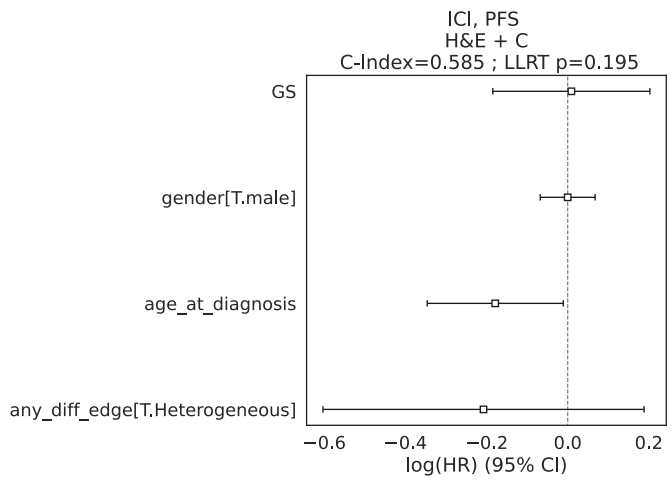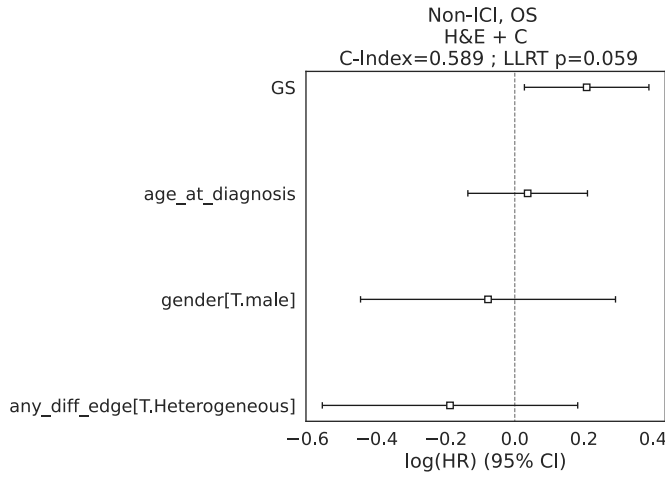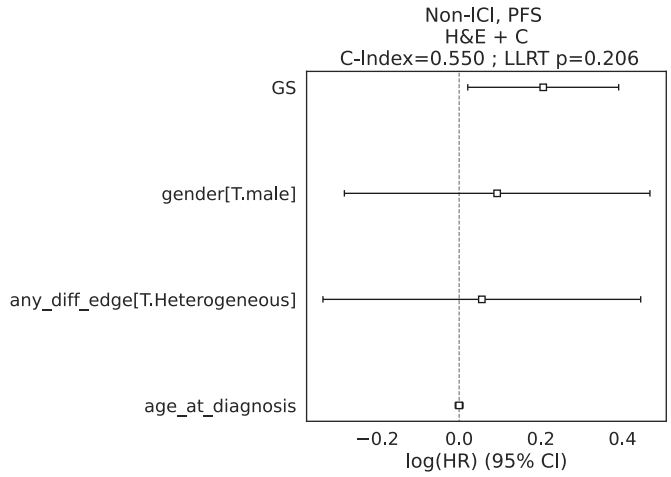

**Extended Data Fig. 20: Cox model coefficients for models in the CM-025 cohort, limited to H&E/computer vision and clinical features ("H&E + C").** LLRT: loglikelihood ratio test. C-Index: concordance index. `any\_diff\_edge`: microheterogeneity categorical variable. GS: continuous grade score.

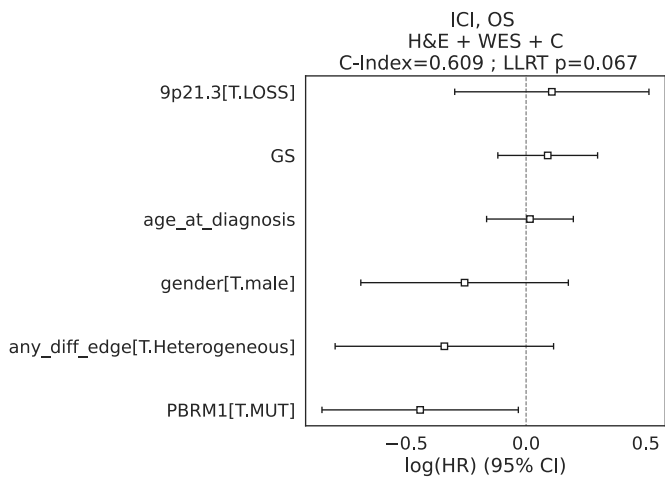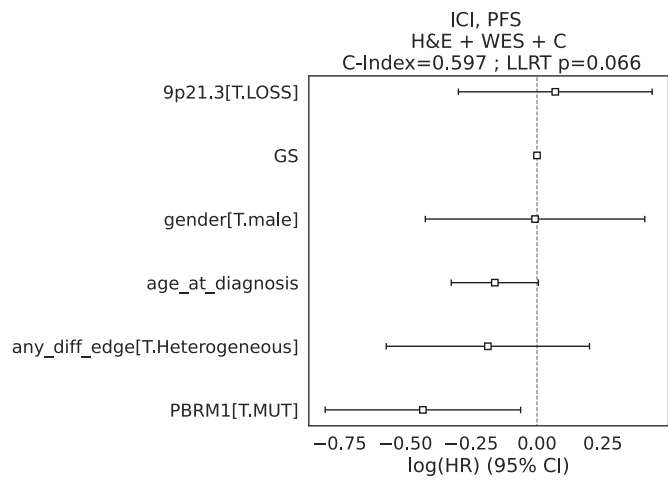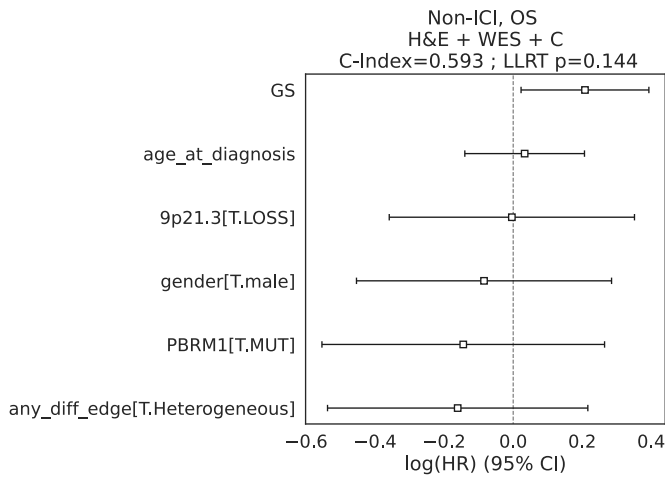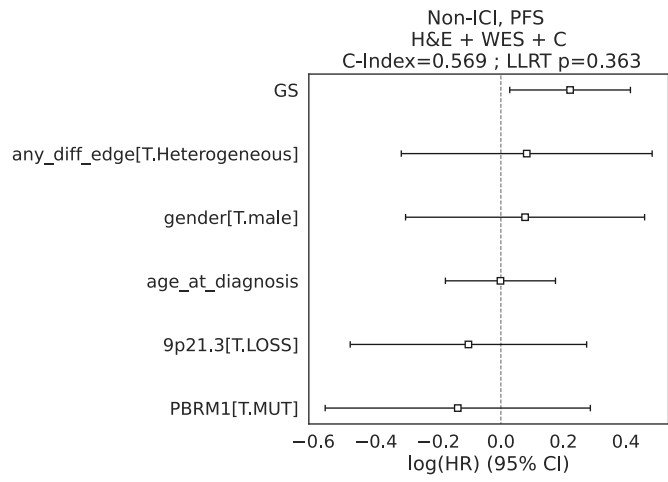

**Extended Data Fig. 21: Cox model coefficients for models in the CM-025 cohort, limited to genomic, H&E/computer vision and clinical features ("H&E + WES + C").** LLRT: loglikelihood ratio test. C-Index: concordance index. `any\_diff\_edge`: microheterogeneity categorical variable. WES: whole-exome sequencing. GS: continuous grade score.

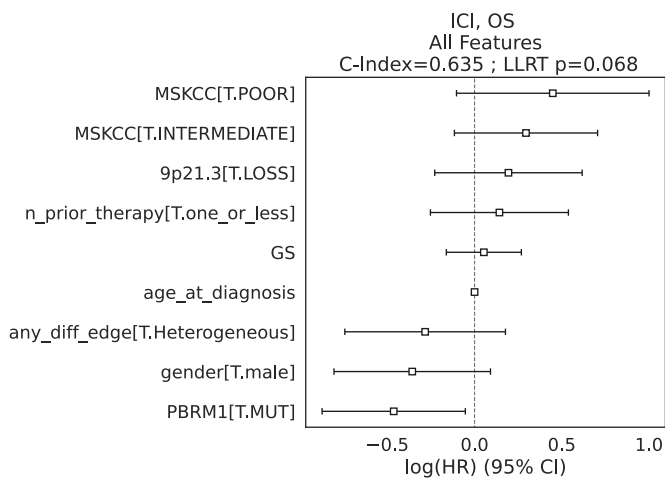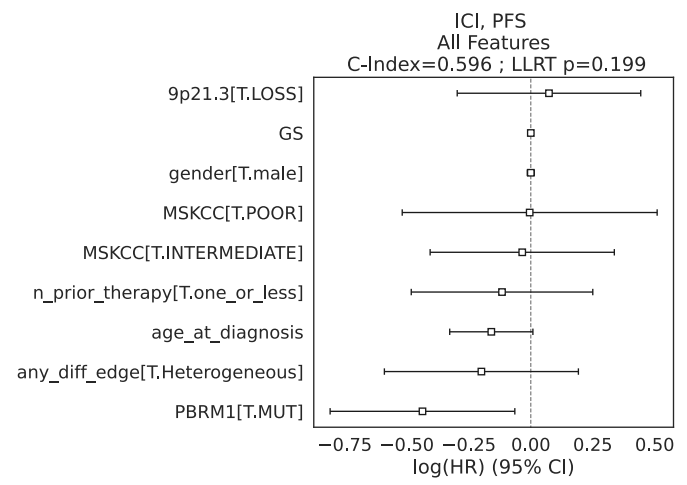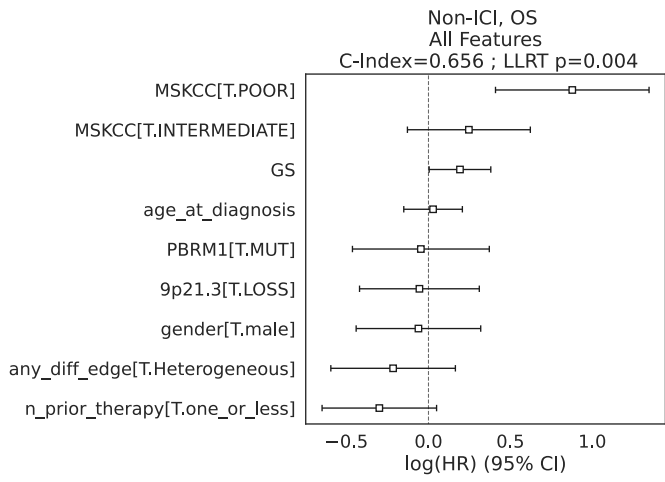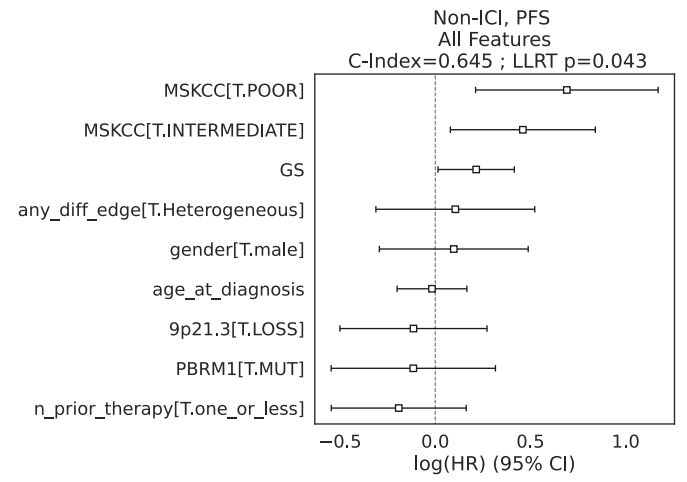

**Extended Data Fig. 22 Cox model coefficients for models in the CM-025 cohort, using all available covariate types (genomic, H&E/computer vision, clinical, risk). LLRT: loglikelihood ratio test. C-Index: concordance index. `any\_diff\_edge`: microheterogeneity categorical variable. GS: continuous grade score. MSKCC: MSKCC risk group (categorical). `n\_prior\_therapy`: number of lines of therapies administered prior to the trial.**

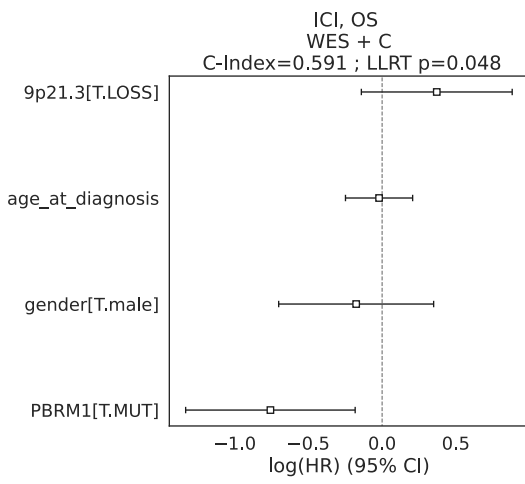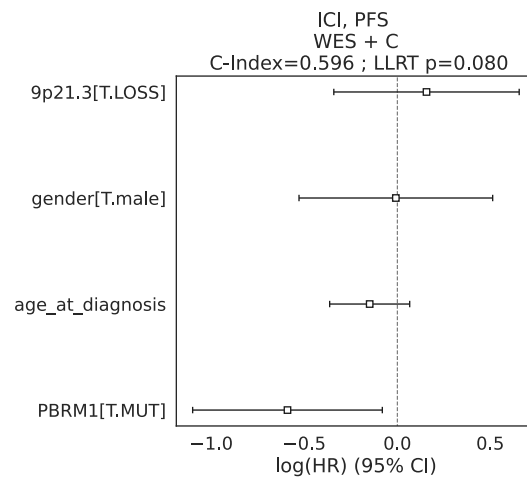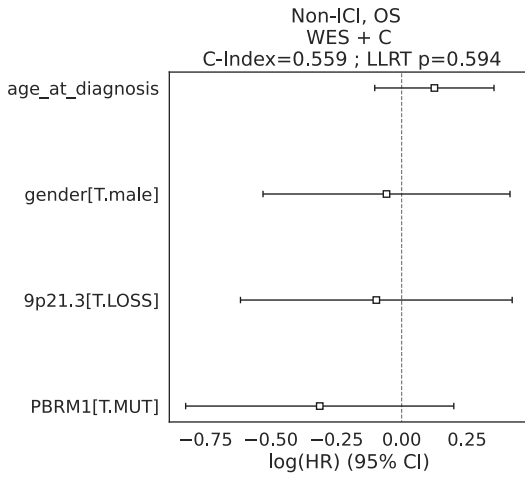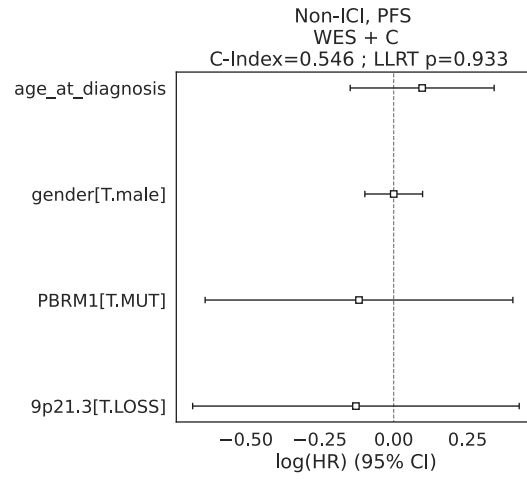

**Extended Data Fig. 23: Cox model coefficients for models in the CM-025 cohort, limited to genomic and clinical features, restricted to subset where TIL are evaluable ("WES + C").** LLRT: loglikelihood ratio test. C-Index: concordance index. `any\_diff\_edge`: microheterogeneity categorical variable.

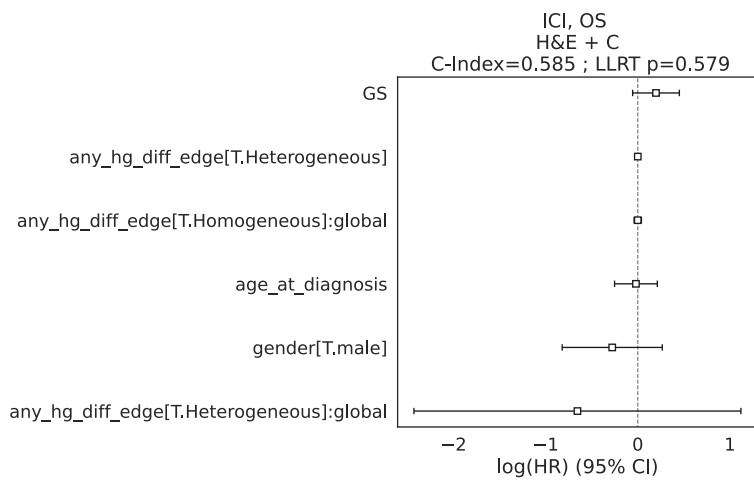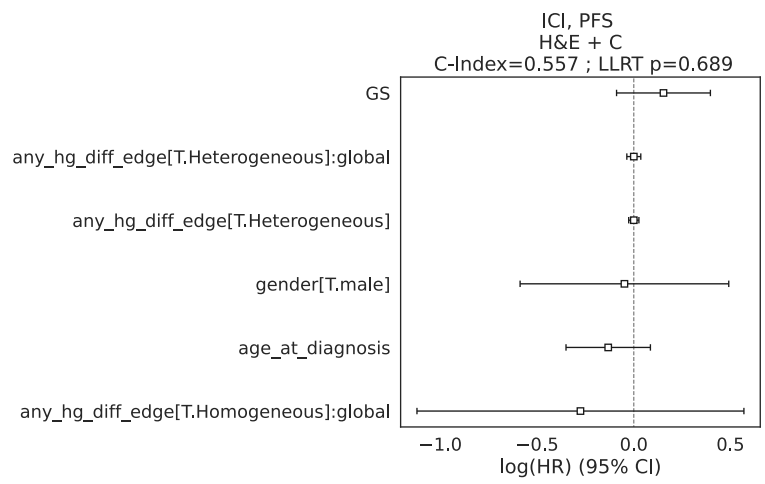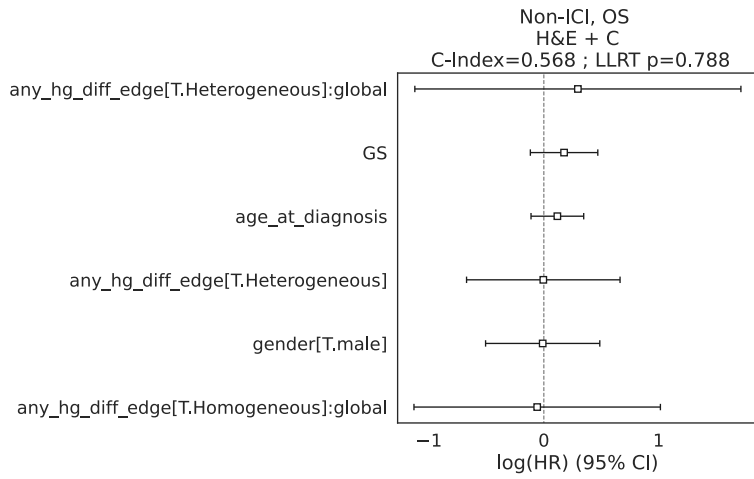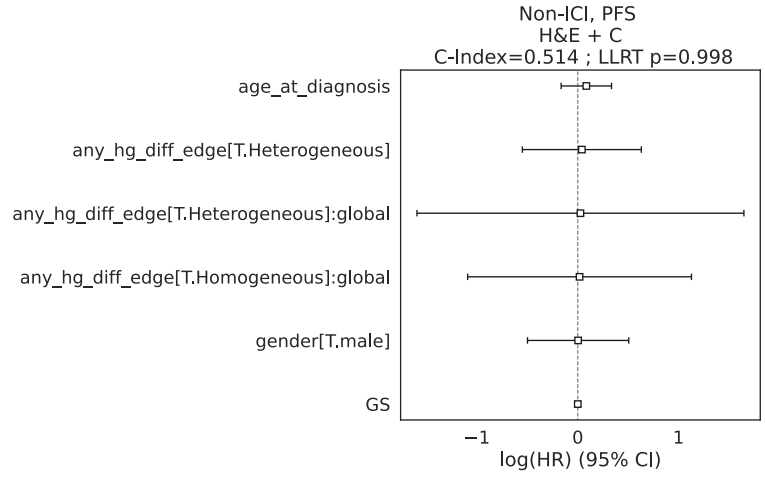

**Extended Data Fig. 24: Cox model coefficients for models in the CM-025 cohort, limited to H&E/computer vision [TIL included] and clinical features ("H&E + C").** LLRT: loglikelihood ratio test. C-Index: concordance index. `any\_hg\_diff\_edge`: microheterogeneity categorical variable (high-grade node involved in RAG edge required). GS: continuous grade score. Global: area infiltration fraction across evaluated tumor area (fraction tiles above minimum TIL count).

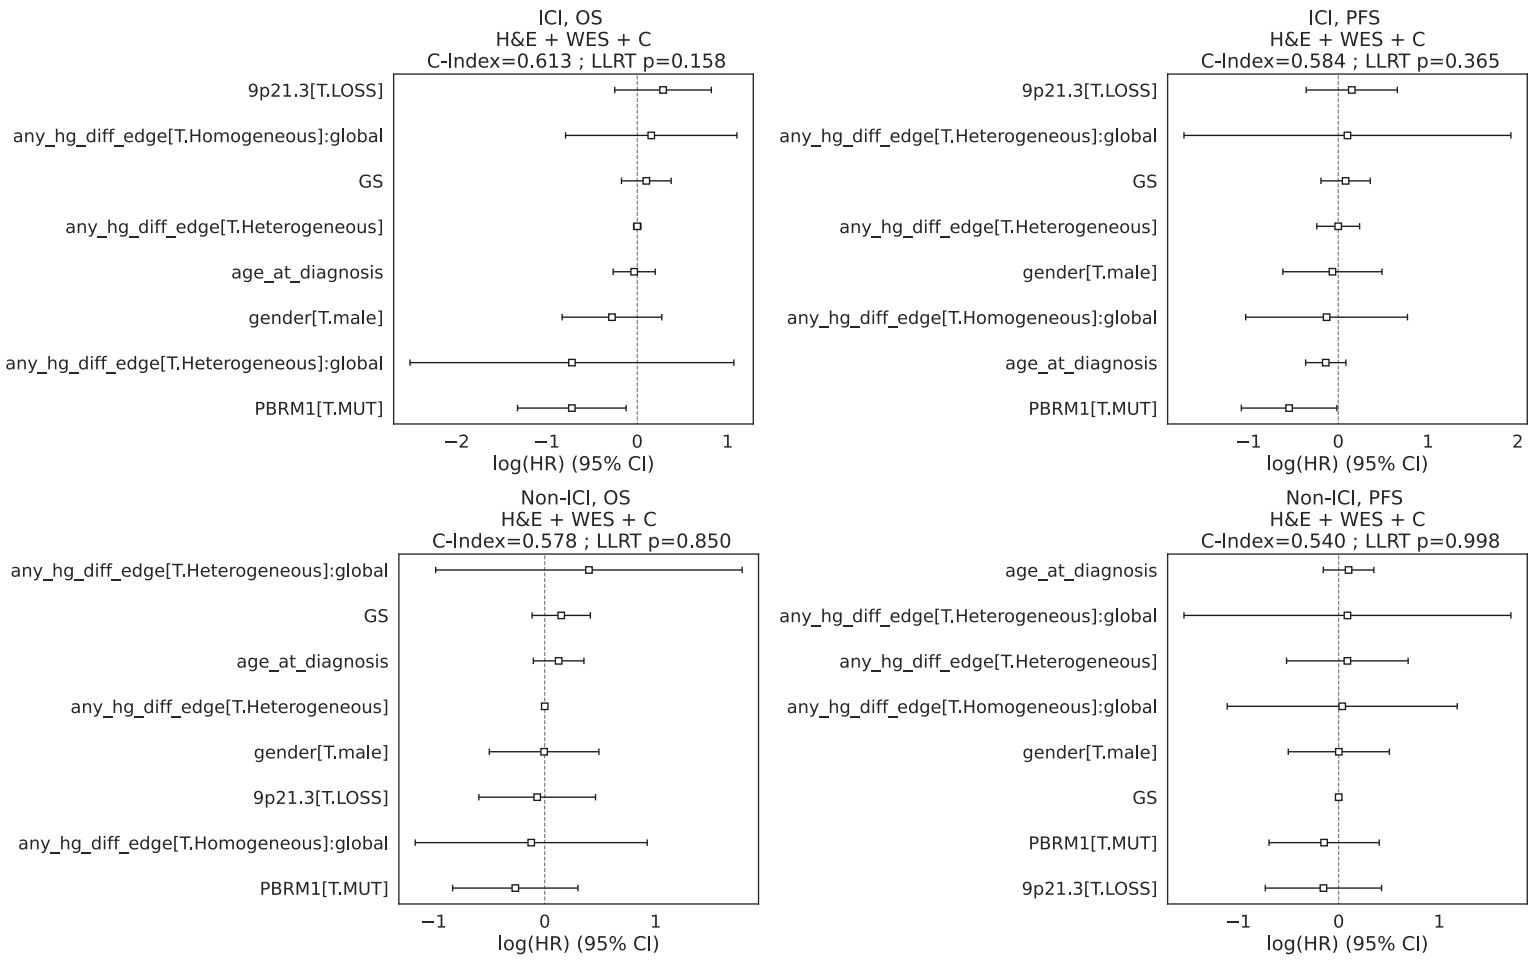

**Extended Data Fig. 25: Cox model coefficients for models in the CM-025 cohort, limited to genomic, H&E/computer vision [TIL included] and clinical features ("H&E + WES + C").** LLRT: loglikelihood ratio test. C-Index: concordance index. `any\_hg\_diff\_edge`: microheterogeneity categorical variable (high-grade node involved in RAG edge required). GS: continuous grade score. Global: area infiltration fraction across evaluated tumor area (fraction tiles above minimum TIL count).

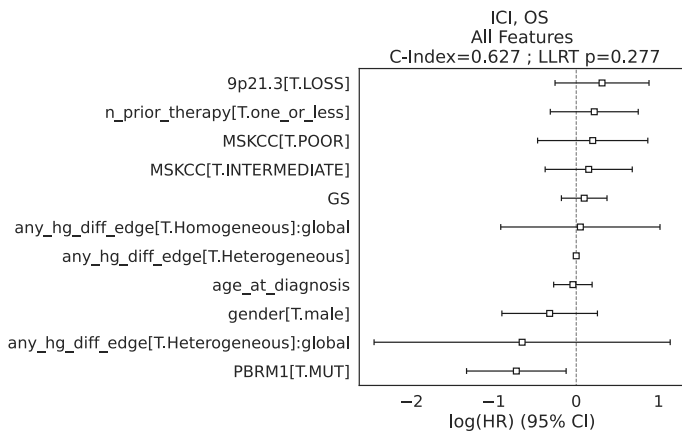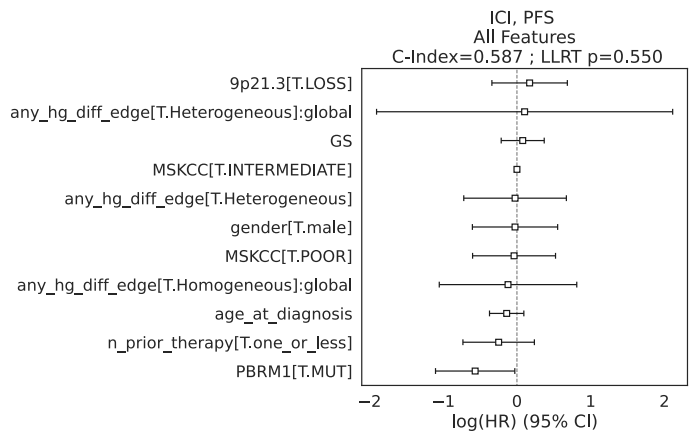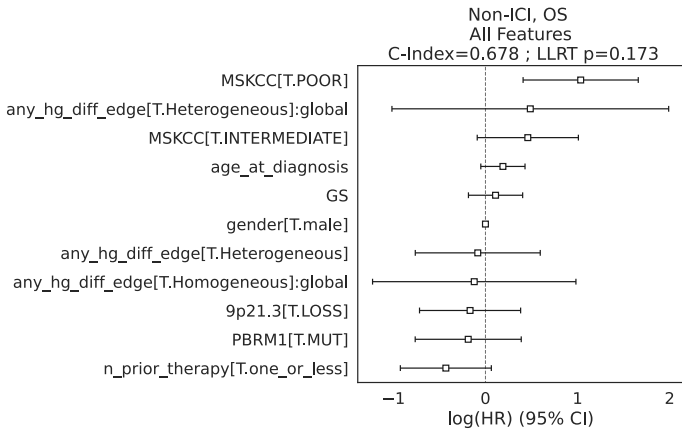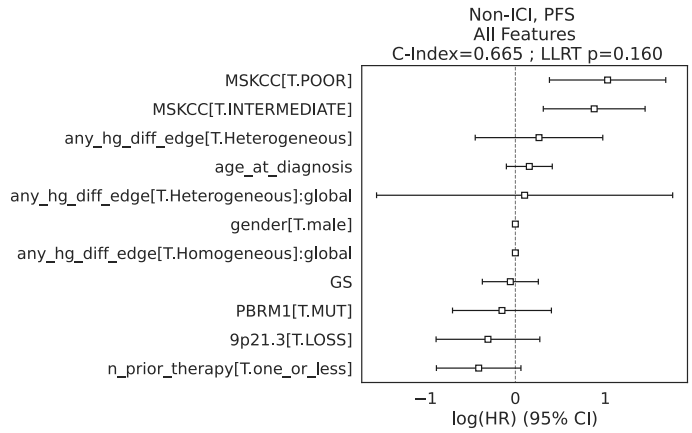

**Extended Data Fig. 26: Cox model coefficients for models in the CM-025 cohort, using all available covariate types (genomic, H&E/computer vision [TIL included], clinical, risk). LLRT: loglikelihood ratio test. C-Index: concordance index. `any\_hg\_diff\_edge`: microheterogeneity categorical variable (high-grade node involved in RAG edge required). GS: continuous grade score. Global: area infiltration fraction across evaluated tumor area (fraction tiles above minimum TIL count). MSKCC: MSKCC risk group (categorical). `n\_prior\_therapy`: number of lines of therapies administered prior to the trial.**



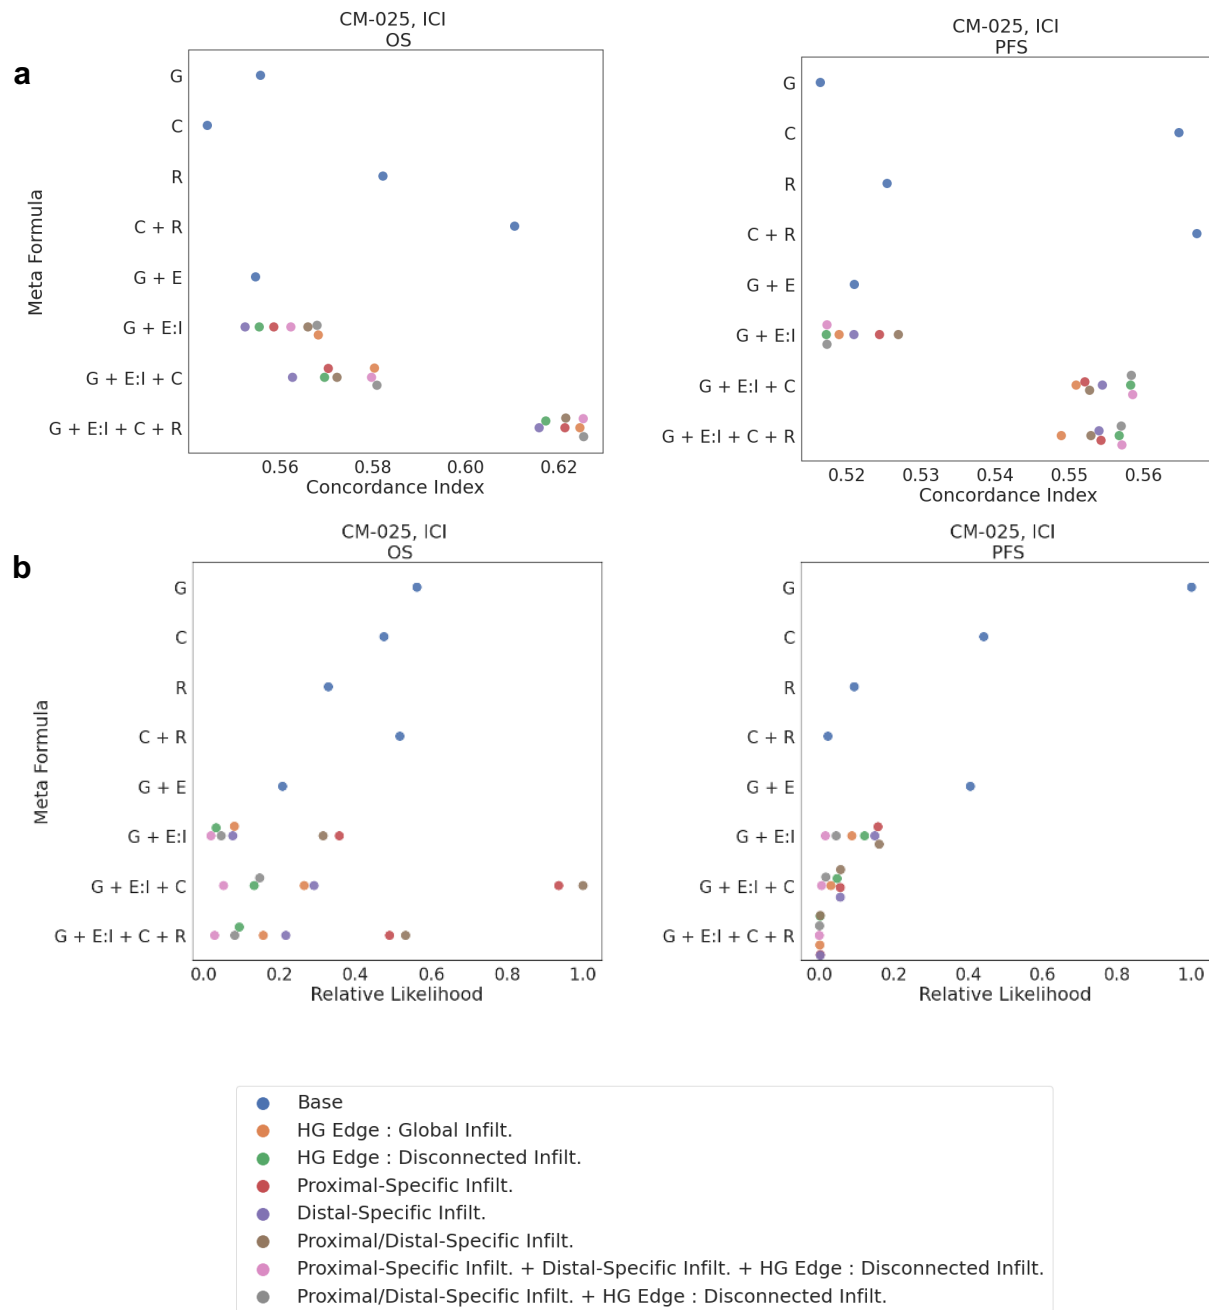

**Extended Data Figure 27: Comparison of different immune-context specifications when fitting Cox proportional hazards models for overall survival in CM-025, ICI arm. A. Concordance Index. B. Relative Likelihood. Colors indicate the form of infiltration covariate used. HG Edge: edge involving a high-grade node (average score above 0.8). *Global*: Using all evaluable tumor area for infiltration fraction description. *Disconnected*: Using nodes that are disconnected from RAG. *Proximal* or *Distal*: infiltration specific to a proximal or distal edge, respectively.**

G: Grade Score  
 E: Heterogeneity/RAG Edge Variable  
 I: Infiltration Variable  
 C: Clinical Base Info (Sex, Age)  
 R: Clinical Risk/Performance Info (MSKCC Risk group, Num. prior lines Tx before trial)  
 (E:I is shorthand for [E + E\*I], where E:I is an interaction term between variables E and I)

|                       | <b>Binary<br/>Microheterogeneity</b> | <b>F-Weighted<br/>Heterogeneity Score</b> | <b>Total-Weighted<br/>Heterogeneity Score</b> |
|-----------------------|--------------------------------------|-------------------------------------------|-----------------------------------------------|
| <b>OS: PBRM1 LOF</b>  | 0.982                                | 0.947                                     | 0.346                                         |
| <b>OS: PBRM1 WT</b>   | 0.0154                               | 0.0338                                    | 0.0219                                        |
| <b>PFS: PBRM1 LOF</b> | 0.355                                | 0.461                                     | 0.767                                         |
| <b>PFS: PBRM1 WT</b>  | 0.960                                | 0.234                                     | 0.826                                         |

**Extended Data Fig. 28: Comparison of Cox model LLRT p-values under different PBRM1 states in the ICI arm of CM-025.**

LOF: loss of function (truncating mutation present).

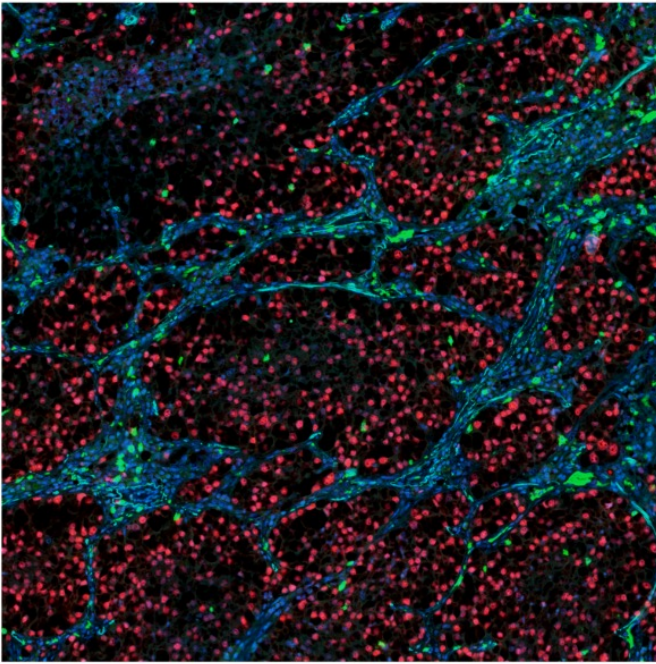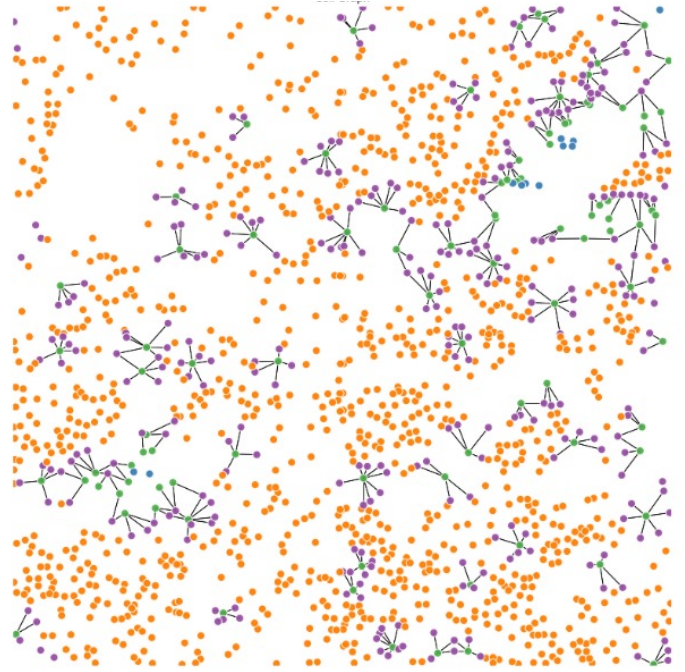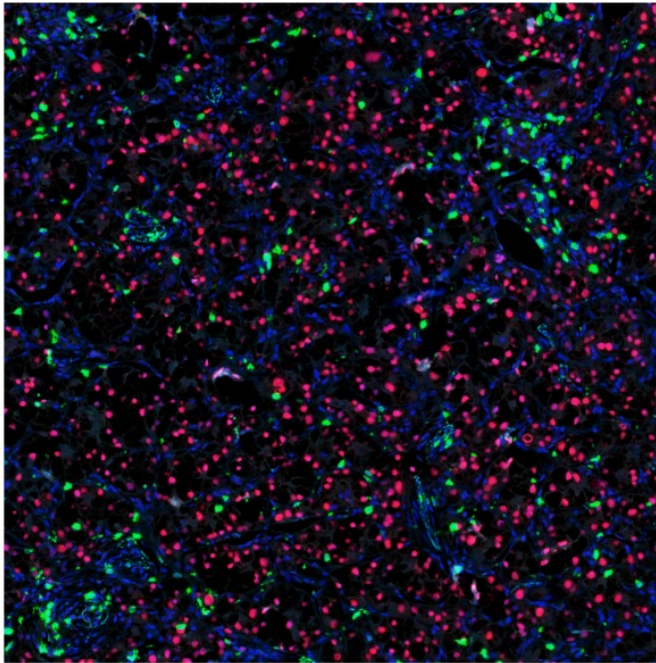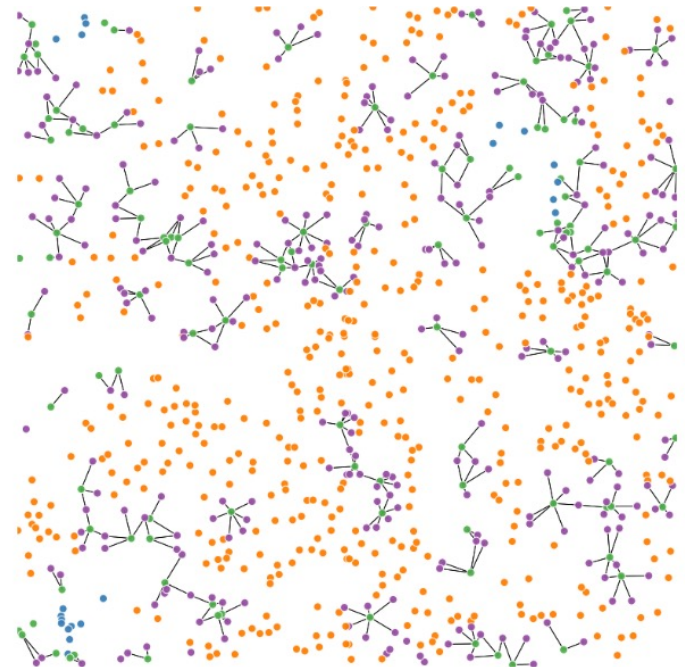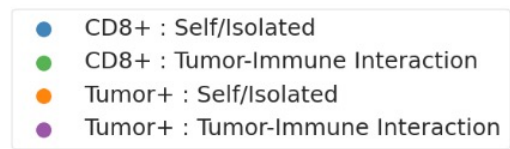

**Extended Data Figure 29: mIF data and cell graphs for immune hotspots: examples from two microhomogeneous cases.** Edges are drawn between CD8+ and tumor cells that are adjacent in a nearest neighbor graph.

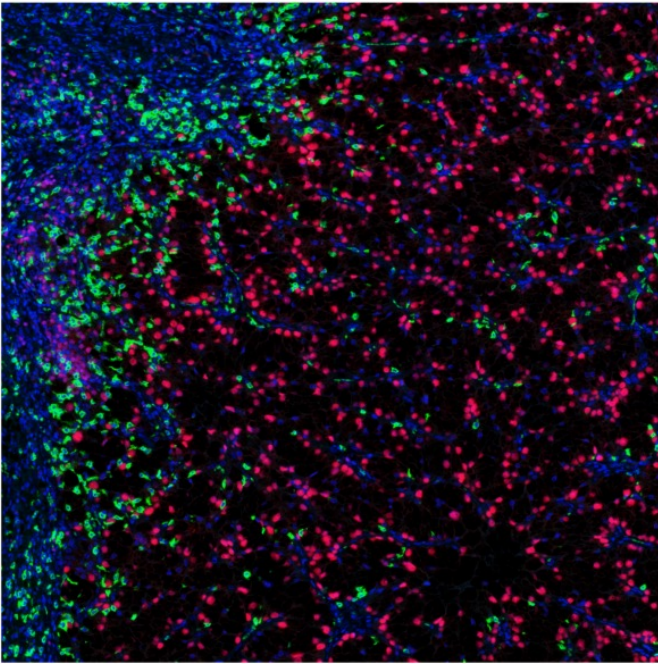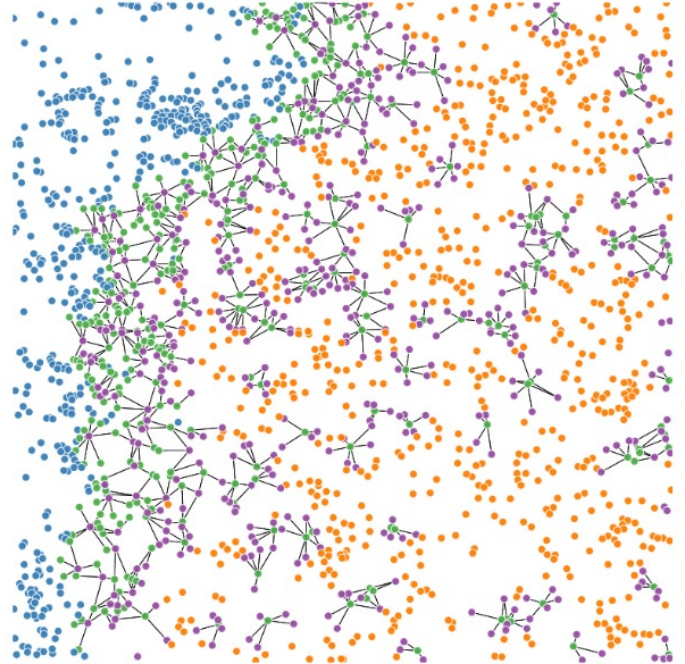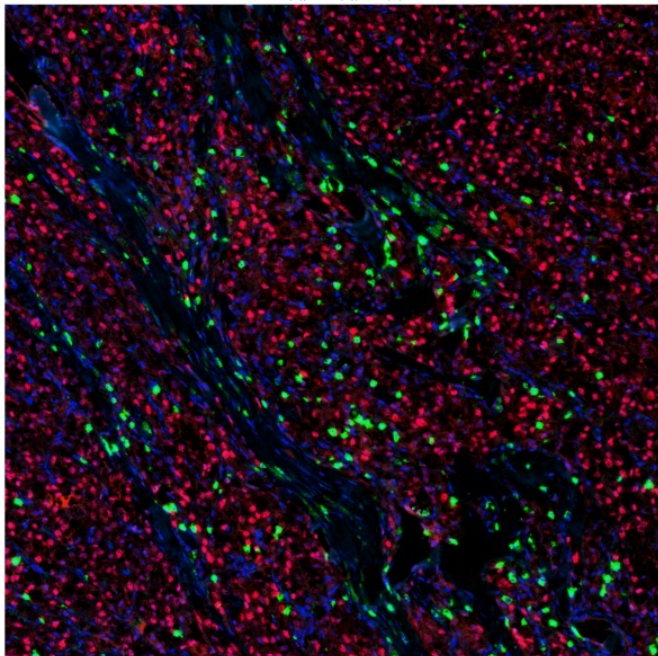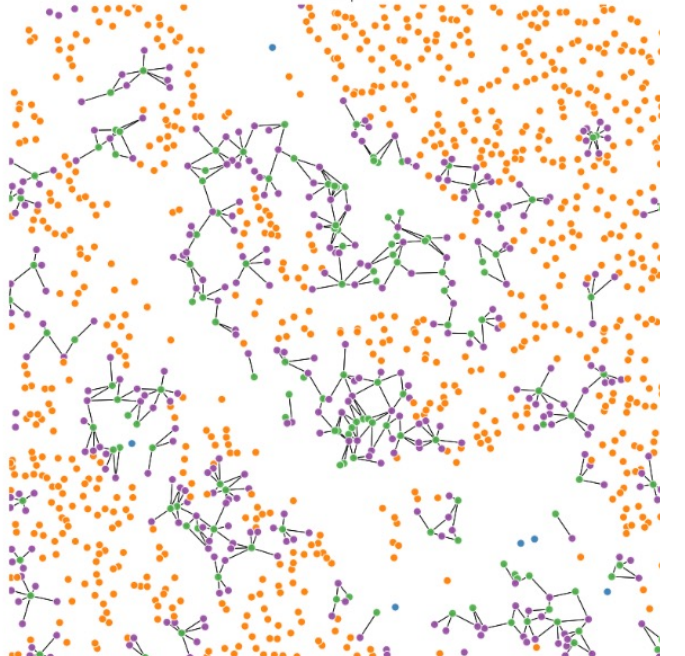

- CD8+ : Self/Isolated
- CD8+ : Tumor-Immune Interaction
- Tumor+ : Self/Isolated
- Tumor+ : Tumor-Immune Interaction

**Extended Data Figure 30: mIF data and cell graphs for immune hotspots: examples from two microheterogeneous cases.** Edges are drawn between CD8+ and tumor cells that are adjacent in a nearest neighbor graph.

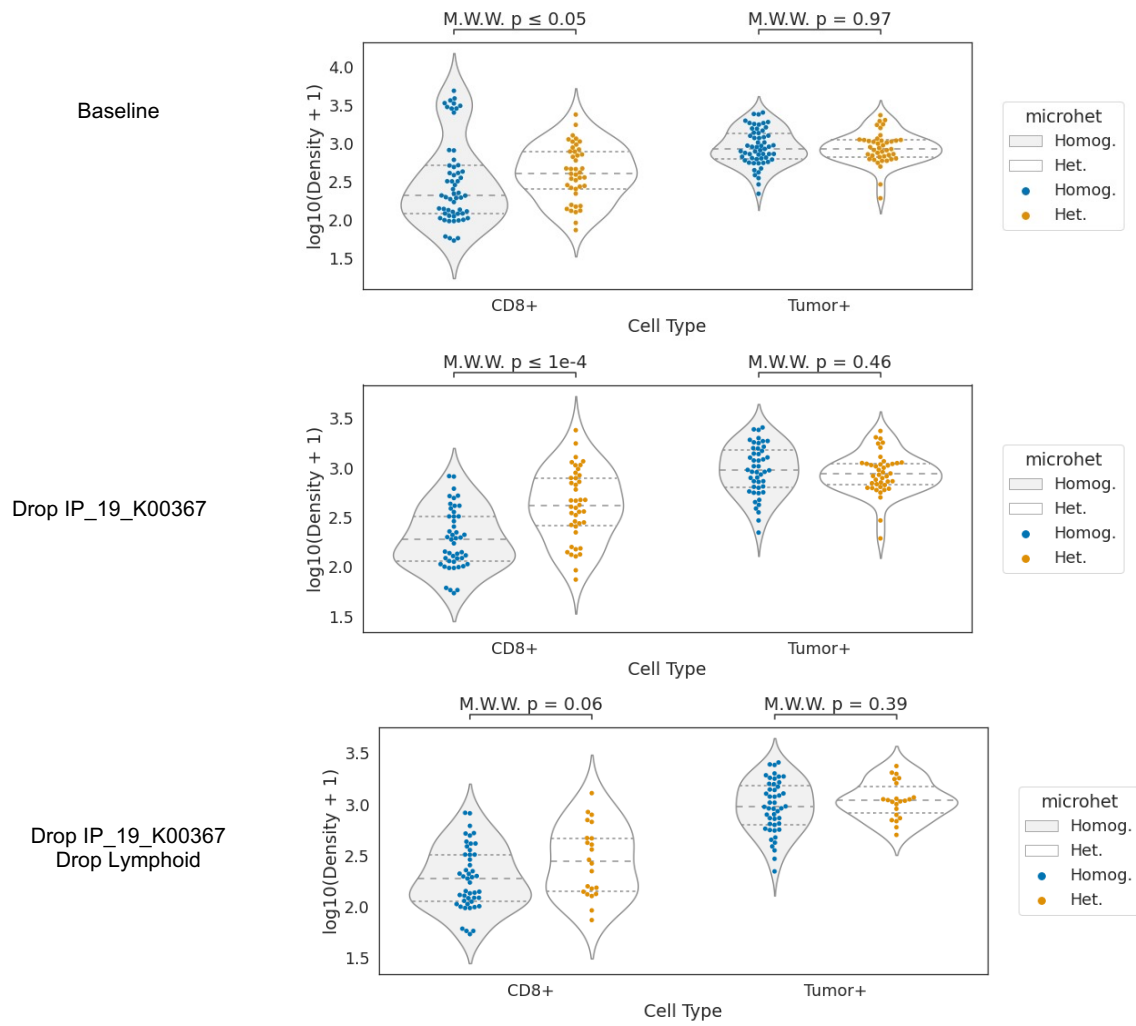

**Extended Data Fig. 31: Cell densities by type and microheterogeneity status in immune hotspots.** Y-axis:  $\log_{10}$  density (cells per 2000px window; approx. 1mm) Rows: different data removal strategies. Significance calculated by Wilcoxon rank sum test (MWW).

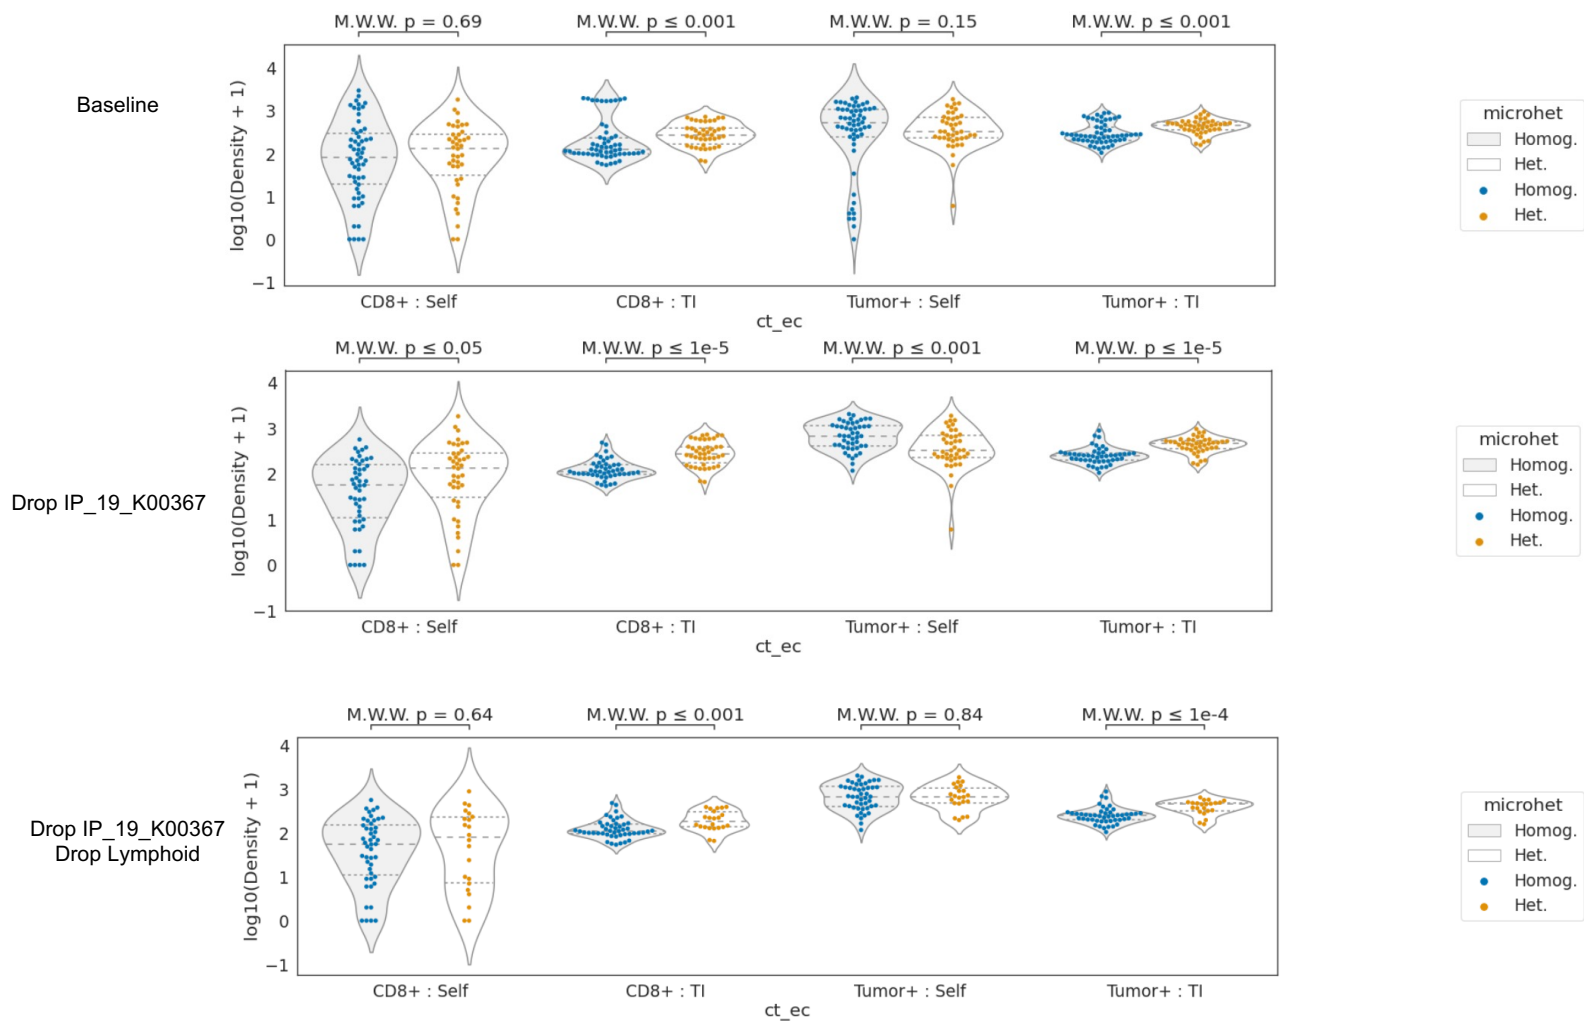

**Extended Data Fig. 32: Cell densities by type, context, and microheterogeneity status in immune hotspots.** Y-axis: log<sub>10</sub> density (cells per 2000px window; approx. 1mm) Rows: different data removal strategies. Significance calculated by Wilcoxon rank sum test (MWW). “TI”: tumor-immune interacting cell context. “Self”: self-interacting cell context.

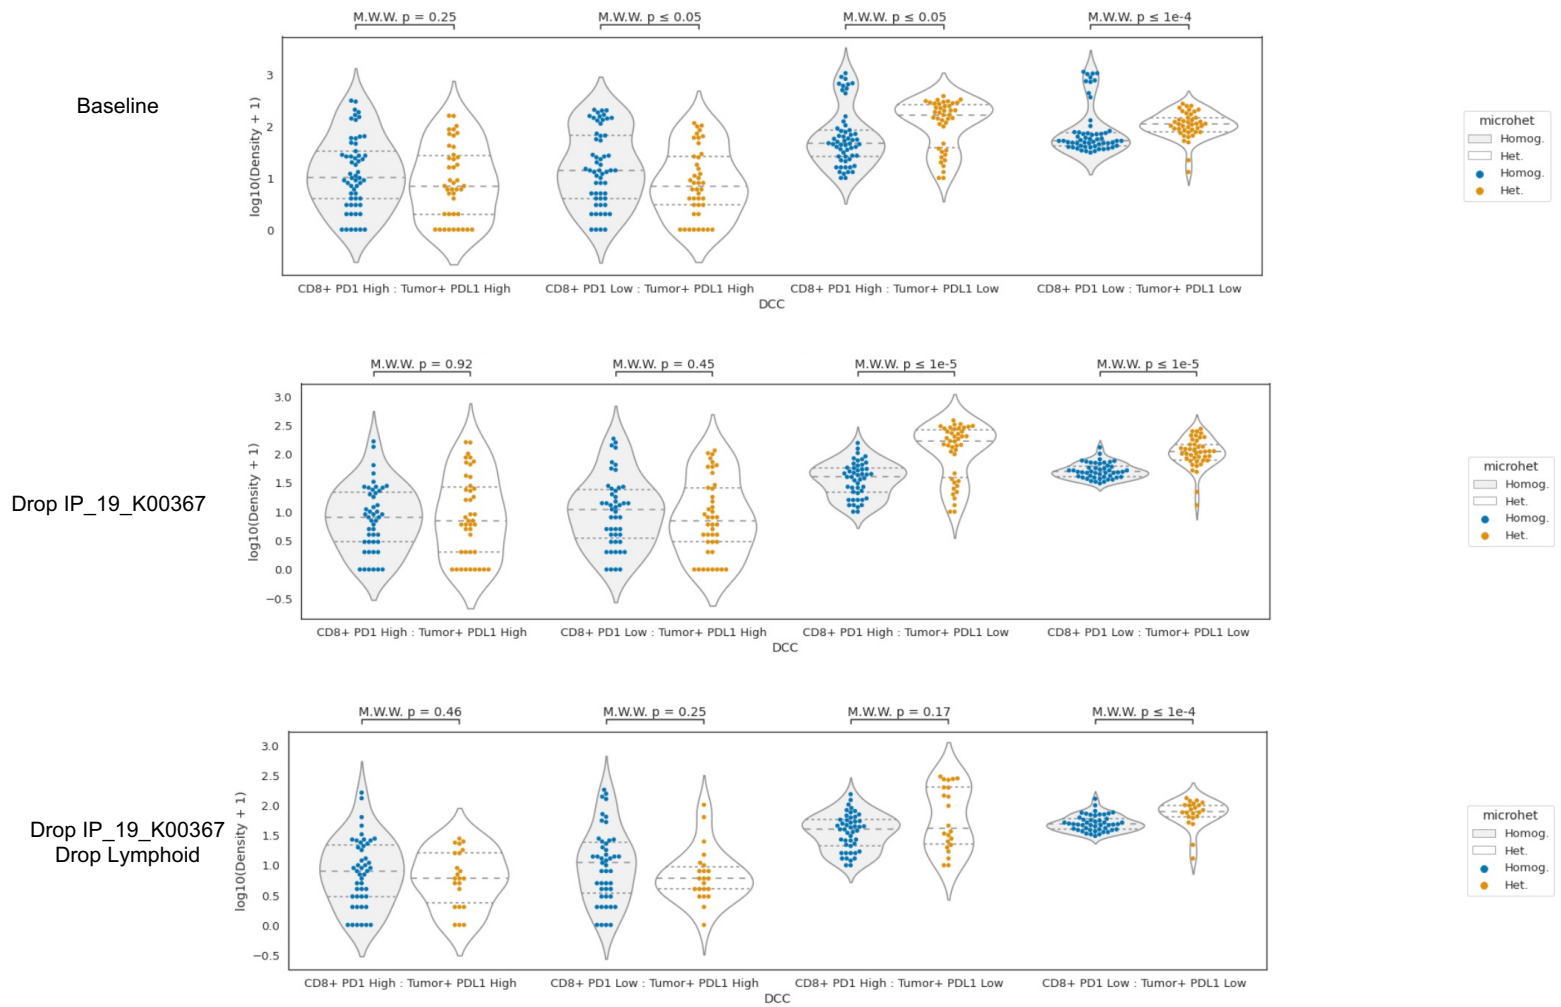

**Extended Data Fig. 33: Cell densities by cell subtype and microheterogeneity status in immune hotspots.**  
 Y-axis: log<sub>10</sub> density (cells per 2000px window; approx. 1mm) Rows: different data removal strategies.  
 Significance calculated by Wilcoxon rank sum test (MWW).
